# Supplementary material for: Clostridioides difficile 630Δerm in silico and in vivo – quantitative growth and extensive polysaccharide secretion
Source: PubMed Central journal article supplement (PMC5377389; doi:10.1002/2211-5463.12208), 2017-03-09
Supplement: FEB4-7-602-s001.pdf [file FEB4-7-602-s001.pdf]

Model S1: **Metabolic model iHD922 of *C. difficile* 630Δerm**

```
#####
#Biomass
Protein_via_tRNA : 0.59772 |Charged-GLY-tRNAs| + 0.63120 |Charged-ALA-tRNAs| + 0.44284 |Charged-VAL-tRNAs| + 0.62167 |Charged-LEU-
tRNAs| + 0.37755 |Charged-ILE-tRNAs| + 0.43067 |Charged-SER-tRNAs| + 0.44035 |Charged-THR-tRNAs| + 0.26329 |Charged-PHE-tRNAs| + 0.21261 |Charged-TYR-tRNAs| + 0.06332 |Charged-
TRP-tRNAs| + 0.09966 |Charged-CYS-tRNAs| + 0.07019 |Charged-MET-tRNAs| + 0.65890 |Charged-LYS-tRNAs| + 0.27429 |Charged-ARG-tRNAs| + 0.10099 |Charged-HIS-tRNAs| + 0.47959 |
Charged-ASP-tRNAs| + 0.88041 |Charged-GLT-tRNAs| + 0.47953 |Charged-ASN-tRNAs| + 0.29371 |Charged-GLN-tRNAs| + 0.36118 |Charged-PRO-tRNAs| + 0.00094 |Charged-SEC-tRNAs| --> 1.0
Protein + 0.59772 |GLY-tRNAs| + 0.63120 |ALA-tRNAs| + 0.44284 |VAL-tRNAs| + 0.62167 |LEU-tRNAs| + 0.37755 |ILE-tRNAs| + 0.43067 |SER-tRNAs| + 0.44035 |THR-tRNAs| + 0.26329 |PHE-
tRNAs| + 0.21261 |TYR-tRNAs| + 0.06332 |TRP-tRNAs| + 0.09966 |CYS-tRNAs| + 0.07019 |MET-tRNAs| + 0.65890 |LYS-tRNAs| + 0.27429 |ARG-tRNAs| + 0.10099 |HIS-tRNAs| + 0.47959 |ASP-
tRNAs| + 0.88041 |GLT-tRNAs| + 0.47953 |ASN-tRNAs| + 0.29371 |GLN-tRNAs| + 0.36118 |PRO-tRNAs| + 0.00094 |SEC-tRNAs| + 15.56122 H+

RNA-Biosyn : 0.83394 ATP + 0.69615 UTP + 0.66708 GTP + 0.90005 CTP + 0.02785 S-adenosyl-L-methionine + 0.00657 NADPH -->
0.02128 H+ + 3.09722 diphosphate + 1.0 RNA + 0.02785 S-adenosyl-L-homocysteine + 0.00657 NADP+

DNA-Biosyn : 1.15183 dATP + 1.15183 dTTP + 0.47233 dGTP + 0.47233 dCTP + 0.00303 S-adenosyl-L-methionine --> 0.00303 H+ + 1.0
DNA + 0.00303 S-adenosyl-L-homocysteine + 3.24832 diphosphate

Lipid-Biosyn : 0.69236 Phosphatidylglycerol + 0.36976 a_cardiolipin --> 1.0 Lipid

L-CWG-Biosyn : 2.59231 UDP-N-acetyl-alpha-D-glucosamine + 1.29615 2-phospho-D-glycerate + 0.76635 UDP-alpha-D-glucose + 0.25545
|diacyl-3-Glc-16-Glc-16-Glc-glycerol| + 1.29615 ATP + 0.05676 H2O --> 1.0 L-CWG + 3.35866 UDP + 0.31221 acetate + 1.295615 ADP + 1.29615 phosphate + 3.67087 H+ # H+ = NAcGlu +
Glc + DeAc + ATP - 2PG; H2O = 12DG + 2PG -DeAc -ATP

Peptidoglycan-Biosyn : 1.17591 a_peptidoglycan --> 1.0 Peptidoglycan

P-CWG-Biosyn : 1.76376 UDP-N-acetyl-alpha-D-galactosamine + 0.88188 GDP-alpha-D-mannose + 2.64564 UDP-alpha-D-glucose --> 1.0
P-CWG + 0.88188 GMP + 4.40940 UDP + 5.29128 H+

Glycogen-Biosyn : 6.16732 |Glycogens| --> 1.0 Glycogen

Ion-Biosyn : 20.96743 K+ + 1.87732 Mg2+ + 0.14628 Fe3+ + 0.09752 Ca2+ + 1.04837 phosphate + 0.12190 diphosphate + 0.02438 Na+
+ 0.02438 Fe2+ + 0.02438 Ni2+ + 0.02438 Cd2+ + 0.02438 Zn2+ --> 1.0 Ion

Metabolite-Biosyn : 0.33818 ATP + 0.08481 ADP + 0.03094 AMP + 0.17332 acetyl-CoA + 0.06667 FAD + 0.16617 NAD+ + 0.03514 NADH +
0.00043 NADP+ + 0.02501 NADPH + 0.06667 ppGpp + 0.06667 tetrahydropteroyl_tri-L-glutamate + 0.06667 di-trans,octa-cis-undecaprenyl_diphosphate + 0.06667 thiamine_diphosphate +
0.06667 adenosylcobalamin + 0.06667 Mg-protoporphyrin + 0.06667 Mo02-molybdopterin_cofactor + 0.06667 |Carboxybiotin-BCCP| + 0.06667 Me-Thr-P-GluNAc-FliC + 0.06667 pyridoxine_5'-
phosphate + 0.06667 L-threonylcarbamoyladenylate --> 1.0 Metabolites + 0.13334 |BCCP-monomers|

Protease : 1.0 Protein + 7.78061 H2O --> 0.59772 glycine + 0.63120 L-alanine + 0.44284 L-valine + 0.62167 L-leucine +
0.37755 L-isoleucine + 0.43067 L-serine + 0.44035 L-threonine + 0.26329 L-phenylalanine + 0.21261 L-tyrosine + 0.06332 L-tryptophan + 0.09966 L-cysteine + 0.07019 L-methionine +
0.65890 L-lysine + 0.27429 L-arginine + 0.10099 L-histidine + 0.47959 L-aspartate + 0.88041 L-glutamate + 0.47953 L-asparagine + 0.29371 L-glutamine + 0.36118 L-proline + 0.0094
L-selenocysteine

RNAase : 1.0 RNA + 0.02858 S-adenosyl-L-homocysteine + 0.00695 NAD+ + 3.13828 H2O --> 0.83394 AMP + 0.69615 UMP + 0.66708
GMP + 0.90005 CMP + 0.02858 S-adenosyl-L-methionine + 0.00695 NADH + 3.11665 H+

DNAase : 1.0 DNA + 0.00303 S-adenosyl-L-homocysteine + 3.24832 H2O --> 1.15220 dAMP + 1.15220 dTMP + 0.47195 dGMP +
0.47195 dCMP + 0.00303 S-adenosyl-L-methionine + 3.24529 H+

Biomass : 0.508 Protein + 0.091 RNA + 0.043 DNA + 0.060 Lipid + 0.024 L-CWG + 0.145 Peptidoglycan + 0.097 P-CWG + 0.005
Glycogen + 0.022 Ion + 0.005 Metabolites + 45 ATP + 45 H2O --> 45 ADP + 45 phosphate + 45 H+

NGAM : 1.0 H2O + 1.0 ATP --> 1.0 ADP + 1.0 phosphate + 1.0 H+

#####
#EXCHANGE
#####
H+_exchange : 1.0 H+[ex] <=>
H2O_exchange : 1.0 H2O[ex] <=>
H2_exchange : 1.0 H2[ex] <=>
H2S_exchange : 1.0 hydrogen_sulfide[ex] <=>
CO2_exchange : 1.0 CO2[ex] <=>
CO_exchange : 1.0 carbon_monoxide[ex] <=>
```

```

ammonium_exchange      : 1.0 ammonium[ex] <=>
sulfite_exchange       : 1.0 sulfite[ex] <=>

phosphate_exchange     : 1.0 phosphate[ex] <=>
selenide_exchange      : 1.0 selenide[ex] <=>

Co2+_exchange          : 1.0 Co2+[ex] <=>
Na+_exchange           : 1.0 Na+[ex] <=>
K+_exchange            : 1.0 K+[ex] <=>
Mg2+_exchange          : 1.0 Mg2+[ex] <=>
Fe2+_exchange          : 1.0 Fe2+[ex] <=>
Fe3+_exchange          : 1.0 Fe3+[ex] <=>
Ca2+_exchange          : 1.0 Ca2+[ex] <=>
Ni2+_exchange          : 1.0 Ni2+[ex] <=>
Cd2+_exchange          : 1.0 Cd2+[ex] <=>
Zn2+_exchange          : 1.0 Zn2+[ex] <=>
molybdate_exchange     : 1.0 molybdate[ex] <=>

D-Glucose_exchange     : 1.0 D-glucose[ex] <=>
urea_exchange          : 1.0 urea[ex] <=>
methanethiol_exchange  : 1.0 methanethiol[ex] <=>

ethanol_exchange       : 1.0 ethanol[ex] <=>
propanol_exchange      : 1.0 n-propanol[ex] <=>
butanol_exchange       : 1.0 n-butanol[ex] <=>
isobutanol_exchange    : 1.0 isobutanol[ex] <=>
4-methylphenol_exchange : 1.0 4-methylphenol[ex] <=>
acetone_exchange       : 1.0 acetone[ex] <=>

(R)-pantothenate_exchange : 1.0 (R)-pantothenate[ex] <=>
biotin_exchange        : 1.0 biotin[ex] <=>
pyridoxine_exchange    : 1.0 pyridoxine[ex] <=>

2-aminobutanoate_exchange : 1.0 (S)-2-aminobutanoate[ex] <=>
S-methyl-5-thio-D-ribose_exchange : 1.0 S-methyl-5-thio-D-ribose[ex] <=>
5-aminopentanoate_exchange : 1.0 5-aminopentanoate[ex] <=>
THMF_exchange          : 1.0 (2R,4S)-2-methyl-2,3,3,4-tetrahydroxytetrahydrofuran[ex] <=>
5-deoxy-D-ribose_exchange : 1.0 5-deoxy-D-ribose[ex] <=>
beta-alanine_exchange  : 1.0 beta-alanine[ex] <=>
3-amino-2-methylpropanoate_exchange : 1.0 (R)-3-amino-2-methylpropanoate[ex] <=>
aminoacetone_exchange  : 1.0 aminoacetone[ex] <=>
glycolaldehyde_exchange : 1.0 glycolaldehyde[ex] <=>
S-methyl-5-thio-alpha-D-ribose_1-phosphate_exchange : 1.0 S-methyl-5-thio-alpha-D-ribose_1-phosphate[ex] <=>

valine_exchange        : 1.0 L-valine[ex] <=>
leucine_exchange       : 1.0 L-leucine[ex] <=>
isoleucine_exchange    : 1.0 L-isoleucine[ex] <=>
tryptophan_exchange    : 1.0 L-tryptophan[ex] <=>
cysteine_exchange      : 1.0 L-cysteine[ex] <=>
methionine_exchange    : 1.0 L-methionine[ex] <=>
proline_exchange       : 1.0 L-proline[ex] <=>

glycine_exchange       : 1.0 glycine[ex] <=>
alanine_exchange        : 1.0 L-alanine[ex] <=>
aspartate_exchange     : 1.0 L-aspartate[ex] <=>
glutamate_exchange     : 1.0 L-glutamate[ex] <=>
serine_exchange        : 1.0 L-serine[ex] <=>
threonine_exchange     : 1.0 L-threonine[ex] <=>
tyrosine_exchange      : 1.0 L-tyrosine[ex] <=>
phenylalanine_exchange : 1.0 L-phenylalanine[ex] <=>
arginine_exchange      : 1.0 L-arginine[ex] <=>
histidine_exchange     : 1.0 L-histidine[ex] <=>

```

```

lysine_exchange                : 1.0 L-lysine[ex] <=>

formate_exchange               : 1.0 formate[ex] <=>
acetate_exchange               : 1.0 acetate[ex] <=>
propanoate_exchange            : 1.0 propanoate[ex] <=>
butanoate_exchange             : 1.0 butanoate[ex] <=>
valerate_exchange              : 1.0 pentanoate[ex] <=>
hexanoate_exchange             : 1.0 hexanoate[ex] <=>
(S)-lactate_exchange           : 1.0 (S)-lactate[ex] <=>
(R)-lactate_exchange           : 1.0 (R)-lactate[ex] <=>
isocaproate_exchange           : 1.0 isocaproate[ex] <=>
(R)-3-hydroxybutanoate_exchange : 1.0 (R)-3-hydroxybutanoate[ex] <=>

indole-3-acetate_exchange      : 1.0 indole-3-acetate[ex] <=>
4-hydroxyphenylacetate_exchange : 1.0 4-hydroxyphenylacetate[ex] <=>
phenylacetate_exchange         : 1.0 phenylacetate[ex] <=>
4-imidazoleacetate_exchange    : 1.0 4-imidazoleacetate[ex] <=>

3-phenylpropanoate_exchange    : 1.0 3-phenylpropanoate[ex] <=>
3-(4-hydroxyphenyl)propanoate_exchange : 1.0 3-(4-hydroxyphenyl)propanoate[ex] <=>

isobutyrate_exchange           : 1.0 isobutyrate[ex] <=>
isovalerate_exchange           : 1.0 isovalerate[ex] <=>
2-methylbutanoate_exchange     : 1.0 2-methylbutanoate[ex] <=>
#####
#TRANSPORT
#####
#Diffusion

H2O_transport                  : 1.0 H2O <=> 1.0 H2O[ex]
H2_transport                   : 1.0 H2 <=> 1.0 H2[ex]
CO2_transport                  : 1.0 CO2 <=> 1.0 CO2[ex]
CO_transport                   : 1.0 carbon_monoxide <=> 1.0 carbon_monoxide[ex]
H2S_transport                  : 1.0 hydrogen_sulfide <=> hydrogen_sulfide[ex]
methanethiol_transport         : 1.0 methanethiol <=> 1.0 methanethiol[ex]

#No ammonium transporter (amtB/nrgA)
#Ammonium can diffuse with the gradient across the membrane (Kleiner 1985)
#Usually no import necessary due to amino acid degradation
spontaneous_no-pathway_RXN-11811 : 1.0 ammonia + 1.0 H+ <=> 1.0 ammonium # metacyc
ammonia_transport               : 1.0 ammonia <=> 1.0 ammonia[ex]
spontaneous_no-pathway_RXN-11811[ex] : 1.0 ammonia[ex] + 1.0 H+[ex] <=> 1.0 ammonium[ex] # metacyc

#Diffusion as uncharged molecule assumed
spontaneous_sulfite_dissotiation : 1.0 sulfite + 2.0 H+ <=> 1.0 SO2 + H2O
sulfite_transport               : 1.0 SO2 <=> 1.0 SO2[ex]
spontaneous_sulfite_dissotiation[ex] : 1.0 sulfite[ex] + 2.0 H+[ex] <=> 1.0 SO2[ex] + H2O[ex]

#Diffusion as uncharged molecule assumed
spontaneous_selenide_dissotiation : 1.0 hydrogen_selenide <=> 2.0 H+ + 1.0 selenide
selenide_transport               : 1.0 hydrogen_selenide <=> 1.0 hydrogen_selenide[ex]
spontaneous_selenide_dissotiation[ex] : 1.0 hydrogen_selenide[ex] <=> 2.0 H+[ex] + 1.0 selenide[ex]

#products
ethanol_transport               : 1.0 ethanol <=> 1.0 ethanol[ex]
propanol_transport              : 1.0 n-propanol <=> 1.0 n-propanol[ex]
butanol_transport               : 1.0 n-butanol <=> 1.0 n-butanol[ex]
isobutanol_transport            : 1.0 isobutanol <=> 1.0 isobutanol[ex]
4-methylphenol_transport        : 1.0 4-methylphenol <=> 1.0 4-methylphenol[ex]
acetone_transport               : 1.0 acetone <=> 1.0 acetone[ex]

#small-quantity products/deadends
aminoaceton_transport           : 1.0 aminoacetone <=> 1.0 aminoacetone[ex]

```

```

urea_transport : 1.0 urea <=> 1.0 urea[ex]
THMF_transport : 1.0 (2R,4S)-2-methyl-2,3,3,4-tetrahydroxytetrahydrofuran <=> 1.0 (2R,4S)-2-methyl-2,3,3,4-tetrahydroxytetrahydrofuran[ex]
S-methyl-5-thio-D-ribose_transport : 1.0 S-methyl-5-thio-D-ribose <=> 1.0 S-methyl-5-thio-D-ribose[ex]
S-methyl-5-thio-alpha-D-ribose_1-phosphate_transport : 1.0 S-methyl-5-thio-alpha-D-ribose_1-phosphate <=> 1.0 S-methyl-5-thio-alpha-D-ribose_1-phosphate[ex]
5-deoxy-D-ribose_transport : 1.0 5-deoxy-D-ribose <=> 1.0 5-deoxy-D-ribose[ex]
glycolaldehyde_transport : 1.0 glycolaldehyde <=> 1.0 glycolaldehyde[ex]
#####
#Weak acids

##CDIF630erm_03708, CDIF630erm_02463
formate_transport : 1.0 H+ + 1.0 formate <=> 1.0 formate[ex] + 1.0 H+[ex]
acetate_transport : 1.0 H+ + 1.0 acetate <=> 1.0 acetate[ex] + 1.0 H+[ex]
propanoate_transport : 1.0 H+ + 1.0 propanoate <=> 1.0 propanoate[ex] + 1.0 H+[ex]
n-butanoate_transport : 1.0 H+ + 1.0 butanoate <=> 1.0 butanoate[ex] + 1.0 H+[ex]
pentanoate_transport : 1.0 H+ + 1.0 pentanoate <=> 1.0 pentanoate[ex] + 1.0 H+[ex]
hexanoate_transport : 1.0 H+ + 1.0 hexanoate <=> 1.0 hexanoate[ex] + 1.0 H+[ex]
(R)-3-hydroxybutanoate_transport : 1.0 H+ + 1.0 (R)-3-hydroxybutanoate <=> 1.0 (R)-3-hydroxybutanoate[ex] + 1.0 H+[ex]
##CDIF630erm_00920
(S)-lactate_transport : 1.0 Na+ + 1.0 (S)-lactate <=> 1.0 (S)-lactate[ex] + 1.0 Na+[ex]
(R)-lactate_transport : 1.0 Na+ + 1.0 (R)-lactate <=> 1.0 (R)-lactate[ex] + 1.0 Na+[ex]

indole-3-acetate_transport : 1.0 H+ + 1.0 indole-3-acetate <=> 1.0 indole-3-acetate[ex] + 1.0 H+[ex]
4-hydroxyphenylacetate_transport : 1.0 H+ + 1.0 4-hydroxyphenylacetate <=> 1.0 4-hydroxyphenylacetate[ex] + 1.0 H+[ex]
phenylacetate_transport : 1.0 H+ + 1.0 phenylacetate <=> 1.0 phenylacetate[ex] + 1.0 H+[ex]
4-imidazoleacetate_transport : 1.0 H+ + 1.0 4-imidazoleacetate <=> 1.0 4-imidazoleacetate[ex] + 1.0 H+[ex]

3-phenylpropanoate_transport : 1.0 H+ + 1.0 3-phenylpropanoate <=> 3-phenylpropanoate[ex] + 1.0 H+[ex]
3-(4-hydroxyphenyl)propanoate_transport : 1.0 H+ + 1.0 3-(4-hydroxyphenyl)propanoate <=> 3-(4-hydroxyphenyl)propanoate[ex] + 1.0 H+[ex]

isobutyrate_transport : 1.0 H+ + 1.0 isobutyrate <=> 1.0 isobutyrate[ex] + 1.0 H+[ex]
isovalerate_transport : 1.0 H+ + 1.0 isovalerate <=> 1.0 isovalerate[ex] + 1.0 H+[ex]
2-methylbutanoate_transport : 1.0 H+ + 1.0 2-methylbutanoate <=> 1.0 2-methylbutanoate[ex] + 1.0 H+[ex]
isocaproate_transport : 1.0 H+ + 1.0 isocaproate <=> 1.0 isocaproate[ex] + 1.0 H+[ex]
#####
#Amino acids

##CDIF630erm_02711; CDIF630erm_01724
threonine_antiport : 1.0 L-serine[ex] + 1.0 L-threonine <=> 1.0 L-serine + 1.0 L-threonine[ex]

##CDIF630erm_02948
serine_transport : 1.0 Na+ + 1.0 L-serine <=> 1.0 Na+[ex] + 1.0 L-serine[ex]
threonine_transport : 1.0 Na+ + 1.0 L-threonine <=> 1.0 Na+[ex] + 1.0 L-threonine[ex]

##CDIF630erm_02511, CDIF630erm_02664
alanine_transport : 1.0 Na+ + 1.0 L-alanine <=> 1.0 Na+[ex] + 1.0 L-alanine[ex]
#glycine similar to alanine
glycine_transport : 1.0 Na+ + 1.0 glycine <=> 1.0 Na+[ex] + 1.0 glycine[ex]

##CDIF630erm_02521, CDIF630erm_02522; CDIF630erm_02958; CDIF630erm_01412; CDIF630erm_01413; CDIF630erm_00949
valine_transport : 1.0 Na+ + 1.0 L-valine <=> 1.0 Na+[ex] + 1.0 L-valine[ex]
leucine_transport : 1.0 Na+ + 1.0 L-leucine <=> 1.0 Na+[ex] + 1.0 L-leucine[ex]
isoleucine_transport : 1.0 Na+ + 1.0 L-isoleucine <=> 1.0 Na+[ex] + 1.0 L-isoleucine[ex]

##CDIF630erm_02197
tryptophan_transport : 1.0 Na+ + 1.0 L-tryptophan <=> 1.0 Na+[ex] + 1.0 L-tryptophan[ex]

##CDIF630erm_00949? Used by the Leu-Operon; CDIF630erm_02197? Similar to trp
tyrosine_transport : 1.0 Na+ + 1.0 L-tyrosine <=> 1.0 Na+[ex] + 1.0 L-tyrosine[ex]
phenylalanine_transport : 1.0 Na+ + 1.0 L-phenylalanine <=> 1.0 Na+[ex] + 1.0 L-phenylalanine[ex]

##CDIF630erm_01940
glutamate_transport : 1.0 Na+ + 1.0 L-glutamate <=> 1.0 L-glutamate[ex] + 1.0 Na+[ex]

#Transport unknown, Na+ symport as a guess

```

```

proline_transport      : 1.0 Na+ + 1.0 L-proline <=> 1.0 Na+[ex] + 1.0 L-proline[ex]
cysteine_transport    : 1.0 Na+ + 1.0 L-cysteine <=> 1.0 Na+[ex] + 1.0 L-cysteine[ex]
lysine_transport      : 1.0 Na+ + 1.0 L-lysine <=> 1.0 Na+[ex] + 1.0 L-lysine[ex]
5-aminopentanoate_transport : 1.0 Na+ + 1.0 5-aminopentanoate <=> 1.0 Na+[ex] + 1.0 5-aminopentanoate[ex]
2-aminobutanoate_transport : 1.0 Na+ + 1.0 (S)-2-aminobutanoate <=> 1.0 Na+[ex] + 1.0 (S)-2-aminobutanoate[ex]
beta-alanine_transport : 1.0 Na+ + 1.0 beta-alanine <=> 1.0 Na+[ex] + 1.0 beta-alanine[ex]
(R)-pantothenate_transport : 1.0 Na+ + 1.0 (R)-pantothenate <=> 1.0 Na+[ex] + 1.0 (R)-pantothenate[ex]
(R)-3-amino-2-methylpropanoate_transport : 1.0 Na+ + 1.0 (R)-3-amino-2-methylpropanoate <=> 1.0 Na+[ex] + 1.0 (R)-3-amino-2-methylpropanoate

#CDIF630erm_00868-CDIF630erm_00870
arginine_3.6.3._transport : 1.0 H2O + 1.0 ATP + 1.0 L-arginine[ex] --> 1.0 H+ + 1.0 phosphate + 1.0 ADP + 1.0 L-arginine

##CDIF630erm_01654-CDIF630erm_01656
methionine_transport      : 1.0 L-methionine[ex] + 1.0 H2O + 1.0 ATP --> 1.0 ADP + 1.0 L-methionine + 1.0 phosphate + 1.0 H+

#unknown, ABC-transporter is a guess
##CDIF630erm_01972-CDIF630erm_01974?; CDIF630erm_00868-CDIF630erm_00870?
aspartate_transport      : 1.0 H2O + 1.0 L-aspartate[ex] + 1.0 ATP --> 1.0 L-aspartate + 1.0 ADP + 1.0 phosphate + 1.0 H+
histidine_transport      : 1.0 H2O + 1.0 ATP + 1.0 L-histidine[ex] --> 1.0 H+ + 1.0 phosphate + 1.0 ADP + 1.0 L-histidine
pyridoxine_transport     : 1.0 H2O + 1.0 ATP + 1.0 pyridoxine[ex] --> 1.0 H+ + 1.0 phosphate + 1.0 ADP + 1.0 pyridoxine
#####
#ABC-Transport

phosphate_transport      : 1.0 H2O + 1.0 ATP + 1.0 phosphate[ex] --> 1.0 ADP + 2.0 phosphate + 1.0 H+

Ni2+_transport          : 1.0 H2O + 1.0 ATP + 1.0 Ni2+[ex] --> 1.0 Ni2+ + 1.0 ADP + 1.0 phosphate + 1.0 H+
#CDIF630erm_00452-CDIF630erm_00455
Co2+_transport_3.6.3.2_3.6.3.5 : 1.0 H2O + 1.0 Co2+[ex] + 1.0 ATP --> 1.0 phosphate + 1.0 ADP + 1.0 Co2+ + 1.0 H+
Mg2+_transport_3.6.3.2_ : 1.0 H2O + 1.0 Mg2+[ex] + 1.0 ATP --> 1.0 Mg2+ + 1.0 phosphate + 1.0 ADP + 1.0 H+
Fe3+_transport_3.6.3.30 : 1.0 ATP + 1.0 Fe3+[ex] + 1.0 H2O --> 1.0 ADP + 1.0 Fe3+ + 1.0 phosphate + 1.0 H+
K+_transport_3.6.3.12  : 1.0 H2O + 1.0 K+[ex] + 1.0 ATP --> 1.0 K+ + 1.0 phosphate + 1.0 ADP + 1.0 H+
Ca2+_transport_3.6.3.8 : 1.0 ATP + 1.0 H2O + 1.0 Ca2+[ex] --> 1.0 phosphate + 1.0 ADP + 1.0 Ca2+ + 1.0 H+
##CDIF630erm_00989-CDIF630erm_00991
molybdate_transport_3.6.3.29 : 1.0 H2O + 1.0 ATP + 1.0 molybdate[ex] --> 1.0 phosphate + 1.0 ADP + 1.0 molybdate + 1.0 H+
##CDIF630erm_01641 - CDIF630erm_01643; CDIF630erm_01684, CDIF630erm_01685; CDIF630erm_01939; CDIF630erm_03573, CDIF630erm_03574
Fe2+_transport          : 1.0 GTP + 1.0 H2O + 1.0 Fe2+[ex] --> 1.0 phosphate + 1.0 H+ + 1.0 GDP + 1.0 Fe2+
Cd2+_transport_3.6.3.3 : 1.0 H2O + 1.0 ATP + 1.0 Cd2+[ex] <=> 1.0 Cd2+ + 1.0 ADP + 1.0 phosphate + 1.0 H+
Zn2+_transport_3.6.3.5 : 1.0 Zn2+[ex] + 1.0 ATP + 1.0 H2O --> 1.0 Zn2+ + 1.0 phosphate + 1.0 ADP + 1.0 H+

#####
#Other

##CDIF630erm_03256
biotin_transport        : 1.0 biotin[ex] <=> 1.0 biotin

##CDIF630erm_02351
Mg2+_transport          : 1.0 Mg2+[ex] <-- 1.0 Mg2+

##CDIF630erm_01919
P04/Na_transport        : 1.0 Na+[ex] + 1.0 phosphate[ex] <=> 1.0 Na+ + 1.0 phosphate

##CDIF630erm_02923; CDIF630erm_02325; CDIF630erm_03939
potassium_transport     : 1.0 K+[ex] + 1.0 H+ <=> 1.0 K+ + 1.0 H+[ex]

#####
#Proton and Na+ transport

#10 c-subunits (9-12 normal?) in E.coli (Jiang et al., 2001) --> 3.3 H+/ATP
#F-type-ATPase_transport_3.6.3.14_mod_ATPSYN-RXN : 1.0 H2O + 1.0 ATP + 2.33333 H+ <=> 1.0 phosphate + 1.0 ADP + 3.33333 H+[ex]
#F-type-ATPase_transport_3.6.3.14_mod_ATPSYN-RXN : 1.0 H2O + 1.0 ATP + 2.66667 H+ <=> 1.0 phosphate + 1.0 ADP + 3.66667 H+[ex]
#F-type-ATPase_transport_3.6.3.14_mod_ATPSYN-RXN : 1.0 H2O + 1.0 ATP + 3 H+ <=> 1.0 phosphate + 1.0 ADP + 4 H+[ex]
F-type-ATPase_transport_3.6.3.14_mod_ATPSYN-RXN : 1.0 H2O + 1.0 ATP + 3.33333 H+ <=> 1.0 phosphate + 1.0 ADP + 4.33333 H+[ex]

```

```

#Subunit K is highly similar to E. hirae; E. hirae has 10 K-subunits per ATPase (Murata et al., 2005) --> 3.3 Na+/ATP
#V-type-ATPase_transport_3.6.3.15_mod_3.6.3.15-RXN : 1.0 H2O + 1.0 ATP + 3.33333 Na+ <=> 1.0 phosphate + 1.0 ADP + 3.33333 Na+[ex] + 1.0 H+
#V-type-ATPase_transport_3.6.3.15_mod_3.6.3.15-RXN : 1.0 H2O + 1.0 ATP + 3.66667 Na+ <=> 1.0 phosphate + 1.0 ADP + 3.66667 Na+[ex] + 1.0 H+
#V-type-ATPase_transport_3.6.3.15_mod_3.6.3.15-RXN : 1.0 H2O + 1.0 ATP + 4 Na+ <=> 1.0 phosphate + 1.0 ADP + 4 Na+[ex] + 1.0 H+
V-type-ATPase_transport_3.6.3.15_mod_3.6.3.15-RXN : 1.0 H2O + 1.0 ATP + 4.33333 Na+ <=> 1.0 phosphate + 1.0 ADP + 4.33333 Na+[ex] + 1.0 H+

##CDIF630erm_01284-CDIF630erm_01289
#Proton dependence assumed because the Rnf-complex of C. ljungdahlii is proton dependent (Tremblay et al., 2013)
#Reversible in vitro in A. woodii (Hess et al., 2013)
rnfABCDEG_transport : 2.0 |Reduced-ferredoxins| + 1.0 NAD+ + 3.0 H+ <=> 2.0 |Oxidized-ferredoxins| + 1.0 NADH + 2.0 H+[ex]

##CDIF630erm_00770; CDIF630erm_02996; CDIF630erm_02923
sodium_transport : 1.0 Na+[ex] + 1.0 H+ <=> 1.0 Na+ + 1.0 H+[ex]

#####Glucose PTS-system#####
PTS-system_2.7.3.9_2.7.3.9-RXN : 1.0 phosphoenolpyruvate + 1.0 |PTS-I-Histidines| --> 1.0 pyruvate + 1.0 |PTS-I-pi-phospho-L-histidines| # source:
MetaCyc (queried 2.7.3.9)
glucose_transport_2.7.1.199 : 1.0 |PTS-I-pi-phospho-L-histidines| + 1.0 D-glucose[ex] --> 1.0 |PTS-I-Histidines| + 1.0 D-glucose_6-phosphate
#####
#glycolysis I:

glycolysis-I/1_5.3.1.9_PGLUCISOM-RXN : 1.0 D-glucose_6-phosphate <=> 1.0 beta-D-fructofuranose_6-phosphate # source: MetaCyc, BRENDA, KEGG (queried
5.3.1.9)
glycolysis-I/2b_3.1.3.11_F16BDEPHOS-RXN : 1.0 fructose_1,6-bisphosphate + 1.0 H2O --> 1.0 beta-D-fructofuranose_6-phosphate + 1.0 phosphate # source: MetaCyc,
BRENDA, KEGG (queried 3.1.3.11)
glycolysis-I/2a_2.7.1.11_6PFRUCTPHOS-RXN : 1.0 beta-D-fructofuranose_6-phosphate + 1.0 ATP --> 1.0 fructose_1,6-bisphosphate + 1.0 H+ + 1.0 ADP # source:
MetaCyc, BRENDA, KEGG (queried 2.7.1.11)
glycolysis-I/3_4.1.2.13_F16ALDOLASE-RXN : 1.0 fructose_1,6-bisphosphate <=> 1.0 D-glyceraldehyde_3-phosphate + 1.0 glyceraldehyde_3-phosphate # source: MetaCyc,
BRENDA, KEGG (queried 4.1.2.13)
glycolysis-I/p4_5.3.1.1_TRIOSEPISEMERIZATION-RXN : 1.0 D-glyceraldehyde_3-phosphate <=> 1.0 glyceraldehyde_3-phosphate # source: MetaCyc, BRENDA, KEGG (queried 5.3.1.1)
glycolysis-I/4_1.2.1.12_GAPDHSYNEC-RXN_WOP : 1.0 D-glyceraldehyde_3-phosphate + 1.0 phosphate + 1.0 NAD+ <=> 1.0 1,3-bisphospho-D-glycerate + 1.0 NADH + 1.0 H+ #
source: MetaCyc, BRENDA, KEGG (queried 1.2.1.12) // other EC numbers for this reaction: 1.2.1.13, 1.2.1.59
glycolysis-I/5_2.7.2.3_PHOSGLYPHOS-RXN : 1.0 3-phospho-D-glycerate + 1.0 ATP <=> 1.0 ADP + 1.0 1,3-bisphospho-D-glycerate # source: MetaCyc, BRENDA, KEGG
(queried 2.7.2.3)
glycolysis-I/6_5.4.2.12_3PGAREARR-RXN : 1.0 2-phospho-D-glycerate <=> 1.0 3-phospho-D-glycerate # source: MetaCyc, BRENDA, KEGG (queried 5.4.2.12) // other
EC numbers for this reaction: 5.4.2.11
glycolysis-I/7_4.2.1.11_2PGADEHYDRAT-RXN : 1.0 2-phospho-D-glycerate <=> 1.0 H2O + 1.0 phosphoenolpyruvate # source: MetaCyc, BRENDA, KEGG (queried 4.2.1.11)
glycolysis-I/8_2.7.1.40_PEPDEPHOS-RXN : 1.0 ATP + 1.0 pyruvate <=> 1.0 phosphoenolpyruvate + 1.0 ADP + 1.0 H+ # source: MetaCyc, BRENDA, KEGG (queried
2.7.1.40)

#glycolysis IV
glycolysis-IV/2c_2.7.1.90_2.7.1.90-RXN : 1.0 diphosphate + 1.0 beta-D-fructofuranose_6-phosphate <=> 1.0 fructose_1,6-bisphosphate + 1.0 phosphate + 1.0 H+ #
source: MetaCyc, BRENDA, KEGG (queried 2.7.1.90)
glycolysis-IV/4b_1.2.1.9_1.2.1.9-RXN : 1.0 NADP+ + 1.0 H2O + 1.0 D-glyceraldehyde_3-phosphate --> 1.0 3-phospho-D-glycerate + 2.0 H+ + 1.0 NADPH # source:
MetaCyc, BRENDA, KEGG (queried 1.2.1.9) // other EC numbers for this reaction: 1.2.1.90
#
glycolysis-C/8b_2.7.9.1_PYRUVATEORTHOPHOSPHATE-DIKINASE-RXN : 1.0 phosphate + 1.0 ATP + 1.0 pyruvate --> 1.0 diphosphate + 1.0 phosphoenolpyruvate + 1.0 H+ + 1.0 AMP # source:
MetaCyc, BRENDA, KEGG (queried 2.7.9.1)
#####
#methylglyoxal-degradation-I
#S-lactoyl-glutathione not found in all tested Clostridia (Fahey et al., 1978) and no 6.3.2.2/3 found in Cdiff; probably other coenzyme

methylglyoxal-degradation-I/p1_4.2.3.3_METHGLYSYN-RXN : 1.0 glyceraldehyde_3-phosphate --> 1.0 methylglyoxal + 1.0 phosphate # source: MetaCyc, BRENDA, KEGG (queried 4.2.3.3)
methylglyoxal-degradation-I/1_4.4.1.5_GLYOXI-RXN : 1.0 (R)-S-lactoylglutathione <=> 1.0 methylglyoxal + 1.0 glutathione # source: MetaCyc, BRENDA, KEGG (queried
4.4.1.5)
methylglyoxal-degradation-I/2_3.1.2.6_GLYOXII-RXN : 1.0 H2O + 1.0 (R)-S-lactoylglutathione --> 1.0 glutathione + 1.0 (R)-lactate + 1.0 H+ # source: MetaCyc, BRENDA,
KEGG (queried 3.1.2.6)
#####
#Wood-Ljungdahl
#Pathway can act in the reverse direction (Spormann and Thauer, 1988, Schauder et al., 1988)

#Reversible in C. cylindrosporium (Curthoys and Rabinowitz, 1972)
Wood-Ljungdahl/1_moddir_6.3.4.3_FORMATETHFLIG-RXN : 1.0 formate + 1.0 ATP + 1.0 tetrahydropteroyl_tri-L-glutamate <=> 1.0 ADP + 1.0 10-formyltetrahydrofolate + 1.0
phosphate # source: MetaCyc (queried 6.3.4.3)

```

Wood-Ljungdahl/2\_moddir\_3.5.4.9\_METHENYLTHFCYCLOHYDRO-RXN : 1.0 5,10-methenyltetrahydrofolate + 1.0 H2O <=> 1.0 H+ + 1.0 10-formyltetrahydrofolate # source: MetaCyc, BRENDA, KEGG (queried 3.5.4.9)

Wood-Ljungdahl/3\_1.5.1.5\_METHYLENETHFDEHYDROG-NADP-RXN : 1.0 5,10-methylene-tetrahydrofolate + 1.0 NADP+ <=> 1.0 5,10-methenyltetrahydrofolate + 1.0 NADPH # source: MetaCyc, BRENDA, KEGG (queried 1.5.1.5)

#Bifurcating methylene-tetrahydrofolate reductase as proposed C. ljungdahlii and C. autoethanogenum (Köpke et al. 2010, Nagarajan et al. 2013, Mock et al. 2015)

Wood-Ljungdahl/4\_manual\_1.5.-\_HD-MetFV : 1.0 N5-methyl-tetrahydrofolate + 2.0 |Reduced-ferredoxins| + 2.0 NAD+ <-- 1.0 5,10-methylene-tetrahydrofolate + 2.0 NADH + 2.0 |Oxidized-ferredoxins|

Wood-Ljungdahl/5\_2.1.1.258\_METHCOCLTH-RXN : 1.0 |Methylated-corrinoid-Fe-S-Proteins| + 1.0 tetrahydropteroyl-tri-L-glutamate <=> 1.0 H+ + 1.0 |CoI-Corrinoid-Fe-S-proteins| + 1.0 N5-methyl-tetrahydrofolate # source: MetaCyc (queried 2.1.1.258)

#CDIF630erm\_00832: 1.2.7.4 in Wood-Ljungdahl-Operon; production of CO with Ferredoxins used; only <-- because of CO degradation (see below)

Wood-Ljungdahl/p6\_moddir\_1.2.7.4\_1.2.7.4-RXN : 1.0 H2O + 1.0 carbon\_monoxide + 2.0 |Oxidized-ferredoxins| <-- 2.0 H+ + 1.0 CO2 + 2.0 |Reduced-ferredoxins| # source: MetaCyc, KEGG (queried 1.2.7.4) // other EC numbers for this reaction: 1.2.99.2

Wood-Ljungdahl/6\_2.3.1.169\_ACETYLSYNCLTH-RXN : 1.0 H+ + 1.0 acetyl-CoA + 1.0 |CoI-Corrinoid-Fe-S-proteins| <=> 1.0 |Methylated-corrinoid-Fe-S-Proteins| + 1.0 coenzyme\_A + 1.0 carbon\_monoxide # source: MetaCyc, BRENDA (queried 2.3.1.169)

#####

#CO degradation C (CDIF630erm\_00296-CDIF630erm\_00298)

CO-drgradation-C\_manual\_HD-CO-DEHYD : 1.0 carbon\_monoxide + 1.0 H2O + 1.0 NAD+ --> 1.0 CO2 + 1.0 NADH + 1.0 H+

#####

#Dihydrogen

dihydrogen-production-A\_moddir\_1.12.7.2\_HYDROG-RXN : 2.0 |Oxidized-ferredoxins| + 1.0 H2 <-- 2.0 H+ + 2.0 |Reduced-ferredoxins| # source: MetaCyc, KEGG (queried 1.12.7.2) // other EC numbers for this reaction: 1.12.99

#Homolog to the bifurcating hydrogenase of T. maritima (Schut and Adams, 2009)

dihydrogen-production-B\_manual\_1.12.1.-\_HD-Bifur-Hyd : 2.0 |Oxidized-ferredoxins| + 2.0 H2 + 1.0 NADP+ <=> 3.0 H+ + 1.0 NADPH + 2.0 |Reduced-ferredoxins|

#CDIF630erm\_03614-CDIF630erm\_03619 (Calusinska et al. 2010)

dihydrogen-production-C\_manual\_1.1.99.33\_1.12.1.3\_HD-Form-Hyd : 1.0 H+ + 1.0 formate --> 1.0 CO2 + 1.0 H2

#####

#ppp non-ox

ppp-non-ox/1a\_5.3.1.6\_RIB5PISOM-RXN : 1.0 D-ribose\_5-phosphate <=> 1.0 D-ribulose\_5-phosphate # source: MetaCyc, BRENDA, KEGG (queried 5.3.1.6)

ppp-non-ox/1b\_5.1.3.1\_RIBULP3EPIM-RXN : 1.0 D-ribulose\_5-phosphate <=> 1.0 D-xylulose\_5-phosphate # source: MetaCyc, BRENDA, KEGG (queried 5.1.3.1)

ppp-non-ox/2\_2.2.1.1\_R06863 : 1.0 thiamine\_diphosphate + 1.0 D-sedoheptulose\_7-phosphate <=> 1.0 D-ribose\_5-phosphate + 1.0 alpha,beta-Dihydroxyethyl-TPP # source: KEGG (queried 2.2.1.1)

ppp-non-ox/3\_2.2.1.1\_R06861 : 1.0 D-xylulose\_5-phosphate + 1.0 thiamine\_diphosphate <=> 1.0 D-glyceraldehyde\_3-phosphate + 1.0 alpha,beta-Dihydroxyethyl-TPP # source: KEGG (queried 2.2.1.1) // other EC numbers for this reaction: 2.2.1.3

ppp-non-ox/4\_2.2.1.2\_TRANSALDOL-RXN : 1.0 D-glyceraldehyde\_3-phosphate + 1.0 D-sedoheptulose\_7-phosphate <=> 1.0 beta-D-fructofuranose\_6-phosphate + 1.0 D-erythrose\_4-phosphate # source: MetaCyc, BRENDA, KEGG (queried 2.2.1.2)

ppp-non-ox/5\_2.2.1.1\_2TRANSKETO-RXN : 1.0 D-xylulose\_5-phosphate + 1.0 D-erythrose\_4-phosphate <=> 1.0 D-glyceraldehyde\_3-phosphate + 1.0 beta-D-fructofuranose\_6-phosphate # source: MetaCyc, BRENDA, KEGG (queried 2.2.1.1) // other EC numbers for this reaction: 2.2.1.3

PRPP-biosynthesis-I\_2.7.6.1\_PRPPSYN-RXN : 1.0 D-ribose\_5-phosphate + 1.0 ATP <=> 1.0 H+ + 1.0 AMP + 1.0 5-phospho-alpha-D-ribose\_1-diphosphate # source: MetaCyc, BRENDA, KEGG (queried 2.7.6.1)

#side reactions

sedoheptulose-bisphosphate-bypass\_2.7.1.11\_RXN0-6541 : 1.0 D-sedoheptulose\_7-phosphate + 1.0 ATP --> 1.0 ADP + 1.0 D-sedoheptulose-1,7-bisphosphate + 1.0 H+ # source: MetaCyc, KEGG (queried 2.7.1.11) // other EC numbers for this reaction: 2.7.1

sedoheptulose-bisphosphate-bypass\_4.1.2.13\_SEDOBISALDOL-RXN : 1.0 glycerone\_phosphate + 1.0 D-erythrose\_4-phosphate <=> 1.0 D-sedoheptulose-1,7-bisphosphate # source: MetaCyc, BRENDA, KEGG (queried 4.1.2.13) // other EC numbers for this reaction: 4.1.2

Calvin-Benson-Bassham-cycle\_3.1.3.11\_SEDOHEPTULOSE-BISPHOSPHATASE-RXN : 1.0 H2O + 1.0 D-sedoheptulose-1,7-bisphosphate --> 1.0 D-sedoheptulose\_7-phosphate + 1.0 phosphate # source: MetaCyc, BRENDA, KEGG (queried 3.1.3.11) // other EC numbers for this reaction: 3.1.3.37

#####

#TCA

TCA-cycle/1\_4.2.1.1\_CARBODEHYDRAT-RXN : 1.0 hydrogen\_carbonate <=> 1.0 CO2 + 1.0 H2O # source: MetaCyc, BRENDA, KEGG (queried 4.2.1.1)

TCA-cycle/2\_6.4.1.1\_PYRUVATE-CARBOXYLASE-RXN : 1.0 hydrogen\_carbonate + 1.0 ATP + 1.0 pyruvate --> 1.0 phosphate + 1.0 oxaloacetate + 1.0 ADP + 1.0 H+ # source: MetaCyc, BRENDA, KEGG (queried 6.4.1.1)

TCA-cycle/3\_2.3.3.3\_CITSYN-RXN : 1.0 H2O + 1.0 acetyl-CoA + 1.0 oxaloacetate --> 1.0 H+ + 1.0 coenzyme\_A + 1.0 citrate # source: MetaCyc, BRENDA, KEGG (queried 2.3.3.3) // other EC numbers for this reaction: 2.3.3.16, 2.3.3.1

TCA-cycle/4\_4.2.1.3\_ACONITATEDEHYDR-RXN : 1.0 citrate <=> 1.0 H2O + 1.0 cis-aconitate # source: MetaCyc, BRENDA, KEGG (queried 4.2.1.3)

TCA-cycle/5\_4.2.1.3\_ACONITATEHYDR-RXN : 1.0 cis-aconitate + 1.0 H2O <=> 1.0 D-threo-isocitrate # source: MetaCyc, BRENDA, KEGG (queried 4.2.1.3)

TCA-cycle/6\_1.1.1.41\_ISOCITRATE-DEHYDROGENASE-NAD+-RXN : 1.0 D-threo-isocitrate + 1.0 NAD+ --> 1.0 NADH + 1.0 2-oxoglutarate + 1.0 CO2 # source: MetaCyc, BRENDA, KEGG (queried 1.1.1.41) // other EC numbers for this reaction: 1.1.1.286

TCA-cycle/7\_4.2.1.2\_FUMHYDR-RXN : 1.0 (S)-malate <=> 1.0 H2O + 1.0 fumarate # source: MetaCyc, BRENDA, KEGG (queried 4.2.1.2)

TCA-cycle/8\_1.1.1.38\_1.1.1.39-RXN : 1.0 (S)-malate + 1.0 NAD+ --> 1.0 NADH + 1.0 CO2 + 1.0 pyruvate # source: MetaCyc, BRENDA, KEGG (queried 1.1.1.38) // other EC numbers for this reaction: 1.1.1.39, 1.3.1.7

TCA-cycle/9\_1.1.1.38\_OXALODECARB-RXN : 1.0 H+ + 1.0 oxaloacetate --> 1.0 CO2 + 1.0 pyruvate # source: MetaCyc, BRENDA, KEGG (queried 1.1.1.38) // other EC

```

numbers for this reaction: 1.1.1.40, 4.1.1.3
#####
#Fatty acids I

#C. kluyveri complex characterized (Wang et al., 2010)
NADP-reduction_manual_HD-NfnAB : 2.0 |Reduced-ferredoxins| + 1.0 NADH + 2.0 NADP+ + 1.0 H+ <=> 2.0 |Oxidized-ferredoxins| + 1.0 NAD+ + 2.0 NADPH

fatty-acid-I/1_6.4.1.2_ACETYL-COA-CARBOXYLTRANSFER-RXN : 1.0 hydrogen_carbonate + 1.0 ATP + 1.0 acetyl-CoA --> 1.0 ADP + 1.0 H+ + 1.0 phosphate + 1.0 malonyl-CoA # source:
MetaCyc, BRENDA, KEGG (queried 6.4.1.2)
fatty-acid-I/2_2.3.1.39_MALONYL-COA-ACP-TRANSACYL-RXN : 1.0 malonyl-CoA + 1.0 Acyl-carrier_protein <=> 1.0 coenzyme_A + 1.0 Malonyl-[acyl-carrier_protein] # source:
MetaCyc, BRENDA, KEGG (queried 2.3.1.39) // other EC numbers for this reaction: 2.3.1, 2.3.1.86, 2.3.1.85

#chain lenght: 16.246
#unsaturated: 0.164
#from C. difficile NCIB 10666 (Elsden et al., 1980)
#2.3.1.41/179/180/n2_1.1.1.100_1.3.1.9_4.2.1.59
fatty-acid-I/3a_manual_HD-acet : 1.0 acetyl_phosphate + 7.123 Malonyl-[acyl-carrier_protein] + 21.205 H+ + 14.082 NADPH --> 1.0 Acyl-[acyl-
carrier_protein] + 6.123 Acyl-carrier_protein + 7.123 H2O + 7.123 CO2 + 14.082 NADP+ + 1.0 phosphate
fatty-acid-I/3b_manual_HD-prop : 1.0 propanoyl_phosphate + 6.623 Malonyl-[acyl-carrier_protein] + 19.705 H+ + 13.082 NADPH --> 1.0 Acyl-[acyl-
carrier_protein] + 5.623 Acyl-carrier_protein + 6.623 H2O + 6.623 CO2 + 13.082 NADP+ + 1.0 phosphate
fatty-acid-I/3c_manual_HD-but : 1.0 butanoyl_phosphate + 6.123 Malonyl-[acyl-carrier_protein] + 18.205 H+ + 12.082 NADPH --> 1.0 Acyl-[acyl-
carrier_protein] + 5.123 Acyl-carrier_protein + 6.123 H2O + 6.123 CO2 + 12.082 NADP+ + 1.0 phosphate
fatty-acid-I/3d_manual_HD-ibut : 1.0 isobutyryl_phosphate + 6.123 Malonyl-[acyl-carrier_protein] + 18.205 H+ + 12.082 NADPH --> 1.0 Acyl-[acyl-
carrier_protein] + 5.123 Acyl-carrier_protein + 6.123 H2O + 6.123 CO2 + 12.082 NADP+ + 1.0 phosphate
fatty-acid-I/3e_manual_HD-vale : 1.0 pentanoyl_phosphate + 5.623 Malonyl-[acyl-carrier_protein] + 16.705 H+ + 11.082 NADPH --> 1.0 Acyl-[acyl-
carrier_protein] + 4.623 Acyl-carrier_protein + 5.623 H2O + 5.623 CO2 + 11.082 NADP+ + 1.0 phosphate
fatty-acid-I/3f_manual_HD-ival : 1.0 isovaleryl_phosphate + 5.623 Malonyl-[acyl-carrier_protein] + 16.705 H+ + 11.082 NADPH --> 1.0 Acyl-[acyl-
carrier_protein] + 4.623 Acyl-carrier_protein + 5.623 H2O + 5.623 CO2 + 11.082 NADP+ + 1.0 phosphate
fatty-acid-I/3g_manual_HD-aval : 1.0 2-methylbutanoyl_phosphate + 5.623 Malonyl-[acyl-carrier_protein] + 16.705 H+ + 11.082 NADPH --> 1.0 Acyl-[acyl-
carrier_protein] + 4.623 Acyl-carrier_protein + 5.623 H2O + 5.623 CO2 + 11.082 NADP+ + 1.0 phosphate
fatty-acid-I/3h_manual_HD-icap : 1.0 isocaproyl_phosphate + 5.123 Malonyl-[acyl-carrier_protein] + 15.205 H+ + 10.082 NADPH --> 1.0 Acyl-[acyl-
carrier_protein] + 4.123 Acyl-carrier_protein + 5.123 H2O + 5.123 CO2 + 10.082 NADP+ + 1.0 phosphate
fatty-acid-I/3i_manual_HD-hexa : 1.0 hexanoyl_phosphate + 5.123 Malonyl-[acyl-carrier_protein] + 15.205 H+ + 10.082 NADPH --> 1.0 Acyl-[acyl-
carrier_protein] + 4.123 Acyl-carrier_protein + 5.123 H2O + 5.123 CO2 + 10.082 NADP+ + 1.0 phosphate

fatty-acid-I/4_manual_2.3.1.n2_HD-2.3.1.n2 : 1.0 Acyl-[acyl-carrier_protein] + 1.0 phosphate <=> 1.0 fatty_acid_phosphate + 1.0 Acyl-carrier_protein
#####
#CDP-diacylglycerol-biosyn-I

CDP-diacylglycerol-biosyn-I/1_modnames_1.1.1.94_1.1.1.261-RXN : 1.0 sn-glycerol_3-phosphate + 1.0 NADP+ <-- 1.0 H+ + 1.0 glycerone_phosphate + 1.0 NADPH # source: MetaCyc,
BRENDA, KEGG (queried 1.1.1.94) // other EC numbers for this reaction: 1.1.1.261
CDP-diacylglycerol-biosyn-I/2_manual_2.3.1.n3_HD-2.3.1.n3 : 1.0 fatty_acid_phosphate + 1.0 sn-glycerol_3-phosphate <=> 1.0 1-acyl-sn-glycerol_3-phosphate + 1.0
phosphate
CDP-diacylglycerol-biosyn-I/3_2.3.1.51_BS321039 : 1.0 Acyl-[acyl-carrier_protein] + 1.0 1-acyl-sn-glycerol_3-phosphate <=> 1.0 1,2-diacyl-sn-glycerol_3-
phosphate + 1.0 Acyl-carrier_protein # source: MetaCyc, BRENDA, KEGG (queried 2.3.1.51)
CDP-diacylglycerol-biosyn-I/4_2.7.7.41_CDPDIGLYSYN-RXN : 1.0 1,2-diacyl-sn-glycerol_3-phosphate + 1.0 CTP + 1.0 H+ --> 1.0 diphosphate + 1.0 CDP-1,2-diacyl-sn-
glycerol # source: MetaCyc, BRENDA, KEGG (queried 2.7.7.41)
#####
#cardiolipin biosynthesis I
cardiolipin-biosyn-I/1_2.7.8.5_PHOSPHAGLYPSYN-RXN : 1.0 CDP-1,2-diacyl-sn-glycerol + 1.0 sn-glycerol_3-phosphate <=> 1.0 H+ + 1.0 CMP + 1.0
Phosphatidylglycerophosphate # source: MetaCyc, BRENDA, KEGG (queried 2.7.8.5)
cardiolipin-biosyn-I/2_3.1.3.27_PGPPHOSPHA-RXN : 1.0 Phosphatidylglycerophosphate + 1.0 H2O --> 1.0 phosphate + 1.0 Phosphatidylglycerol # source: MetaCyc,
BRENDA, KEGG (queried 3.1.3.27)
cardiolipin-biosyn-I/3_2.7.8.-_CARDIOLIPSYN-RXN : 2.0 Phosphatidylglycerol --> 1.0 a_cardiolipin + 1.0 glycerol # source: MetaCyc, BRENDA, KEGG (queried
2.7.8.-) // other EC numbers for this reaction: 2.7.8.B10, 2.7.8
#####
#glycerol degradation I

glycerol-degradation-I_2.7.1.30_GLYCEROL-KIN-RXN : 1.0 glycerol + 1.0 ATP --> 1.0 ADP + 1.0 sn-glycerol_3-phosphate + 1.0 H+ # source: MetaCyc, BRENDA, KEGG
(queried 2.7.1.30)
#####
#UDP-N-acetyl-D-glucosamine biosynthesis I

UDP-N-acetyl-D-glucosamine-biosyn-I/1_2.6.1.16_L-GLN-FRUCT-6-P-AMINOTRANS-RXN : 1.0 L-glutamine + 1.0 beta-D-fructofuranose_6-phosphate <=> 1.0 D-glucosamine_6-phosphate + 1.0

```



L-glutamate # source: MetaCyc, BRENDA, KEGG (queried 2.6.1.16)  
UDP-N-acetyl-D-glucosamine-biosyn-I/2\_5.4.2.10\_5.4.2.10-RXN : 1.0 D-glucosamine\_6-phosphate <=> 1.0 D-glucosamine\_1-phosphate # source: MetaCyc, BRENDA, KEGG (queried 5.4.2.10)  
UDP-N-acetyl-D-glucosamine-biosyn-I/3\_2.3.1.157\_2.3.1.157-RXN : 1.0 acetyl-CoA + 1.0 D-glucosamine\_1-phosphate --> 1.0 N-acetyl-alpha-D-glucosamine\_1-phosphate + 1.0 coenzyme\_A + 1.0 H+ # source: MetaCyc, BRENDA, KEGG (queried 2.3.1.157)  
UDP-N-acetyl-D-glucosamine-biosyn-I/4\_2.7.7.23\_NAG1P-URIDYLTRANS-RXN : 1.0 H+ + 1.0 UTP + 1.0 N-acetyl-alpha-D-glucosamine\_1-phosphate --> 1.0 UDP-N-acetyl-alpha-D-glucosamine + 1.0 diphosphate # source: MetaCyc, BRENDA, KEGG (queried 2.7.7.23)  
#####  
#UDP-N-acetyl-D-galactosamine biosynthesis I  
UDP-N-acetyl-D-galactosamine-biosyn-I\_5.1.3.2\_UDP-N-ACETYLGLUCOSAMINE-4-EPIMERASE-RXN : 1.0 UDP-N-acetyl-alpha-D-glucosamine <=> 1.0 UDP-N-acetyl-alpha-D-galactosamine # source: MetaCyc, BRENDA, KEGG (queried 5.1.3.2) // other EC numbers for this reaction: 5.1.3.7  
#####  
#GDP-mannose biosyn  
GDP-mannose-biosyn/1\_5.3.1.8\_MANNPISOM-RXN : 1.0 D-mannopyranose\_6-phosphate <=> 1.0 beta-D-fructofuranose\_6-phosphate # source: MetaCyc (queried 5.3.1.8)  
GDP-mannose-biosyn/2\_5.4.2.8\_PHOSMANMUT-RXN : 1.0 alpha-D-mannose\_1-phosphate <=> 1.0 D-mannopyranose\_6-phosphate # source: MetaCyc (queried 5.4.2.8)  
GDP-mannose-biosyn/3\_2.7.7.13\_2.7.7.13-RXN : 1.0 alpha-D-mannose\_1-phosphate + 1.0 H+ + 1.0 GTP --> 1.0 GDP-alpha-D-mannose + 1.0 diphosphate # source: MetaCyc, BRENDA, KEGG (queried 2.7.7.13) // other EC numbers for this reaction: 2.7.7.34, 2.7.7.30  
#####  
#UDP-glucose biosyn  
UDP-glucose-biosyn/1\_5.4.2.2\_5.4.2.8\_PHOSPHOGLUCMUT-RXN : 1.0 alpha-D-glucopyranose\_1-phosphate <=> 1.0 D-glucose\_6-phosphate # source: MetaCyc, BRENDA, KEGG (queried 5.4.2.2, 5.4.2.8) // other EC numbers for this reaction: 5.4.2.5  
UDP-glucose-biosyn/2\_2.7.7.9\_GLUC1PURIDYLTRANS-RXN : 1.0 UTP + 1.0 alpha-D-glucopyranose\_1-phosphate + 1.0 H+ <=> 1.0 UDP-alpha-D-glucose + 1.0 diphosphate # source: MetaCyc, BRENDA, KEGG (queried 2.7.7.9) // other EC numbers for this reaction: 2.7.7.64  
#####  
#peptidoglycan biosynthesis I (meso-diaminopimelate containing)  
peptidoglycan-biosyn-I/1\_2.5.1.7\_UDPACETYLGLUCOSAMENOLPYRTRANS-RXN : 1.0 UDP-N-acetyl-alpha-D-glucosamine + 1.0 phosphoenolpyruvate --> 1.0 phosphate + 1.0 UDP-N-acetyl-alpha-D-glucosamine-enolpyruvate # source: MetaCyc, BRENDA, KEGG (queried 2.5.1.7)  
peptidoglycan-biosyn-I/2\_1.3.1.98\_UDPACETYLMURAMATEDEHYDROG-RXN : 1.0 NADP+ + 1.0 UDP-N-acetyl-alpha-D-muramate <-- 1.0 H+ + 1.0 NADPH + 1.0 UDP-N-acetyl-alpha-D-glucosamine-enolpyruvate # source: MetaCyc, BRENDA, KEGG (queried 1.3.1.98)  
peptidoglycan-biosyn-I/3\_6.3.2.8\_UDP-NACMUR-ALA-LIG-RXN : 1.0 L-alanine + 1.0 ATP + 1.0 UDP-N-acetyl-alpha-D-muramate --> 1.0 phosphate + 1.0 UDP-N-acetyl-alpha-D-muramoyl-L-alanine + 1.0 ADP + 1.0 H+ # source: MetaCyc, BRENDA, KEGG (queried 6.3.2.8)  
D-glutamate\_5.1.1.3\_GLUTRACE-RXN : 1.0 L-glutamate <=> 1.0 D-glutamate # source: MetaCyc, BRENDA, KEGG (queried 5.1.1.3)  
peptidoglycan-biosyn-I/4\_6.3.2.9\_UDP-NACMURALA-GLU-LIG-RXN : 1.0 D-glutamate + 1.0 UDP-N-acetyl-alpha-D-muramoyl-L-alanine + 1.0 ATP --> 1.0 phosphate + 1.0 ADP + 1.0 UDP-N-acetyl-alpha-D-muramoyl-L-alanyl-D-glutamate + 1.0 H+ # source: MetaCyc, BRENDA, KEGG (queried 6.3.2.9)  
peptidoglycan-biosyn-I/5\_6.3.2.13\_UDP-NACMURALGLDAPLIG-RXN : 1.0 UDP-N-acetyl-alpha-D-muramoyl-L-alanyl-D-glutamate + 1.0 meso-diaminopimelate + 1.0 ATP --> 1.0 UDP-N-acetyl-alpha-D-muramoyl-L-alanyl-gamma-D-glutamyl-meso-2,6-diaminopimelate + 1.0 H+ + 1.0 phosphate + 1.0 ADP # source: MetaCyc, BRENDA, KEGG (queried 6.3.2.13)  
D-alanyl-D-alanine/1\_5.1.1.1\_ALARACECAT-RXN : 1.0 L-alanine <=> 1.0 D-alanine # source: MetaCyc, BRENDA, KEGG (queried 5.1.1.1)  
D-alanyl-D-alanine/2\_6.3.2.4\_DALADALALIG-RXN : 2.0 D-alanine + 1.0 ATP --> 1.0 phosphate + 1.0 D-alanyl-D-alanine + 1.0 ADP + 1.0 H+ # source: MetaCyc, BRENDA, KEGG (queried 6.3.2.4)  
peptidoglycan-biosyn-I/6\_6.3.2.10\_UDP-NACMURALGLDAPALIG-RXN : 1.0 UDP-N-acetyl-alpha-D-muramoyl-L-alanyl-gamma-D-glutamyl-meso-2,6-diaminopimelate + 1.0 D-alanyl-D-alanine + 1.0 ATP --> 1.0 H+ + 1.0 phosphate + 1.0 UDP-N-acetyl-alpha-D-muramoyl-L-alanyl-gamma-D-glutamyl-meso-2,6-diaminopimeloyl-D-alanyl-D-alanine + 1.0 ADP # source: MetaCyc, KEGG (queried 6.3.2.10)  
peptidoglycan-biosyn-I/p7\_3.6.1.27\_UNDECAPRENYL-DIPHOSPHATASE-RXN : 1.0 H2O + 1.0 di-trans,octa-cis-undecaprenyl\_diphosphate --> 1.0 H+ + 1.0 di-trans,octa-cis-undecaprenyl\_phosphate + 1.0 phosphate # source: MetaCyc, BRENDA, KEGG (queried 3.6.1.27)  
peptidoglycan-biosyn-I/7\_2.7.8.13\_PHOSNACMURPENTATRANS-RXN : 1.0 di-trans,octa-cis-undecaprenyl\_phosphate + 1.0 UDP-N-acetyl-alpha-D-muramoyl-L-alanyl-gamma-D-glutamyl-meso-2,6-diaminopimeloyl-D-alanyl-D-alanine --> 1.0 undecaprenyldiphospho-N-acetylmuramoyl-L-alanyl-gamma-D-glutamyl-meso-2,6-diaminopimeloyl-D-alanyl-D-alanine + 1.0 UMP # source: MetaCyc, KEGG (queried 2.7.8.13)  
peptidoglycan-biosyn-I/8\_2.4.1.227\_NACGLCTRANS-RXN : 1.0 undecaprenyldiphospho-N-acetylmuramoyl-L-alanyl-gamma-D-glutamyl-meso-2,6-diaminopimeloyl-D-alanyl-D-alanine + 1.0 UDP-N-acetyl-alpha-D-glucosamine <=> 1.0 ditrans,octacis-undecaprenyldiphospho-N-acetyl-(N-acetylglucosaminy)lmuramoyl-L-alanyl-gamma-D-glutamyl-meso-2,6-diaminopimeloyl-D-alanyl-D-alanine + 1.0 H+ + 1.0 UDP # source: MetaCyc, KEGG (queried 2.4.1.227)  
#Based on HPLC-MS-studies (Peltier et al., 2011)  
#Gly: -0.0453  
#meso-DAP: +0.0035  
#D-Ala: 2-0.6109 = +1.3891  
#Cross: 0.3107

```

#deAc: 0.9278
#H2O: -deAc -meso-DAP -D-Ala + Cross - Gly = -1.9644
peptidoglycan-biosyn-I/10_manual_3.4.16.4_3.5.1.104_HD-murein-mods : 1.0 ditrans,octacis-undecaprenyldiphospho-N-acetyl-(N-acetylglucosaminyl)muramoyl-L-alanyl-
gamma-D-glutamyl-meso-2,6-diaminopimeloyl-D-alanyl-D-alanine + 1.9644 H2O + 0.0453 glycine + 1.3891 D-alanine --> 0.9278 acetate + 0.0035 meso-diaminopimelate + 1.0 di-trans,octa-
cis-undecaprenyl_diphosphate + 1.0 H+ + 1.0 a_peptidoglycan
#####
#peptidoglycan degradation
#H2O: 2 - Anh - acetate + 1 + glycine = 2.114
#1x ABC transport (appABCF)
peptidoglycan-degr/1_manual_3.5.1.28_3.2.1.96_3.5.1.104_HD-appABCF : 1.0 a_peptidoglycan + 0.9278 acetate + 3.114 H2O + 1.0 ATP --> 0.0035 1,6-anhydro-N-acetyl-
beta-muramate + 0.9965 N-acetylmuramate + 1.0 N-acetyl-beta-D-glucosamine + 0.6109 L-alanyl-gamma-D-glutamyl-meso-2,6-diaminopimeloyl-D-alanine + 0.3856 L-alanyl-gamma-D-glutamyl-
meso-diaminopimelate + 0.0035 L-alanyl-D-glutamate + 0.0453 glycine + 1.0 ADP + 1.0 H+ + 1.0 phosphate
peptidoglycan-degr/2a_2.7.1.170_RXN0-4621 : 1.0 1,6-anhydro-N-acetyl-beta-muramate + 1.0 ATP + 1.0 H2O --> 1.0 H+ + 1.0 N-acetyl-beta-
muramate_6-phosphate + 1.0 ADP # source: MetaCyc, BRENDA, KEGG (queried 2.7.1.170)
#Additional reaction of EC 2.7.1.59 shown for C. acetobutylicum (Reith et al., 2011)
peptidoglycan-degr/2b_manual_2.7.1.59_HD-2.7.1.59 : 1.0 N-acetylmuramate + 1.0 ATP --> 1.0 ADP + 1.0 H+ + 1.0 N-acetyl-beta-muramate_6-phosphate
peptidoglycan-degr/3_4.2.1.126_RXN0-4641 : 1.0 H2O + 1.0 N-acetyl-beta-muramate_6-phosphate <=> 1.0 N-acetyl-D-glucosamine_6-phosphate +
1.0 (R)-lactate # source: MetaCyc (queried 4.2.1.126)
peptidoglycan-degr/4_2.7.1.59_N-ACETYLGUCOSAMINE-KINASE-RXN : 1.0 N-acetyl-beta-D-glucosamine + 1.0 ATP --> 1.0 ADP + 1.0 H+ + 1.0 N-acetyl-D-glucosamine_6-
phosphate # source: MetaCyc, BRENDA, KEGG (queried 2.7.1.59)

#N-acetylglucosamine degradation I
N-acetylglucosamine-degr-I/1_3.5.1.25_NAG6PDEACET-RXN : 1.0 H2O + 1.0 N-acetyl-D-glucosamine_6-phosphate --> 1.0 acetate + 1.0 D-glucosamine_6-
phosphate # source: MetaCyc, BRENDA, KEGG (queried 3.5.1.25)
N-acetylglucosamine-degr-I/2_3.5.99.6_BS363214 : 1.0 H2O + 1.0 D-glucosamine_6-phosphate --> 1.0 ammonia + 1.0 beta-D-fructofuranose_6-
phosphate # source: BRENDA, KEGG (queried 3.5.99.6)

#muropeptide degradation
muropeptide-degr/1_3.4.17.13_RXN0-5227 : 1.0 H2O + 1.0 L-alanyl-gamma-D-glutamyl-meso-2,6-diaminopimeloyl-D-alanine --> 1.0 L-alanyl-
gamma-D-glutamyl-meso-diaminopimelate + 1.0 D-alanine # source: MetaCyc (queried 3.4.17.13)
muropeptide-degr/2_RXN0-961 : 1.0 L-alanyl-gamma-D-glutamyl-meso-diaminopimelate + 1.0 H2O --> 1.0 L-alanyl-D-glutamate
muropeptide-degr/3_5.1.1.20_RXN0-5228 : 1.0 L-alanyl-D-glutamate <=> 1.0 L-alanyl-L-glutamate # source: MetaCyc, BRENDA, KEGG
(queried 5.1.1.20)
muropeptide-degr/4_3.4.13.18_RXN0-6981 : 1.0 H2O + 1.0 L-alanyl-L-glutamate --> 1.0 L-glutamate + 1.0 L-alanine # source: MetaCyc,
BRENDA (queried 3.4.13.18) // other EC numbers for this reaction: 3.4.11.14
#####
#L-CWG biosynthesis
L-CWG-biosyn/1a_3.1.3.4_PHOSPHATIDATE-PHOSPHATASE-RXN : 1.0 1,2-diacyl-sn-glycerol_3-phosphate + 1.0 H2O --> 1.0 1,2-diacyl-sn-glycerol + 1.0 phosphate
# source: MetaCyc, BRENDA, KEGG (queried 3.1.3.4) // other EC numbers for this reaction: 3.1.3.81
L-CWG-biosyn/1b_2.7.1.107_DIACYLGLYKIN-RXN : 1.0 ATP + 1.0 1,2-diacyl-sn-glycerol --> 1.0 H+ + 1.0 ADP + 1.0 1,2-diacyl-sn-glycerol_3-
phosphate # source: MetaCyc, BRENDA, KEGG (queried 2.7.1.107)
L-CWG-biosyn/2_2.4.1.315_2.4.1.337_2.4.1.157-RXN : 1.0 1,2-diacyl-sn-glycerol + 1.0 UDP-alpha-D-glucose --> 1.0 3-D-Glucosyl-1,2-diacylglycerol +
1.0 H+ + 1.0 UDP # source: MetaCyc, BRENDA, KEGG (queried 2.4.1.315, 2.4.1.337) // other EC numbers for this reaction: 2.4.1.336, 2.4.1.157, 2.4.1.cp
L-CWG-biosyn/3_2.4.1.315_RXN-15117 : 1.0 3-D-Glucosyl-1,2-diacylglycerol + 1.0 UDP-alpha-D-glucose <=> 1.0 |diacyl-3-0-glucl-1-6-gluc-
sn-glycerol| + 1.0 UDP + 1.0 H+ # source: MetaCyc (queried 2.4.1.315)
L-CWG-biosyn/4_2.4.1.315_RXN-15118 : 1.0 |diacyl-3-0-glucl-1-6-gluc-sn-glycerol| + 1.0 UDP-alpha-D-glucose <=> 1.0 H+ + 1.0 |diacyl-3-
Glc-16-Glc-16-Glc-glycerol| + 1.0 UDP # source: MetaCyc (queried 2.4.1.315)
#####
#Flagellin modification (Faulds-Pain et al. 2014)
flagellin-modification/1_manual_2.4.-_HD-fla1 : 1.0 UDP-N-acetyl-alpha-D-glucosamine --> 1.0 UDP + 1.0 H+ + 1.0 GluNAc-FliC
flagellin-modification/p1_manual_3.1.3.-_HD-fla2 : 1.0 L-threonine + 1.0 phosphate <=> 1.0 H2O + 1.0 3-phospho-L-threonine
flagellin-modification/2_manual_3.1.4.-_HD-fla3 : 1.0 GluNAc-FliC + 1.0 3-phospho-L-threonine + 1.0 H+ --> 1.0 H2O + 1.0 Thr-P-GluNAc-FliC
flagellin-modification/3_manual_2.1.1.-_HD-fla4 : 1.0 Thr-P-GluNAc-FliC + 1.0 S-adenosyl-L-methionine --> 1.0 Me-Thr-P-GluNAc-FliC + 2.0 H+ + 1.0
S-adenosyl-L-homocysteine
#####
#glycogen biosynthesis I + degradation
glycogen-biosyn-I/1_2.7.7.27_GLUC1PADENYLTRANS-RXN : 1.0 H+ + 1.0 alpha-D-glucopyranose_1-phosphate + 1.0 ATP --> 1.0 diphosphate + 1.0 ADP-alpha-D-
glucose # source: MetaCyc, BRENDA, KEGG (queried 2.7.7.27)
glycogen-biosyn-I/2_manual_2.4.1.21_HD-2.4.1.21 : 1.0 ADP-alpha-D-glucose --> 1.0 ADP + 1.0 [1-4-alpha-D-Glucan] + 1.0 H+
glycogen-biosyn-I/3_2.4.1.18_3.2.1.54_3.2.1.41_3.2.1.1_GLYCOGEN-BRANCH-RXN : 1.0 [1-4-alpha-D-Glucan] --> 1.0 [Glycogens] # source: MetaCyc, BRENDA (queried 2.4.1.18,
3.2.1.54, 3.2.1.41, 3.2.1.1) // other EC numbers for this reaction: 2.4.1.25, 3.2.1.68, 3.2.1.116
glycogen-degr_manual_3.2.1.54_3.2.1.41_3.2.1.1_HD-Glycogen : 3.0 [Glycogens] + 1.0 H2O --> 1.0 [Maltodextrins] # source: MetaCyc, BRENDA (queried 2.4.1.18,

```

```

3.2.1.54, 3.2.1.41, 3.2.1.1) // other EC numbers for this reaction: 2.4.1.25, 3.2.1.68, 3.2.1.116
glycogen-degr_3.2.1.133_3.2.1.1_RXN-12188 : 1.0 [Maltodextrins] + 1.0 H2O --> 1.0 D-glucose + 1.0 alpha,alpha-trehalose # source: MetaCyc,
BRENDA (queried 3.2.1.133, 3.2.1.1) // there are 4 more EC numbers for this reaction
glycogen-degr_2.4.1.64_2.4.1.8_ALPHAALPHA-TREHALOSE-PHOSPHORYLASE-RXN : 1.0 phosphate + 1.0 alpha,alpha-trehalose <=> 1.0 beta-D-glucose_1-phosphate + 1.0 D-glucose #
source: MetaCyc, BRENDA, KEGG (queried 2.4.1.64, 2.4.1.8)
glycogen-degr_3.2.1.10_RXN-15910 : 1.0 alpha,alpha-trehalose + 1.0 H2O --> 2.0 D-glucose # source: MetaCyc, BRENDA (queried
3.2.1.10) // other EC numbers for this reaction: 3.2.1.20

glucose-degr/1_2.7.1.2_GLUCOKIN-RXN : 1.0 D-glucose + 1.0 ATP --> 1.0 D-glucose_6-phosphate + 1.0 H+ + 1.0 ADP # source: MetaCyc,
BRENDA, KEGG (queried 2.7.1.2) // other EC numbers for this reaction: 2.7.1.1
glucose-degr/2_5.4.2.6_BETA-PHOSPHOGLUCOMUTASE-RXN : 1.0 beta-D-glucose_1-phosphate <=> 1.0 beta-D-glucose_6-phosphate # source: MetaCyc, BRENDA,
KEGG (queried 5.4.2.6)
glucose-degr/3_5.3.1.9_R03321 : 1.0 beta-D-glucose_6-phosphate <=> 1.0 beta-D-fructofuranose_6-phosphate # source: KEGG (queried
5.3.1.9)
#####
#polymer biosynthesis
exopolysaccharide-biosynthesis/1_manual_2.4.1.12_HD-2.4.1.12 : 1.0 UDP-alpha-D-glucose --> 1.0 UDP + 1.0 cellulose + 1.0 H+
#1 ATP per glucose subunit
exopolysaccharide-biosynthesis/2_transport : 1.0 cellulose + 1.0 ATP + 1.0 H2O --> 1.0 cellulose[ex] + 1.0 ADP + 1.0 phosphate + 1.0 H+
#CDIF630erm_02795; 50 % acetylation
exopolysaccharide-biosynthesis/3_manual_2.3.1.-_HD-PSac : 1.0 cellulose[ex] + 0.5 acetyl-CoA <=> 0.5 coenzyme_A + 1.0 acetyl-cellulose[ex]
#trimming; chain-length: 100
exopolysaccharide-biosynthesis/4_manual_3.2.1.4_HD-3.2.1.4 : 1.0 acetyl-cellulose[ex] + 0.01 H2O --> 1.0 exopolysaccharide[ex]

exopolysaccharide_exchange : exopolysaccharide[ex] -->
#####
#glutamate/mine
glutamate_6.3.1.2_GLUTAMINESYN-RXN : 1.0 ammonium + 1.0 L-glutamate + 1.0 ATP --> 1.0 L-glutamine + 1.0 ADP + 1.0 H+ + 1.0 phosphate
# source: MetaCyc, BRENDA, KEGG (queried 6.3.1.2)
glutamate_3.5.1.2_6.3.5.2_6.3.5.5_6.3.5.4_GLUTAMIN-RXN : 1.0 H2O + 1.0 L-glutamine --> 1.0 ammonium + 1.0 L-glutamate # source: MetaCyc, BRENDA, KEGG
(queried 3.5.1.2, 6.3.5.2, 6.3.5.5, 6.3.5.4) // there are 6 more EC numbers for this reaction
glutamate_1.4.1.2_GLUTAMATE-DEHYDROGENASE-NADP+-RXN_WOP : 1.0 NAD+ + 1.0 H2O + 1.0 L-glutamate <=> 1.0 H+ + 1.0 NADH + 1.0 2-oxoglutarate + 1.0 ammonium #
source: MetaCyc, BRENDA, KEGG (queried 1.4.1.2) // other EC numbers for this reaction: 1.4.1.3
#####
#asp biosyn,asn biosyn I+II,asn degr. I
aspartate_2.6.1.1_ASPAMINOTRANS-RXN : 1.0 2-oxoglutarate + 1.0 L-aspartate <=> 1.0 L-glutamate + 1.0 oxaloacetate # source: MetaCyc,
BRENDA, KEGG (queried 2.6.1.1) // other EC numbers for this reaction: 2.6.1.39
aspartate_6.3.5.4_ASNSYNB-RXN : 1.0 L-glutamine + 1.0 ATP + 1.0 H2O + 1.0 L-aspartate --> 1.0 L-asparagine + 1.0 AMP + 1.0 H+ +
1.0 diphosphate + 1.0 L-glutamate # source: MetaCyc, BRENDA, KEGG (queried 6.3.5.4)
aspartate_6.3.1.1_6.3.5.4_ASNSYNA-RXN : 1.0 ATP + 1.0 ammonium + 1.0 L-aspartate --> 1.0 L-asparagine + 1.0 AMP + 1.0 H+ + 1.0
diphosphate # source: MetaCyc, BRENDA, KEGG (queried 6.3.1.1, 6.3.5.4)
aspartate_3.5.5.4_3.5.1.1_ASPARAGHYD-RXN : 1.0 H2O + 1.0 L-asparagine --> 1.0 ammonium + 1.0 L-aspartate # source: MetaCyc, BRENDA, KEGG
(queried 3.5.5.4, 3.5.1.1) // other EC numbers for this reaction: 3.5.1.38
#####
#lys biosyn II
lysine-biosyn-II/1_2.7.2.4_ASPARTATEKIN-RXN : 1.0 ATP + 1.0 L-aspartate --> 1.0 ADP + 1.0 L-aspartyl-4-phosphate # source: MetaCyc, BRENDA,
KEGG (queried 2.7.2.4)
lysine-biosyn-II/2_1.2.1.11_ASPARTATE-SEMIALDEHYDE-DEHYDROGENASE-RXN : 1.0 NADP+ + 1.0 L-aspartate-semialdehyde + 1.0 phosphate <=> 1.0 L-aspartyl-4-phosphate + 1.0 H+
+ 1.0 NADPH # source: MetaCyc, BRENDA, KEGG (queried 1.2.1.11)
lysine-biosyn-II/3_4.3.3.7_DIHYDRODIPICSYN-RXN : 1.0 pyruvate + 1.0 L-aspartate-semialdehyde --> 1.0 (2S,4S)-4-hydroxy-2,3,4,5-
tetrahydrodipicolinate + 1.0 H+ + 1.0 H2O # source: MetaCyc, BRENDA, KEGG (queried 4.3.3.7)
lysine-biosyn-II/4_1.17.1.8_RXN-14014 : 1.0 (S)-2,3,4,5-tetrahydrodipicolinate + 1.0 H2O + 1.0 NADP+ <-- 1.0 H+ + 1.0 NADPH + 1.0
(2S,4S)-4-hydroxy-2,3,4,5-tetrahydrodipicolinate # source: MetaCyc, BRENDA, KEGG (queried 1.17.1.8)
lysine-biosyn-II/5_2.3.1.89_2.3.1.89-RXN : 1.0 H2O + 1.0 (S)-2,3,4,5-tetrahydrodipicolinate + 1.0 acetyl-CoA --> 1.0 coenzyme_A + 1.0 L-2-
acetamido-6-oxoheptanedioate # source: MetaCyc, BRENDA, KEGG (queried 2.3.1.89) // other EC numbers for this reaction: 2.3.1
lysine-biosyn-II/6_2.6.1.-_RXN-4822 : 1.0 L-2-acetamido-6-oxoheptanedioate + 1.0 L-glutamate --> 1.0 2-oxoglutarate + 1.0 N-acetyl-L,L-
2,6-diaminopimelate # source: MetaCyc, KEGG (queried 2.6.1.-) // other EC numbers for this reaction: 2.6.1
lysine-biosyn-II/7_3.5.1.47_N-ACETYLDIAMINOPIMELATE-DEACETYLASE-RXN : 1.0 N-acetyl-L,L-2,6-diaminopimelate + 1.0 H2O --> 1.0 acetate + 1.0 L,L-diaminopimelate #
source: MetaCyc, BRENDA, KEGG (queried 3.5.1.47)
lysine-biosyn-II/8_5.1.1.7_DIAMINOPIMEPIM-RXN : 1.0 L,L-diaminopimelate <=> 1.0 meso-diaminopimelate # source: MetaCyc, BRENDA, KEGG (queried
5.1.1.7)
lysine-biosyn-II/9_4.1.1.20_DIAMINOPIMDECARB-RXN : 1.0 H+ + 1.0 meso-diaminopimelate --> 1.0 CO2 + 1.0 L-lysine # source: MetaCyc, BRENDA, KEGG
(queried 4.1.1.20)
#####

```

```

#arginine biosyn II
arginine-biosyn-II/1_2.3.1.1_N-ACETYLTRANSFER-RXN : 1.0 L-glutamate + 1.0 acetyl-CoA <=> 1.0 N-acetyl-L-glutamate + 1.0 coenzyme_A + 1.0 H+ #
source: MetaCyc, BRENDA, KEGG (queried 2.3.1.1)
arginine-biosyn-II/2_2.7.2.8_ACETYLGPUTKIN-RXN : 1.0 ATP + 1.0 N-acetyl-L-glutamate --> 1.0 N-acetylglutamyl-phosphate + 1.0 ADP # source:
MetaCyc, BRENDA, KEGG (queried 2.7.2.8)
arginine-biosyn-II/3_1.2.1.38_N-ACETYLGPUTREDUCT-RXN : 1.0 phosphate + 1.0 NADP+ + 1.0 N-acetyl-L-glutamate_5-semialdehyde <=> 1.0 N-acetylglutamyl-
phosphate + 1.0 H+ + 1.0 NADPH # source: MetaCyc, BRENDA, KEGG (queried 1.2.1.38)
arginine-biosyn-II/4_2.6.1.11_ACETYLORNTRANSAM-RXN : 1.0 N-acetyl-L-ornithine + 1.0 2-oxoglutarate <=> 1.0 N-acetyl-L-glutamate_5-semialdehyde + 1.0
L-glutamate # source: MetaCyc, BRENDA, KEGG (queried 2.6.1.11)
arginine-biosyn-II/5_2.3.1.35_GLUTAMATE-N-ACETYLTRANSFERASE-RXN : 1.0 N-acetyl-L-ornithine + 1.0 L-glutamate --> 1.0 N-acetyl-L-glutamate + 1.0 L-ornithine #
source: MetaCyc, BRENDA, KEGG (queried 2.3.1.35)
arginine-biosyn-II/p6_6.3.5.5_CARBPSYN-RXN : 2.0 ATP + 1.0 H2O + 1.0 L-glutamine + 1.0 hydrogen_carbonate --> 2.0 ADP + 1.0 phosphate + 1.0 L-
glutamate + 1.0 carbamoyl_phosphate + 2.0 H+ # source: MetaCyc, BRENDA, KEGG (queried 6.3.5.5)
arginine-biosyn-II/6_2.1.3.3_ORNCARBAMTRANSFER-RXN : 1.0 carbamoyl_phosphate + 1.0 L-ornithine <=> 1.0 phosphate + 1.0 L-citrulline + 1.0 H+ #
source: MetaCyc, BRENDA, KEGG (queried 2.1.3.3) // other EC numbers for this reaction: 3.5.3.12
arginine-biosyn-II/7_6.3.4.5_ARGSUCCINSYN-RXN : 1.0 L-citrulline + 1.0 L-aspartate + 1.0 ATP --> 1.0 diphosphate + 1.0 L-arginino-succinate + 1.0
AMP + 1.0 H+ # source: MetaCyc, BRENDA, KEGG (queried 6.3.4.5)
arginine-biosyn-II/8_4.3.2.1_ARGSUCCINLYA-RXN : 1.0 L-arginino-succinate <=> 1.0 fumarate + 1.0 L-arginine # source: MetaCyc, BRENDA, KEGG
(queried 4.3.2.1)
#####
#arginine degr
arginine-degradation/1_3.5.3.6_ARGININE-DEIMINASE-RXN : 1.0 L-arginine + 1.0 H2O --> 1.0 ammonium + 1.0 L-citrulline # source: MetaCyc, BRENDA, KEGG
(queried 3.5.3.6) // other EC numbers for this reaction: 3.5.3.15
#3.5.1.87 assumed to use citrulline as substrate
arginine-degradation/2_3.5.1.87_CITRULLINASE-RXN : 2.0 H+ + 1.0 L-citrulline + 1.0 H2O --> 1.0 CO2 + 1.0 ammonium + 1.0 L-ornithine
#####
#putrescine/spermidine biosyn

putrescine-biosyn-I/1_4.1.1.19_ARGDECARBOX-RXN : 1.0 H+ + 1.0 L-arginine --> 1.0 CO2 + 1.0 agmatine # source: MetaCyc, BRENDA, KEGG (queried
4.1.1.19)
putrescine-biosyn-I/2_3.5.3.11_AGMATIN-RXN : 1.0 H2O + 1.0 agmatine --> 1.0 putrescine + 1.0 urea # source: MetaCyc, BRENDA, KEGG (queried
3.5.3.11)
spermidine-biosyn-I/1_4.1.1.50_SAMDECARB-RXN : 1.0 S-adenosyl-L-methionine + 1.0 H+ --> 1.0 S-adenosyl_3-(methylthio)propylamine + 1.0 CO2 #
source: MetaCyc, BRENDA, KEGG (queried 4.1.1.50)
spermidine-biosyn-I/2_2.5.1.16_SPERMIDINESYN-RXN : 1.0 putrescine + 1.0 S-adenosyl_3-(methylthio)propylamine <=> 1.0 H+ + 1.0 S-methyl-5'-
thioadenosine + 1.0 spermidine # source: MetaCyc, BRENDA, KEGG (queried 2.5.1.16)

#possible side reaction
spermine-biosynthesis_2.5.1.16_SPERMINE-SYNTHASE-RXN : 1.0 spermidine + 1.0 S-adenosyl_3-(methylthio)propylamine --> 1.0 H+ + 1.0 S-methyl-5'-
thioadenosine + 1.0 spermine # source: MetaCyc, BRENDA, KEGG (queried 2.5.1.16) // other EC numbers for this reaction: 2.5.1.22

N-acetylputrescine-biosyn_2.3.1.57_RXN-0 : 1.0 putrescine + 1.0 acetyl-CoA --> 1.0 coenzyme_A + 1.0 N-acetylputrescine + 1.0 H+ # source:
MetaCyc, BRENDA, KEGG (queried 2.3.1.57)
N-acetylspermidine-biosyn_2.3.1.57_SPERMACTRAN-RXN : 1.0 acetyl-CoA + 1.0 spermidine --> 1.0 coenzyme_A + 1.0 N1-acetylspermidine + 1.0 H+ # source:
MetaCyc, BRENDA (queried 2.3.1.57)
N-acetylspermine-biosyn_2.3.1.57_RXN-9939 : 1.0 spermine + 1.0 acetyl-CoA --> 1.0 coenzyme_A + 1.0 N1-acetylspermine + 1.0 H+ # source:
MetaCyc (queried 2.3.1.57)
N-diacetylspermine-biosyn_2.3.1.57_BS321087 : 1.0 acetyl-CoA + 1.0 N1-acetylspermine --> 1.0 N1,N12-diacetylspermine + 1.0 coenzyme_A #
source: BRENDA (queried 2.3.1.57)
#####
#S-methyl-5'-thioadenosine degradation
S-methyl-5'-thioadenosine-degr_3.2.2.16_3.2.2.9_METHYLTHIOADENOSINE-NUCLEOSIDASE-RXN : 1.0 H2O + 1.0 S-methyl-5'-thioadenosine --> 1.0 adenine + 1.0 S-methyl-5-thio-D-
ribose # source: MetaCyc, BRENDA, KEGG (queried 3.2.2.16, 3.2.2.9)
S-methyl-5'-thioadenosine-degr_3.2.2.9_5-METHYLTHIOADENOSINE-PHOSPHORYLASE-RXN : 1.0 S-methyl-5'-thioadenosine + 1.0 phosphate --> 1.0 adenine + 1.0 S-methyl-5-thio-
alpha-D-ribose_1-phosphate # source: MetaCyc, BRENDA, KEGG (queried 3.2.2.9) // other EC numbers for this reaction: 2.4.2.28
#####
#S-adenosyl-L-methionine cycle I

S-adenosyl-L-methionine-cycle-I/1_3.2.2.9_ADENOSYLHOMOCYSTEINE-NUCLEOSIDASE-RXN : 1.0 S-adenosyl-L-homocysteine + 1.0 H2O --> 1.0 adenine + 1.0 S-ribosyl-L-
homocysteine # source: MetaCyc, BRENDA, KEGG (queried 3.2.2.9)
S-adenosyl-L-methionine-cycle-I/2_4.4.1.21_RIBOSYLHOMOCYSTEINASE-RXN : 1.0 S-ribosyl-L-homocysteine --> 1.0 autoinducer_2 + 1.0 L-homocysteine # source:
MetaCyc, BRENDA, KEGG (queried 4.4.1.21)
S-adenosyl-L-methionine-cycle-I/3_2.1.1.13_HOMOCYSMETB12-RXN : 1.0 N5-methyl-tetrahydrofolate + 1.0 L-homocysteine --> 1.0 tetrahydropteroyl_tri-
L-glutamate + 1.0 L-methionine # source: MetaCyc (queried 2.1.1.13)

```

S-adenosyl-L-methionine-cycle-I/4\_2.5.1.6\_S-ADENMETSYN-RXN : 1.0 L-methionine + 1.0 ATP + 1.0 H2O --> 1.0 diphosphate + 1.0 S-adenosyl-L-methionine + 1.0 phosphate # source: MetaCyc, BRENDA, KEGG (queried 2.5.1.6)  
#GAP: 2.1.1.; mostly DNA or t/rRNA  
#auto-inducer  
autoinducer-AI-2-biosyn/1\_spontaneous\_RXN-10015 : 1.0 autoinducer\_2 --> 1.0 (2R,4S)-2-methyl-2,4-dihydroxydihydrofuran-3-one # source: MetaCyc  
autoinducer-AI-2-biosyn/2\_spontaneous\_RXN-10017 : 1.0 H2O + 1.0 (2R,4S)-2-methyl-2,4-dihydroxydihydrofuran-3-one --> 1.0 (2R,4S)-2-methyl-2,3,3,4-tetrahydroxytetrahydrofuran # source: MetaCyc  
#####  
#met biosyn C  
methionine-biosyn/1\_2.3.1.46\_HOMSUCTRAN-RXN : 1.0 succinyl-CoA + 1.0 L-homoserine --> 1.0 coenzyme\_A + 1.0 O-succinyl-L-homoserine # source: MetaCyc, BRENDA, KEGG (queried 2.3.1.46)  
methionine-biosyn/2\_2.5.1.49\_RXN-9384 : 1.0 O-succinyl-L-homoserine + 1.0 hydrogen\_sulfide <=> 1.0 L-homocysteine + 1.0 H+ + 1.0 succinate # source: MetaCyc, BRENDA, KEGG (queried 2.5.1.49) // other EC numbers for this reaction: 2.5.1.48, 2.5.1  
#####  
#met degr II  
methionine-degr-II\_4.4.1.11\_RXN-14301 : 1.0 L-methionine --> 1.0 H+ + 1.0 (2Z)-2-aminobut-2-enoate + 1.0 methanethiol # source: MetaCyc, KEGG (queried 4.4.1.11)  
#####  
#2-amino-2-enoate degradation  
2-aminobut-2-enoate-degr/1\_spontaneous\_4.4.1.1\_4.3.1.19\_3.5.99.7\_4.4.1.2\_RXN-15121 : 1.0 (2Z)-2-aminobut-2-enoate --> 1.0 2-iminobutanoate # source: MetaCyc, BRENDA, KEGG (queried 4.4.1.1, 4.3.1.19, 3.5.99.7, 4.4.1.2)  
2-aminobut-2-enoate-degr/2\_spontaneous\_3.5.99.7\_3.5.99.10\_4.4.1.1\_4.3.1.19\_4.4.1.2\_3.5.99.-\_RXN-15123 : 1.0 H2O + 1.0 H+ + 1.0 2-iminobutanoate --> 1.0 2-oxobutanoate + 1.0 ammonium # source: MetaCyc, BRENDA, KEGG (queried 3.5.99.7, 3.5.99.10, 4.4.1.1, 4.3.1.19, 4.4.1.2, 3.5.99.-) // other EC numbers for this reaction: 3.5.99  
2-aminoprop-2-enoate-degr/1\_spontaneous\_4.4.1.8\_4.4.1.13\_4.4.1.25\_4.3.1.17\_4.4.1.28\_RXN-15124 : 1.0 2-aminoprop-2-enoate --> 1.0 2-iminopropanoate # source: MetaCyc, BRENDA, KEGG (queried 4.4.1.8, 4.4.1.13, 4.4.1.25, 4.3.1.17, 4.4.1.28)  
2-aminoprop-2-enoate-degr/2\_spontaneous\_4.4.1.8\_4.4.1.13\_4.3.1.17\_4.4.1.28\_3.5.99.10\_4.4.1.25\_RXN-15127 : 1.0 H2O + 1.0 2-iminopropanoate + 1.0 H+ --> 1.0 ammonium + 1.0 pyruvate # source: MetaCyc, BRENDA, KEGG (queried 4.4.1.8, 4.4.1.13, 4.3.1.17, 4.4.1.28, 3.5.99.10, 4.4.1.25)  
#####  
#2-aminobutanoate  
2-aminobutanoate\_2.6.1.42\_BS356546 : 1.0 (S)-2-aminobutanoate + 1.0 2-oxoglutarate <-- 1.0 2-oxobutanoate + 1.0 L-glutamate # source: BRENDA, KEGG (queried 2.6.1.42)  
#####  
#threonine biosyn  
threonine-from-homoserine/0\_1.1.1.3\_HOMOSERDEHYDROG-RXN : 1.0 NADP+ + 1.0 L-homoserine <-- 1.0 H+ + 1.0 L-aspartate-semialdehyde + 1.0 NADPH # source: MetaCyc, BRENDA, KEGG (queried 1.1.1.3)  
threonine-from-homoserine/1\_2.7.1.39\_HOMOSERKIN-RXN : 1.0 L-homoserine + 1.0 ATP --> 1.0 H+ + 1.0 ADP + 1.0 O-phospho-L-homoserine # source: MetaCyc, BRENDA, KEGG (queried 2.7.1.39)  
threonine-from-homoserine/2\_4.2.3.1\_THRESYN-RXN : 1.0 H2O + 1.0 O-phospho-L-homoserine --> 1.0 phosphate + 1.0 L-threonine # source: MetaCyc, BRENDA, KEGG (queried 4.2.3.1)  
#####  
#threonine degr  
threonine-degr-IV\_4.1.2.5\_THREONINE-ALDOLASE-RXN : 1.0 L-threonine --> 1.0 glycine + 1.0 acetaldehyde # source: MetaCyc, BRENDA, KEGG (queried 4.1.2.5) // other EC numbers for this reaction: 4.1.2.48  
threonine-degr-V\_4.3.1.19\_RXN-15122 : 1.0 L-threonine --> 1.0 (2Z)-2-aminobut-2-enoate + 1.0 H+ + 1.0 H2O # source: MetaCyc, BRENDA (queried 4.3.1.19)  
threonine-degr-II/1\_1.1.1.103\_THREODEHYD-RXN : 1.0 L-threonine + 1.0 NAD+ --> 1.0 L-2-amino-3-oxobutanoate + 1.0 NADH + 1.0 H+ # source: MetaCyc, BRENDA, KEGG (queried 1.1.1.103)  
threonine-degr-II/2\_spontaneous\_THREOSPON-RXN : 1.0 L-2-amino-3-oxobutanoate + 1.0 H+ --> 1.0 aminoacetone + 1.0 CO2  
#####  
#homoserine degr  
#C. sporogenes (Kreis and Hession, 1973) enzyme homolog  
homoserine-degr\_4.4.1.1\_4.3.1.19\_4.4.1.11\_HOMOSERDEAM-RXN : 1.0 L-homoserine --> 1.0 2-oxobutanoate + 1.0 ammonium # source: MetaCyc, BRENDA (queried 4.4.1.1, 4.3.1.19, 4.4.1.11)  
#####  
#serine biosyn  
serine-biosyn\_2.1.2.1\_GLYOHMETRANS-RXN : 1.0 tetrahydropteroyl\_tri-L-glutamate + 1.0 L-serine <=> 1.0 glycine + 1.0 H2O + 1.0 5,10-methylene-tetrahydrofolate # source: MetaCyc (queried 2.1.2.1)  
#####  
#serine degr  
serine-degr-A\_4.3.1.17\_RXN-15125 : 1.0 L-serine --> 1.0 H2O + 1.0 2-aminoprop-2-enoate + 1.0 H+ # source: MetaCyc, BRENDA, KEGG

(queried 4.3.1.17)

```
serine-degr-B/1a_2.6.1.51_SERINE--PYRUVATE-AMINOTRANSFERASE-RXN      : 1.0 L-serine + 1.0 pyruvate <=> 1.0 hydroxypyruvate + 1.0 L-alanine # source: MetaCyc,
BRENDA, KEGG (queried 2.6.1.51)
serine-degr-B/1b_2.6.1.2_RXN-974                                     : 1.0 L-serine + 1.0 2-oxoglutarate <=> 1.0 L-glutamate + 1.0 hydroxypyruvate # source:
MetaCyc, BRENDA (queried 2.6.1.2)
serine-degr-B/2a_1.1.1.81_1.1.1.60_GLYCERATE-DEHYDROGENASE-RXN     : 1.0 NAD+ + 1.0 D-glycerate <-- 1.0 NADH + 1.0 hydroxypyruvate + 1.0 H+ # source: MetaCyc,
BRENDA, KEGG (queried 1.1.1.81, 1.1.1.60) // other EC numbers for this reaction: 1.1.1.29, 1.1.1.26, 1.1.1.79
serine-degr-B/2b_1.1.1.81_RXN0-300                                  : 1.0 D-glycerate + 1.0 NADP+ <-- 1.0 hydroxypyruvate + 1.0 NADPH + 1.0 H+ # source: MetaCyc,
BRENDA, KEGG (queried 1.1.1.81) // other EC numbers for this reaction: 1.1.1, 1.1.1.215, 1.1.1.79
serine-degr-B/3_2.7.1.31_GLY3KIN-RXN                               : 1.0 ATP + 1.0 D-glycerate --> 1.0 ADP + 1.0 3-phospho-D-glycerate + 1.0 H+ # source:
MetaCyc, BRENDA, KEGG (queried 2.7.1.31)
#####
#sec biosyn I
selenocysteine-biosyn-I/1_2.7.9.3_2.7.9.3-RXN                     : 1.0 H2O + 1.0 selenide + 1.0 ATP --> 1.0 selenophosphate + 1.0 phosphate + 1.0 AMP # source:
MetaCyc, BRENDA, KEGG (queried 2.7.9.3)
selenocysteine-biosyn-I/2_2.9.1.1_2.9.1.1-RXN                     : 1.0 selenophosphate + 1.0 [L-seryl-SEC-tRNAs] --> 1.0 phosphate + 1.0 [Charged-SEC-tRNAs] #
source: MetaCyc (queried 2.9.1.1)

seleno-amino-acid-biosynthesis_2.5.1.47_RXN-12726                 : 1.0 O-acetyl-L-serine + 1.0 hydrogen_selenide --> 1.0 acetate + 1.0 L-selenocysteine + 1.0 H+
# source: MetaCyc, BRENDA, KEGG (queried 2.5.1.47)
#####
#sec degr C
#NADH as a guess
selenocysteine-degr_mod_4.4.1.16_mod_SELENOCYSTEINE-LYASE-RXN     : 1.0 NADPH + 1.0 L-selenocysteine --> 1.0 selenide + 1.0 NADP+ + 1.0 L-alanine + 1.0 H+ #
source: MetaCyc, BRENDA, KEGG (queried 4.4.1.16)
#####
#cys biosyn I
cysteine-biosyn-I/1_2.5.1.47_ACSELY-RXN                            : 1.0 hydrogen_sulfide + 1.0 O-acetyl-L-serine <=> 1.0 acetate + 1.0 L-cysteine + 1.0 H+ #
source: MetaCyc, BRENDA, KEGG (queried 2.5.1.47) // other EC numbers for this reaction: 2.5.1.65
cysteine-biosyn-I/2_2.3.1.30_SERINE-O-ACETTRAN-RXN                 : 1.0 L-serine + 1.0 acetyl-CoA --> 1.0 O-acetyl-L-serine + 1.0 coenzyme_A # source: MetaCyc,
BRENDA, KEGG (queried 2.3.1.30)
#####
#cys degr II
cysteine-degr-II_4.4.1.8_4.4.1.1_LCYSDSULF-RXN                    : 1.0 H2O + 1.0 L-cysteine --> 1.0 pyruvate + 1.0 hydrogen_sulfide + 1.0 ammonium # source:
MetaCyc, BRENDA, KEGG (queried 4.4.1.8, 4.4.1.1) // other EC numbers for this reaction: 4.4.1.28
#####
#sulfite degr
sulfite-degr_manual_1.8.1.-_HD-sulf                                : 1.0 sulfite + 3.0 NADH + 5.0 H+ <=> 3.0 H2O + 1.0 hydrogen_sulfide + 3.0 NAD+
#####
#histidine biosyn
histidine-biosyn/1_2.4.2.17_ATPPHOSPHORIBOSYLTRANS-RXN            : 1.0 diphosphate + 1.0 1-(5-phospho-beta-D-ribose)-ATP <=> 1.0 H+ + 1.0 ATP + 1.0 5-phospho-
alpha-D-ribose_1-diphosphate # source: MetaCyc, BRENDA, KEGG (queried 2.4.2.17)
histidine-biosyn/2_3.6.1.31_HISTPRATPHYD-RXN                       : 1.0 H2O + 1.0 1-(5-phospho-beta-D-ribose)-ATP --> 1.0 1-(5-phospho-beta-D-ribose)-AMP + 2.0
H+ + 1.0 diphosphate # source: MetaCyc, BRENDA, KEGG (queried 3.6.1.31)
histidine-biosyn/3_3.5.4.19_HISTCYCLOHYD-RXN                       : 1.0 1-(5-phospho-beta-D-ribose)-AMP + 1.0 H2O --> 1.0 1-(5-phospho-beta-D-ribose)-5-[(5-
phosphoribosylamino)methylideneamino]imidazole-4-carboxamide # source: MetaCyc, BRENDA, KEGG (queried 3.5.4.19)
histidine-biosyn/4_5.3.1.16_PRIBFAICARPISOM-RXN                    : 1.0 1-(5-phospho-beta-D-ribose)-5-[(5-phosphoribosylamino)methylideneamino]imidazole-4-
carboxamide --> 1.0 phosphoribulosylformimino-AICAR-P # source: MetaCyc, BRENDA, KEGG (queried 5.3.1.16)
histidine-biosyn/5_4.1.3.-_2.4.2.-_GLUTAMIDOTRANS-RXN              : 1.0 phosphoribulosylformimino-AICAR-P + 1.0 L-glutamine --> 1.0 D-erythro-imidazole-glycerol-
phosphate + 1.0 H+ + 1.0 5-amino-1-(5-phospho-D-ribose)imidazole-4-carboxamide + 1.0 L-glutamate # source: MetaCyc, BRENDA, KEGG (queried 4.1.3.-, 2.4.2.-) // other EC numbers
for this reaction: 2.4.2, 4.3.1.2, 4.1.3
histidine-biosyn/6_4.2.1.19_IMIDPHOSDEHYD-RXN                     : 1.0 D-erythro-imidazole-glycerol-phosphate --> 1.0 imidazole_acetol-phosphate + 1.0 H2O #
source: MetaCyc, BRENDA, KEGG (queried 4.2.1.19)
histidine-biosyn/7_2.6.1.9_HISTAMINOTRANS-RXN                      : 1.0 L-glutamate + 1.0 imidazole_acetol-phosphate --> 1.0 2-oxoglutarate + 1.0 L-histidinol-
phosphate # source: MetaCyc, BRENDA, KEGG (queried 2.6.1.9)
histidine-biosyn/8_3.1.3.15_HISTIDPHOS-RXN                         : 1.0 H2O + 1.0 L-histidinol-phosphate --> 1.0 histidinol + 1.0 phosphate # source: MetaCyc,
BRENDA, KEGG (queried 3.1.3.15)
histidine-biosyn/9_1.1.1.23_HISTOLDEHYD-RXN                       : 1.0 histidinol + 1.0 NAD+ --> 1.0 NADH + 1.0 histidinal + 1.0 H+ # source: MetaCyc, BRENDA,
KEGG (queried 1.1.1.23)
histidine-biosyn/10_1.1.1.23_HISTALDEHYD-RXN                      : 1.0 histidinal + 1.0 H2O + 1.0 NAD+ --> 2.0 H+ + 1.0 NADH + 1.0 L-histidine # source:
MetaCyc, BRENDA, KEGG (queried 1.1.1.23)
#####
#alanine biosyn
```

alanine-biosyn\_4.1.1.12\_ASPARTATE-4-DECARBOXYLASE-RXN : 1.0 H+ + 1.0 L-aspartate --> 1.0 CO2 + 1.0 L-alanine # source: MetaCyc, BRENDA, KEGG (queried 4.1.1.12)

alanine-biosyn\_2.6.1.2\_ALANINE-AMINOTRANSFERASE-RXN : 1.0 L-alanine + 1.0 2-oxoglutarate <=> 1.0 pyruvate + 1.0 L-glutamate # source: MetaCyc, BRENDA, KEGG (queried 2.6.1.2)

#####

#ornithine degr. II

ornithine-degr-II/1\_5.1.1.12\_ORNITHINE-RACEMASE-RXN : 1.0 L-ornithine <=> 1.0 D-ornithine # source: MetaCyc, BRENDA, KEGG (queried 5.1.1.12) // other EC numbers for this reaction: 5.1.1.9, 5.1.1.10

ornithine-degr-II/2\_5.4.3.5\_ORNMUTST-RXN : 1.0 D-ornithine <=> 1.0 (2R,4S)-2,\_4-diaminopentanoate # source: MetaCyc, BRENDA, KEGG (queried 5.4.3.5)

ornithine-degr-II/3\_1.4.1.12\_24-DIAMINOPENTANOATE-DEHYDROGENASE-RXN\_WOP : 1.0 (2R,4S)-2,\_4-diaminopentanoate + 1.0 H2O + 1.0 NAD+ <=> 1.0 ammonium + 1.0 NADH + 1.0 H+ + 1.0 2-amino-4-oxopentanoate # source: MetaCyc, BRENDA, KEGG (queried 1.4.1.12)

ornithine-degr-II/4\_2.3.1.10\_AKPHTIOL-RXN : 1.0 2-amino-4-oxopentanoate + 1.0 coenzyme\_A <=> 1.0 acetyl-CoA + 1.0 D-alanine # source: MetaCyc, BRENDA, KEGG (queried 2.3.1.10) // other EC numbers for this reaction: 2.3.1

#####

#pro degr

proline-degr/1\_5.1.1.4\_PROLINE-RACEMASE-RXN : 1.0 L-proline <=> 1.0 D-proline # source: MetaCyc, BRENDA, KEGG (queried 5.1.1.4)

proline-degr/2\_1.21.4.1\_BS370299 : 1.0 H+ + 1.0 D-proline + 1.0 NADH <=> 1.0 5-aminopentanoate + 1.0 NAD+ # source: BRENDA (queried 1.21.4.1) // contains implicit reactant(s): H+, H2O

#####

#glycine degr.

glycine-cleavage/1\_moddir\_1.4.4.2\_GCVF-RXN : 1.0 glycine + 1.0 lipoamide + 1.0 H+ <=> 1.0 [glycine-cleavage\_complex\_H\_protein]\_N6-aminomethyldihydropolyl-L-lysine + 1.0 CO2 # source: MetaCyc (queried 1.4.4.2)

glycine-cleavage/2\_2.1.2.10\_GCVT-RXN : 1.0 tetrahydropteroyl-tri-L-glutamate + 1.0 [glycine-cleavage\_complex\_H\_protein]\_N6-aminomethyldihydropolyl-L-lysine <=> 1.0 dihydrolipoamide + 1.0 5,10-methylene-tetrahydrofolate + 1.0 ammonium # source: MetaCyc (queried 2.1.2.10)

glycine-cleavage/3\_1.8.1.4\_RXN-7719 : 1.0 NAD+ + 1.0 dihydrolipoamide <=> 1.0 lipoamide + 1.0 NADH + 1.0 H+ # source: MetaCyc (queried 1.8.1.4)

glycine-degr/1\_1.21.4.2\_RXN-7566 : 1.0 [Ox-Thioredoxin] + 1.0 H2O + 1.0 ammonium + 1.0 acetyl\_phosphate <-- 1.0 [Red-Thioredoxin] + 1.0 H+ + 1.0 phosphate + 1.0 glycine # source: MetaCyc, KEGG (queried 1.21.4.2)

glycine-degr/2\_1.8.1.9\_THIOREDOXIN-REDUCT-NADPH-RXN : 1.0 NADP+ + 1.0 [Red-Thioredoxin] <-- 1.0 NADPH + 1.0 H+ + 1.0 [Ox-Thioredoxin] # source: MetaCyc, KEGG (queried 1.8.1.9)

#####

#chorismate biosyn I

chorismate-biosyn-I/1\_2.5.1.54\_DAHPSYN-RXN : 1.0 H2O + 1.0 phosphoenolpyruvate + 1.0 D-erythrose\_4-phosphate <=> 1.0 phosphate + 1.0 3-deoxy-D-arabino-heptulosonate-7-phosphate # source: MetaCyc, BRENDA, KEGG (queried 2.5.1.54)

chorismate-biosyn-I/2\_4.2.3.4\_3-DEHYDROQUINATE-SYNTHASE-RXN : 1.0 3-deoxy-D-arabino-heptulosonate-7-phosphate --> 1.0 phosphate + 1.0 3-dehydroquininate # source: MetaCyc, BRENDA, KEGG (queried 4.2.3.4)

chorismate-biosyn-I/3\_4.2.1.10\_3-DEHYDROQUINATE-DEHYDRATASE-RXN : 1.0 3-dehydroquininate <=> 1.0 H2O + 1.0 3-dehydroshikimate # source: MetaCyc, BRENDA, KEGG (queried 4.2.1.10)

chorismate-biosyn-I/4\_1.1.1.25\_RXN-7968 : 1.0 shikimate + 1.0 NADP+ <-- 1.0 3-dehydroshikimate + 1.0 H+ + 1.0 NADPH # source: MetaCyc, BRENDA, KEGG (queried 1.1.1.25) // other EC numbers for this reaction: 1.1.1.282, 1.1.1.24

chorismate-biosyn-I/5\_2.7.1.71\_SHIKIMATE-KINASE-RXN : 1.0 ATP + 1.0 shikimate --> 1.0 H+ + 1.0 ADP + 1.0 shikimate\_3-phosphate # source: MetaCyc, BRENDA, KEGG (queried 2.7.1.71)

chorismate-biosyn-I/6\_2.5.1.19\_2.5.1.19-RXN : 1.0 phosphoenolpyruvate + 1.0 shikimate\_3-phosphate <=> 1.0 5-enolpyruvyl-shikimate\_3-phosphate + 1.0 phosphate # source: MetaCyc, BRENDA, KEGG (queried 2.5.1.19)

chorismate-biosyn-I/7\_4.2.3.5\_CHORISMATE-SYNTHASE-RXN : 1.0 5-enolpyruvyl-shikimate\_3-phosphate --> 1.0 phosphate + 1.0 chorismate # source: MetaCyc, BRENDA, KEGG (queried 4.2.3.5)

#####

#tyr/phe biosyn

tyr/phe-biosyn\_5.4.99.5\_CHORISMATEMUT-RXN : 1.0 chorismate <=> 1.0 prephenate # source: MetaCyc, BRENDA, KEGG (queried 5.4.99.5)

tyrosine-biosyn\_I/1\_1.3.1.12\_PREPHENATEDEHYDRG-RXN : 1.0 prephenate + 1.0 NAD+ --> 1.0 4-hydroxyphenylpyruvate + 1.0 CO2 + 1.0 NADH # source: MetaCyc, BRENDA, KEGG (queried 1.3.1.12)

tyrosine-biosyn\_I/2a\_2.6.1.9\_2.6.1.1\_2.6.1.57\_TYROSINE-AMINOTRANSFERASE-RXN : 1.0 L-tyrosine + 1.0 2-oxoglutarate <=> 1.0 4-hydroxyphenylpyruvate + 1.0 L-glutamate # source: MetaCyc, BRENDA, KEGG (queried 2.6.1.9, 2.6.1.1, 2.6.1.57) // other EC numbers for this reaction: 2.6.1.5

tyrosine-biosyn\_I/2b\_2.6.1.51\_RXN30-4157 : 1.0 L-tyrosine + 1.0 pyruvate <=> 1.0 L-alanine + 1.0 4-hydroxyphenylpyruvate # source: MetaCyc, BRENDA, KEGG (queried 2.6.1.51) // other EC numbers for this reaction: 2.6.1.44, 2.6.1.58

phenylalanine-biosyn-I/1\_4.2.1.51\_PREPHENATEDEHYDRAT-RXN : 1.0 prephenate + 1.0 H+ --> 1.0 2-oxo-3-phenylpropanoate + 1.0 CO2 + 1.0 H2O # source: MetaCyc, BRENDA, KEGG (queried 4.2.1.51) // other EC numbers for this reaction: 4.2.1.91

phenylalanine-biosyn-I/2a\_2.6.1.57\_2.6.1.9\_2.6.1.1\_2.6.1.42\_PHEAMINOTRANS-RXN : 1.0 L-glutamate + 1.0 2-oxo-3-phenylpropanoate <=> 1.0 2-oxoglutarate + 1.0 L-phenylalanine # source: MetaCyc, BRENDA, KEGG (queried 2.6.1.57, 2.6.1.9, 2.6.1.1, 2.6.1.42) // there are 5 more EC numbers for this reaction

```

phenylalanine-biosyn-I/2b_2.6.1.57_RXN-7708 : 1.0 2-oxo-3-phenylpropanoate + 1.0 L-methionine <=> 1.0 2-oxo-4-methylthiobutanoate + 1.0 L-phenylalanine # source: MetaCyc, BRENDA (queried 2.6.1.57) // other EC numbers for this reaction: 2.6.1.28

#side reactions
phenylalanine-biosyn-II/1_2.6.1.57_PREPHENATE-ASP-TRANSAMINE-RXN : 1.0 oxaloacetate + 1.0 L-arogenate <=> 1.0 L-aspartate + 1.0 prephenate # source: MetaCyc, BRENDA, KEGG (queried 2.6.1.57) // other EC numbers for this reaction: 2.6.1.78
phenylalanine-biosyn-II/2_4.2.1.51_CARBOXYCYCLOHEXADIENYL-DEHYDRATASE-RXN : 1.0 H+ + 1.0 L-arogenate --> 1.0 L-phenylalanine + 1.0 CO2 + 1.0 H2O # source: MetaCyc, BRENDA, KEGG (queried 4.2.1.51) // other EC numbers for this reaction: 4.2.1.91

methionine-from-2-oxo-4-methylthiobutanoate_2.6.1.57_RXN-14147 : 1.0 2-oxoglutarate + 1.0 L-methionine <=> 1.0 2-oxo-4-methylthiobutanoate + 1.0 L-glutamate # source: MetaCyc, BRENDA, KEGG (queried 2.6.1.57) // other EC numbers for this reaction: 2.6.1.5, 2.6.1.7
#####
#trp/tyr/phe/his degr

tryptophan-degr_2.6.1.27_TRYPTOPHAN-AMINOTRANSFERASE-RXN : 1.0 L-tryptophan + 1.0 2-oxoglutarate <=> 1.0 L-glutamate + 1.0 indole-3-pyruvate # source: MetaCyc, BRENDA, KEGG (queried 2.6.1.27)
tryptophan-degr_2.6.1.57_RXN-14685 : 1.0 indole-3-pyruvate + 1.0 L-methionine <=> 1.0 2-oxo-4-methylthiobutanoate + 1.0 L-tryptophan # source: MetaCyc, BRENDA (queried 2.6.1.57)
histidine-degr_2.6.1.38_HISTRANSAM-RXN : 1.0 L-histidine + 1.0 2-oxoglutarate <=> 1.0 imidazole-pyruvate + 1.0 L-glutamate # source: MetaCyc, BRENDA, KEGG (queried 2.6.1.38)

tryptophan-ox/1_1.2.7.8_1.2.7.8-RXN : 1.0 coenzyme_A + 2.0 |Oxidized-ferredoxins| + 1.0 indole-3-pyruvate --> 2.0 |Reduced-ferredoxins| + 1.0 S-2-(indol-3-yl)acetyl-CoA + 1.0 H+ + 1.0 CO2 # source: MetaCyc, KEGG (queried 1.2.7.8)
tyrosine-ox/1_manual_1.2.7.8_HD-1.2.7.8-tyr : 1.0 4-hydroxyphenylpyruvate + 2.0 |Oxidized-ferredoxins| + 1.0 coenzyme_A --> 1.0 CO2 + 2.0 |Reduced-ferredoxins| + 1.0 4-hydroxyphenylacetyl-CoA + 1.0 H+
phenylalanine-ox/1_manual_1.2.7.8_HD-1.2.7.8-phe : 1.0 2-oxo-3-phenylpropanoate + 2.0 |Oxidized-ferredoxins| + 1.0 coenzyme_A --> 1.0 CO2 + 2.0 |Reduced-ferredoxins| + 1.0 phenylacetyl-CoA
histidine-ox/1_manual_1.2.7.8_HD-1.2.7.8-his : 1.0 imidazole-pyruvate + 2.0 |Oxidized-ferredoxins| + 1.0 coenzyme_A --> 1.0 CO2 + 2.0 |Reduced-ferredoxins| + 1.0 imidazolylacetyl-CoA

tryptophan-ox/2_manual_2.3.1.-_HD-2.3.1.-trp : 1.0 S-2-(indol-3-yl)acetyl-CoA + 1.0 phosphate --> 1.0 indole-3-acetyl_phosphate + 1.0 coenzyme_A
tyrosine-ox/2_2.3.1.-_manual_HD-2.3.1.-tyr : 1.0 4-hydroxyphenylacetyl-CoA + 1.0 phosphate --> 1.0 4-hydroxyphenylacetyl_phosphate + 1.0 coenzyme_A
phenylalanine-ox/2_2.3.1.-_manual_HD-2.3.1.-phe : 1.0 phenylacetyl-CoA + 1.0 phosphate --> 1.0 phenylacetyl_phosphate + 1.0 coenzyme_A
histidine-ox/2_2.3.1.-_manual_HD-2.3.1.-his : 1.0 imidazolylacetyl-CoA + 1.0 phosphate --> 1.0 imidazolylacetyl_phosphate + 1.0 coenzyme_A

tryptophan-ox/3_manual_2.7.2.-_HD-2.7.2.-trp : 1.0 indole-3-acetyl_phosphate + 1.0 ADP --> 1.0 indole-3-acetate + 1.0 ATP
tyrosine-ox/3_manual_2.7.2.-_HD-2.7.2.-tyr : 1.0 4-hydroxyphenylacetyl_phosphate + 1.0 ADP --> 1.0 4-hydroxyphenylacetate + 1.0 ATP
phenylalanine-ox/3_manual_2.7.2.-_HD-2.7.2.-phe : 1.0 phenylacetyl_phosphate + 1.0 ADP --> 1.0 phenylacetate + 1.0 ATP
histidine-ox/3_manual_2.7.2.-_HD-2.7.2.-his : 1.0 imidazolylacetyl_phosphate + 1.0 ADP --> 1.0 4-imidazoleacetate + 1.0 ATP

tyrosine-ox/4_4.1.1.83_4.1.1.83-RXN : 1.0 H+ + 1.0 4-hydroxyphenylacetate --> 1.0 CO2 + 1.0 4-methylphenol # source: MetaCyc, BRENDA, KEGG (queried 4.1.1.83)
#####
#arom red
phe-red/1_1.1.1.222_BS186998 : 1.0 (R)-phenyllactate + 1.0 NAD+ <-- 1.0 H+ + 1.0 NADH + 1.0 2-oxo-3-phenylpropanoate # source: BRENDA, KEGG (queried 1.1.1.222) // other EC numbers for this reaction: 1.1.1.110, 1.1.1.237 // balanced // contains implicit reactant(s): H+, H2O
phe-red/2_manual_2.8.3.-_HD-2.8.3.-phe : 1.0 (R)-phenyllactoyl-CoA + 1.0 3-phenylpropanoate <=> 1.0 3-phenylpropanoyl-CoA + 1.0 (R)-phenyllactate
phe-red/3_manual_4.2.1.-_HD-4.2.1.-phe : 1.0 (R)-phenyllactoyl-CoA --> 1.0 3-phenylacryloyl-CoA + 1.0 H2O
phe-red/4_manual_1.3.98.-_HD-1.3.98.-phe : 1.0 3-phenylacryloyl-CoA + 2.0 NADH + 2.0 |Oxidized-ferredoxins| <=> 1.0 3-phenylpropanoyl-CoA + 2.0 |Reduced-ferredoxins| + 2.0 NAD+

tyr-red/1_1.1.1.222_1.1.1.222-RXN_WOP : 1.0 NADH + 1.0 4-hydroxyphenylpyruvate + 1.0 H+ <=> 1.0 (R)-3-(4-hydroxyphenyl)lactate + 1.0 NAD+ # source: MetaCyc, BRENDA, KEGG (queried 1.1.1.222)
tyr-red/2_manual_2.8.3.-_HD-2.8.3.-tyr : 1.0 (R)-(4-hydroxyphenyl)lactoyl-CoA + 1.0 3-(4-hydroxyphenyl)propanoate <=> 1.0 3-(4-hydroxyphenyl)propanoyl-CoA + 1.0 (R)-3-(4-hydroxyphenyl)lactate
tyr-red/3_manual_4.2.1.-_HD-4.2.1.-tyr : 1.0 (R)-(4-hydroxyphenyl)lactoyl-CoA --> 1.0 3-(4-hydroxyphenyl)acryloyl-CoA + 1.0 H2O
tyr-red/4_manual_1.3.98.-_HD-1.3.98.-tyr : 1.0 3-(4-hydroxyphenyl)acryloyl-CoA + 2.0 NADH + 2.0 |Oxidized-ferredoxins| <=> 1.0 3-(4-hydroxyphenyl)propanoyl-CoA + 2.0 |Reduced-ferredoxins| + 2.0 NAD+
#####
#valine biosyn
valine-biosyn/1_2.2.1.6_RXN-12583 : 1.0 thiamine_diphosphate + 1.0 pyruvate + 1.0 H+ --> 1.0 2-(alpha-

```



```

hydroxyethyl)thiamine_diphosphate + 1.0 CO2 # source: MetaCyc, KEGG (queried 2.2.1.6) // other EC numbers for this reaction: 4.1.1.1, 1.2.4.1
valine-biosyn/2_2.2.1.6_RXN-14037 : 1.0 (S)-2-acetolactate + 1.0 thiamine_diphosphate <=> 1.0 2-(alpha-
hydroxyethyl)thiamine_diphosphate + 1.0 pyruvate # source: MetaCyc, KEGG (queried 2.2.1.6)
valine-biosyn/3_1.1.1.86_RXN-16061 : 1.0 NADP+ + 1.0 (2R)-2,3-dihydroxy-3-methylbutanoate <=> 1.0 H+ + 1.0 (S)-2-acetolactate +
1.0 NADPH # source: MetaCyc, BRENDA, KEGG (queried 1.1.1.86) // other EC numbers for this reaction: 1.1.1.383
valine-biosyn/4_4.2.1.9_DIHYDROXYISOVALDEHYDRAT-RXN : 1.0 (2R)-2,3-dihydroxy-3-methylbutanoate --> 1.0 H2O + 1.0 3-methyl-2-oxobutanoate # source:
MetaCyc, KEGG (queried 4.2.1.9)

valine-biosyn/5_2.6.1.42_BRANCHED-CHAINAMINOTRANSFERVAL-RXN : 1.0 2-oxoglutarate + 1.0 L-valine <=> 1.0 3-methyl-2-oxobutanoate + 1.0 L-glutamate #
source: MetaCyc, BRENDA, KEGG (queried 2.6.1.42) // other EC numbers for this reaction: 2.6.1.6
#####
#leucine biosyn
leucine-biosyn/1_2.3.3.13_2-ISOPROPYLMALATESYN-RXN : 1.0 H2O + 1.0 acetyl-CoA + 1.0 3-methyl-2-oxobutanoate --> 1.0 H+ + 1.0 coenzyme_A + 1.0
(2S)-2-isopropylmalate # source: MetaCyc, BRENDA, KEGG (queried 2.3.3.13)
leucine-biosyn/2_4.2.1.33_RXN-13163 : 1.0 (2R,3S)-3-isopropylmalate <=> 1.0 (2S)-2-isopropylmalate # source: MetaCyc, BRENDA, KEGG
(queried 4.2.1.33)
leucine-biosyn/3_1.1.1.85_3-ISOPROPYLMALDEHYDROG-RXN : 1.0 NAD+ + 1.0 (2R,3S)-3-isopropylmalate <=> 1.0 H+ + 1.0 NADH + 1.0 (2S)-2-isopropyl-3-
oxosuccinate # source: MetaCyc, BRENDA, KEGG (queried 1.1.1.85)
leucine-biosyn/4_spontaneous_1.1.1.85_RXN-7800 : 1.0 (2S)-2-isopropyl-3-oxosuccinate + 1.0 H+ --> 1.0 4-methyl-2-oxopentanoate + 1.0 CO2 #
source: MetaCyc, KEGG (queried 1.1.1.85)

leucine-biosyn/5_2.6.1.42_BRANCHED-CHAINAMINOTRANSFERLEU-RXN : 1.0 L-leucine + 1.0 2-oxoglutarate <=> 1.0 4-methyl-2-oxopentanoate + 1.0 L-glutamate #
source: MetaCyc, BRENDA, KEGG (queried 2.6.1.42) // other EC numbers for this reaction: 2.6.1.67, 2.6.1.6
#####
#isoleucine biosyn
isoleucine-biosyn-II/1_2.3.1.182_RXN-7743 : 1.0 pyruvate + 1.0 acetyl-CoA + 1.0 H2O --> 1.0 H+ + 1.0 (R)-citramalate + 1.0 coenzyme_A #
source: MetaCyc, BRENDA, KEGG (queried 2.3.1.182)
isoleucine-biosyn-II/2_4.2.1.35_R-2-METHYLMALATE-DEHYDRATASE-RXN : 1.0 (R)-citramalate <=> 1.0 H2O + 1.0 citraconate # source: MetaCyc, BRENDA, KEGG (queried
4.2.1.35)
isoleucine-biosyn-II/3_4.2.1.35_RXN-7744 : 1.0 citraconate + 1.0 H2O --> 1.0 (2R,3S)-3-methylmalate # source: MetaCyc, KEGG (queried
4.2.1.35)
isoleucine-biosyn-II/4_1.1.1.85_RXN-7745 : 1.0 NAD+ + 1.0 (2R,3S)-3-methylmalate --> 1.0 CO2 + 1.0 2-oxobutanoate + 1.0 NADH # source:
MetaCyc, KEGG (queried 1.1.1.85) // other EC numbers for this reaction: 1.1.1
isoleucine-biosyn-II/5_2.2.1.6_R04673 : 1.0 2-oxobutanoate + 1.0 2-(alpha-hydroxyethyl)thiamine_diphosphate <=> 1.0
thiamine_diphosphate + 1.0 (S)-2-aceto-2-hydroxybutanoate # source: KEGG (queried 2.2.1.6)
isoleucine-biosyn-II/6_1.1.1.86_ACETOHBUTREDUCTOISOM-RXN : 1.0 (R)-2,3-dihydroxy-3-methylpentanoate + 1.0 NADP+ <- 1.0 NADPH + 1.0 (S)-2-aceto-2-
hydroxybutanoate + 1.0 H+ # source: MetaCyc (queried 1.1.1.86)
isoleucine-biosyn-II/7_4.2.1.9_DIHYDROXYMETVALDEHYDRAT-RXN : 1.0 (R)-2,3-dihydroxy-3-methylpentanoate --> 1.0 H2O + 1.0 (S)-3-methyl-2-oxopentanoate #
source: MetaCyc, KEGG (queried 4.2.1.9)
isoleucine-biosyn-II/8_2.6.1.42_BRANCHED-CHAINAMINOTRANSFERILEU-RXN : 1.0 L-isoleucine + 1.0 2-oxoglutarate <=> 1.0 (S)-3-methyl-2-oxopentanoate + 1.0 L-glutamate
# source: MetaCyc, BRENDA, KEGG (queried 2.6.1.42) // other EC numbers for this reaction: 2.6.1.67
#####
#val/leu/ile degr ox
valine-ox/1_1.2.7.7_1.2.7.7-RXN : 1.0 coenzyme_A + 1.0 3-methyl-2-oxobutanoate + 2.0 |Oxidized-ferredoxins| --> 1.0 CO2 + 2.0 |
Reduced-ferredoxins| + 1.0 H+ + 1.0 isobutanoyl-CoA # source: MetaCyc, KEGG (queried 1.2.7.7)
leucine-ox/1_manual_1.2.7.7_HD-1.2.7.7-leu : 1.0 4-methyl-2-oxopentanoate + 2.0 |Oxidized-ferredoxins| + 1.0 coenzyme_A --> 1.0
isovaleryl-CoA + 1.0 CO2 + 2.0 |Reduced-ferredoxins| + 1.0 H+
isoleucine-ox/1_manual_1.2.7.7_HD-1.2.7.7-ile : 1.0 (S)-3-methyl-2-oxopentanoate + 2.0 |Oxidized-ferredoxins| + 1.0 coenzyme_A --> 1.0 2-
methylbutanoyl-CoA + 1.0 CO2 + 2.0 |Reduced-ferredoxins| + 1.0 H+

valine-ox/2_manual_2.3.1.-_HD-2.3.1.-val : 1.0 isobutanoyl-CoA + 1.0 phosphate --> 1.0 isobutyryl_phosphate + 1.0 coenzyme_A
leucine-ox/2_manual_2.3.1.-_HD-2.3.1.-leu : 1.0 isovaleryl-CoA + 1.0 phosphate --> 1.0 isovaleryl_phosphate + 1.0 coenzyme_A
isoleucine-ox/2_manual_2.3.1.-_HD-2.3.1.-ile : 1.0 2-methylbutanoyl-CoA + 1.0 phosphate --> 1.0 2-methylbutanoyl_phosphate + 1.0 coenzyme_A

valine-ox/3_manual_2.7.2.-_HD-2.7.2.-val : 1.0 isobutyryl_phosphate + 1.0 ADP --> 1.0 isobutyrate + 1.0 ATP
leucine-ox/3_manual_2.7.2.-_HD-2.7.2.-leu : 1.0 isovaleryl_phosphate + 1.0 ADP --> 1.0 isovalerate + 1.0 ATP
isoleucine-ox/3_manual_2.7.2.-_HD-2.7.2.-ile : 1.0 2-methylbutanoyl_phosphate + 1.0 ADP --> 1.0 2-methylbutanoate + 1.0 ATP
#####
#leu degr red
leu-red/1_manual_1.1.1.345_HD-1.1.1.345 : 1.0 D-2-hydroxyisocaproate + 1.0 NAD+ <- 1.0 4-methyl-2-oxopentanoate + 1.0 H+ + 1.0 NADH
leu-red/2a_manual_2.8.3.-_HD-2.8.3.-leu-A : 1.0 D-2-hydroxyisocaproyl-CoA + 1.0 isocaproate <=> 1.0 isocaproyl-CoA + 1.0 D-2-
hydroxyisocaproate

```

```

leu-red/3_manual_4.2.1.-_HD-4.2.1.-leu : 1.0 D-2-hydroxyisocaproyl-CoA --> 1.0 2-isocaproenoyl-CoA + 1.0 H2O
leu-red/4_manual_1.3.98.-_HD-1.3.98.-leu : 1.0 2-isocaproenoyl-CoA + 2.0 NADH + 2.0 [Oxidized-ferredoxins] <=> 1.0 isocaproyl-CoA + 2.0 |
Reduced-ferredoxins| + 2.0 NAD+ # Li et al. 2007: Coupled Ferredoxin and Crotonyl ...; Blast and position
#for the fatty acids
leu-red/2b_manual_2.8.3.-_HD-2.8.3.-leu-B : 1.0 D-2-hydroxyisocaproyl-CoA + 1.0 acetate <=> 1.0 acetyl-CoA + 1.0 D-2-hydroxyisocaproate
leu-red/5_manual_2.3.1.-_HD-2.3.1.-leu-red : 1.0 isocaproyl-CoA + 1.0 phosphate --> 1.0 isocaproyl_phosphate + 1.0 coenzyme_A
#####
#pyruvate decarbox.
formate_2.3.1.54_PYRUVFORMLY-RXN : 1.0 formate + 1.0 acetyl-CoA <=> 1.0 coenzyme_A + 1.0 pyruvate # source: MetaCyc, BRENDA,
KEGG (queried 2.3.1.54)
formate_2.3.1.54_KETOBUTFORMLY-RXN : 1.0 coenzyme_A + 1.0 2-oxobutanoate --> 1.0 formate + 1.0 propanoyl-CoA # source: MetaCyc,
BRENDA, KEGG (queried 2.3.1.54) // other EC numbers for this reaction: 2.3.1
#####
#ferm. EtOH/PropOH/ButOH:
ferm-EtOH/1_1.2.1.10_ACETALD-DEHYDROG-RXN : 1.0 NAD+ + 1.0 coenzyme_A + 1.0 acetaldehyde <=> 1.0 acetyl-CoA + 1.0 H+ + 1.0 NADH #
source: MetaCyc, BRENDA, KEGG (queried 1.2.1.10)
ferm-EtOH/2_1.1.1.1_ALCOHOL-DEHYDROGENASE-NADP+-RXN_WOP : 1.0 ethanol + 1.0 NAD+ <=> 1.0 H+ + 1.0 NADH + 1.0 acetaldehyde # source: MetaCyc, BRENDA,
KEGG (queried 1.1.1.1) // other EC numbers for this reaction: 1.1.1.71

ferm-PropOH/1_1.2.1.87_RXN-12736 : 1.0 coenzyme_A + 1.0 NAD+ + 1.0 propanal <=> 1.0 NADH + 1.0 H+ + 1.0 propanoyl-CoA # source:
MetaCyc, BRENDA, KEGG (queried 1.2.1.87)
ferm-PropOH/2_1.1.1.1_RXN-13198 : 1.0 n-propanol + 1.0 NAD+ <=> 1.0 H+ + 1.0 propanal + 1.0 NADH # source: MetaCyc, BRENDA,
KEGG (queried 1.1.1.1) // other EC numbers for this reaction: 1.1.1.202, 1.1.1.265

ferm-ButOH/1_1.2.1.10_1.2.1.87_BUTANAL-DEHYDROGENASE-RXN_WOP : 1.0 butanal + 1.0 coenzyme_A + 1.0 NAD+ <=> 1.0 butanoyl-CoA + 1.0 NADH + 1.0 H+ # source:
MetaCyc, BRENDA, KEGG (queried 1.2.1.10, 1.2.1.87) // other EC numbers for this reaction: 1.2.1.57
ferm-ButOH/2_1.1.1.-_RXN-161 : 1.0 n-butanol + 1.0 NAD+ <-> 1.0 NADH + 1.0 butanal + 1.0 H+ # source: MetaCyc, BRENDA, KEGG
(queried 1.1.1.-) // other EC numbers for this reaction: 1.1.1, 1.1.1.265

ferm-IbutOH/1_1.2.1.10_RXN-13671 : 1.0 NAD+ + 1.0 coenzyme_A + 1.0 isobutanal <=> 1.0 H+ + 1.0 NADH + 1.0 isobutanoyl-CoA #
source: MetaCyc, BRENDA (queried 1.2.1.10)
ferm-IbutOH/2_1.1.1.1_RXN-7657 : 1.0 NAD+ + 1.0 isobutanol <=> 1.0 NADH + 1.0 isobutanal + 1.0 H+ # source: MetaCyc, BRENDA
(queried 1.1.1.1)
#####
#ferm acetate/propanoate
ferm-acetate/1_1.2.7.1_PYRUFILAVREDUCT-RXN : 1.0 coenzyme_A + 1.0 pyruvate + 2.0 [Oxidized-ferredoxins] <=> 1.0 acetyl-CoA + 2.0 [Reduced-
ferredoxins] + 1.0 H+ + 1.0 C02 # source: MetaCyc, KEGG (queried 1.2.7.1) // other EC numbers for this reaction: 1.2.7.11
ferm-acetate/2_2.3.1.8_PHOSACETYLTRANS-RXN : 1.0 acetyl-CoA + 1.0 phosphate <=> 1.0 acetyl_phosphate + 1.0 coenzyme_A # source: MetaCyc,
BRENDA, KEGG (queried 2.3.1.8)
ferm-acetate/3_2.7.2.1_moddir_ACETATEKIN-RXN : 1.0 ATP + 1.0 acetate <=> 1.0 acetyl_phosphate + 1.0 ADP # source: MetaCyc, BRENDA, KEGG
(queried 2.7.2.1) // other EC numbers for this reaction: 2.7.2.15

ferm-propanoate/1_1.2.7.1_2-OXOBUTYRATE-SYNTASE-RXN : 1.0 2-oxobutanoate + 1.0 coenzyme_A + 2.0 [Oxidized-ferredoxins] <=> 1.0 H+ + 1.0 propanoyl-
CoA + 1.0 C02 + 2.0 [Reduced-ferredoxins] # source: MetaCyc, KEGG (queried 1.2.7.1) // other EC numbers for this reaction: 1.2.7
ferm-propanoate/2_2.3.1.222_2.3.1.8_PTAALT-RXN : 1.0 phosphate + 1.0 propanoyl-CoA <=> 1.0 coenzyme_A + 1.0 propanoyl_phosphate # source:
MetaCyc, BRENDA, KEGG (queried 2.3.1.222, 2.3.1.8)
ferm-propanoate/3_2.7.2.1_moddir_PROPKIN-RXN : 1.0 propanoate + 1.0 ATP <=> 1.0 ADP + 1.0 propanoyl_phosphate # source: MetaCyc, BRENDA,
KEGG (queried 2.7.2.1) // other EC numbers for this reaction: 2.7.2.15
#####
#6.2.1.13
#Homolog to priviously characterized Isoenzyme I of Archaeoglobus fulgidus (Musfeldt and Schönheit, 2002)
acetyl-CoA-to-acid_6.2.1.13_ACETATE--COA-LIGASE-ADP-FORMING-RXN : 1.0 ATP + 1.0 coenzyme_A + 1.0 acetate <=> 1.0 ADP + 1.0 acetyl-CoA + 1.0 phosphate #
source: MetaCyc, BRENDA, KEGG (queried 6.2.1.13)
propanoyl-CoA-to-acid_6.2.1.13_PROANOATECOA-LIGASE-RXN : 1.0 propanoate + 1.0 coenzyme_A + 1.0 ATP <=> 1.0 propanoyl-CoA + 1.0 phosphate + 1.0 ADP #
source: MetaCyc, BRENDA, KEGG (queried 6.2.1.13)
butanoyl-CoA-to-acid_manual_6.2.1.13_HD-6.2.1.13 : 1.0 ATP + 1.0 coenzyme_A + 1.0 butanoate <=> 1.0 ADP + 1.0 butanoyl-CoA + 1.0 phosphate
#####
#fermentation to propanoate C (stickland-reductive-like)
propanoate-ferm/1a_2.8.3.-_PROPIONLACT-RXN : 1.0 propanoyl-CoA + 1.0 (S)-lactate <=> 1.0 (S)-lactoyl-CoA + 1.0 propanoate #
source: MetaCyc, KEGG (queried 2.8.3.-) // other EC numbers for this reaction: 2.8.3.1, 2.8.3
propanoate-ferm/2a_4.2.1.54_RXN-781 : 1.0 (S)-lactoyl-CoA <=> 1.0 H2O + 1.0 acryloyl-CoA # source: MetaCyc, BRENDA, KEGG
(queried 4.2.1.54) // other EC numbers for this reaction: 4.2.1
propanoate-ferm/1b_2.8.3.-_LACCOA-RXN : 1.0 propanoyl-CoA + 1.0 (R)-lactate <=> 1.0 (R)-lactoyl-CoA + 1.0 propanoate #
source: MetaCyc, BRENDA (queried 2.8.3.-) // other EC numbers for this reaction: 2.8.3.1, 2.8.3

```

```

propanoate-ferm/2b_4.2.1.54_LACTOYL-COA-DEHYDRATASE-RXN          : 1.0 (R)-lactoyl-CoA <=> 1.0 acryloyl-CoA + 1.0 H2O # source: MetaCyc, BRENDA
(queried 4.2.1.54)
propanoate-ferm/3_manual_1.3.98.-_HD-1.3.98.-prop            : 1.0 acryloyl-CoA + 2.0 NADH + 2.0 [Oxidized-ferredoxins] --> 1.0 propanoyl-CoA +
2.0 [Reduced-ferredoxins] + 2.0 NAD+ # Bifurcating like Li et al. 2007: Coupled Ferredoxin and Crotonyl ...
#propanoate-ferm/3_1.3.1.95_RXN-8568                          : 1.0 acryloyl-CoA + 1.0 NADH + 1.0 H+ --> 1.0 propanoyl-CoA + 1.0 NAD+ # source:
MetaCyc, BRENDA, KEGG (queried 1.3.1.95)
#####
#lactate metabolism
#Both lactate dehydrogenases irreversible to prevent cycles
pyruvate-ferm-to-lactate_moddir_1.1.1.27_L-LACTATE-DEHYDROGENASE-RXN : 1.0 (S)-lactate + 1.0 NAD+ <-- 1.0 H+ + 1.0 NADH + 1.0 pyruvate # source: MetaCyc,
BRENDA, KEGG (queried 1.1.1.27)
lactate-receamation_5.1.2.1_LACTATE-RACEMASE-RXN             : 1.0 (S)-lactate <=> 1.0 (R)-lactate # source: MetaCyc, BRENDA, KEGG (queried
5.1.2.1)
lactate-oxidation_manual_1.1.98.-_HD-1.1.98.-pyr            : 1.0 pyruvate + 2.0 NADH + 2.0 [Oxidized-ferredoxins] <-- 1.0 (R)-lactate + 2.0 [
Reduced-ferredoxins] + 2.0 NAD+
#####
#ferm. butanoate/butyrate
succinate-to-butyrate/1_2.8.3.18_RXN-8807                    : 1.0 acetate + 1.0 succinyl-CoA <=> 1.0 acetyl-CoA + 1.0 succinate # source:
MetaCyc, BRENDA, KEGG (queried 2.8.3.18)
succinate-to-butyrate/2_1.2.1.76_RXN-8891                    : 1.0 succinate_semialdehyde + 1.0 NADP+ + 1.0 coenzyme_A <-- 1.0 succinyl-CoA + 1.0
H+ + 1.0 NADPH # source: MetaCyc, BRENDA, KEGG (queried 1.2.1.76)
succinate-to-butyrate/3_1.1.1.61_RXN-6903_WOP                : 1.0 NAD+ + 1.0 4-hydroxybutanoate <=> 1.0 H+ + 1.0 NADH + 1.0
succinate_semialdehyde # source: MetaCyc, BRENDA, KEGG (queried 1.1.1.61) // other EC numbers for this reaction: 1.1.1
succinate-to-butyrate/4a_2.8.3.-_RXN-8889                    : 1.0 acetyl-CoA + 1.0 4-hydroxybutanoate --> 1.0 4-hydroxybutanoyl-CoA + 1.0 acetate
# source: MetaCyc, BRENDA, KEGG (queried 2.8.3.-) // other EC numbers for this reaction: 2.8.3.1, 2.8.3
succinate-to-butyrate/4b_manual_2.8.3.-_HD-4hbut             : 1.0 4-hydroxybutanoate + 1.0 butanoyl-CoA --> 1.0 4-hydroxybutanoyl-CoA + 1.0
butanoate
succinate-to-butyrate/5a_4.2.1.120_RXN-8890                   : 1.0 4-hydroxybutanoyl-CoA <=> 1.0 H2O + 1.0 crotonyl-CoA # source: MetaCyc,
BRENDA, KEGG (queried 4.2.1.120)
succinate-to-butyrate/5b_moddir_4.2.1.120_BS403853           : 1.0 4-hydroxybutanoyl-CoA <=> 1.0 vinylacetyl-CoA + 1.0 H2O # source: BRENDA, KEGG
(queried 4.2.1.120)
succinate-to-butyrate/6_5.3.3.3_VINYLLACETYL-COA-DELTA-ISOMERASE-RXN : 1.0 vinylacetyl-CoA <=> 1.0 crotonyl-CoA # source: MetaCyc, BRENDA, KEGG (queried
5.3.3.3)

acetyl-CoA-to-butyrate-II/1_2.3.1.9_ACETYL-COA-ACETYLTRANSFER-RXN : 2.0 acetyl-CoA <=> 1.0 acetoacetyl-CoA + 1.0 coenzyme_A # source: MetaCyc, BRENDA,
KEGG (queried 2.3.1.9)
#The enzyme of C. difficile uses NADH (Aboulnaga et al., 2013)
acetyl-CoA-to-butyrate-II/2_1.1.1.35_HD-1.1.1.35            : 1.0 (S)-3-hydroxybutanoyl-CoA + 1.0 NAD+ <-- 1.0 acetoacetyl-CoA + 1.0 NADH + 1.0
H+
acetyl-CoA-to-butyrate-II/3_4.2.1.150_RXN-11667              : 1.0 (S)-3-hydroxybutanoyl-CoA <=> 1.0 crotonyl-CoA + 1.0 H2O # source: MetaCyc,
BRENDA, KEGG (queried 4.2.1.150) // other EC numbers for this reaction: 4.2.1.17

crotonyl-CoA-to-butanoate/1_manual_1.3.98.-_HD-1.3.98.-but   : 1.0 crotonyl-CoA + 2.0 NADH + 2.0 [Oxidized-ferredoxins] <=> 1.0 butanoyl-CoA + 2.0
[Reduced-ferredoxins] + 2.0 NAD+
crotonyl-CoA-to-butanoate/2_2.3.1.19_PHOSPHATE-BUTYRYLTRANSFERASE-RXN : 1.0 phosphate + 1.0 butanoyl-CoA <=> 1.0 coenzyme_A + 1.0 butanoyl_phosphate #
source: MetaCyc, BRENDA, KEGG (queried 2.3.1.19)
crotonyl-CoA-to-butanoate/3_moddir_2.7.2.7_BUTYRATE-KINASE-RXN : 1.0 butanoate + 1.0 ATP <=> 1.0 ADP + 1.0 butanoyl_phosphate # source: MetaCyc,
BRENDA, KEGG (queried 2.7.2.7)

(R)-3-hydroxybutanoate-ferm/1a_2.8.3.9_2.8.3.9-RXN           : 1.0 acetoacetate + 1.0 butanoyl-CoA <=> 1.0 acetoacetyl-CoA + 1.0 butanoate #
source: MetaCyc, BRENDA, KEGG (queried 2.8.3.9)
(R)-3-hydroxybutanoate-ferm/1b_2.8.3.9_ACETOACETYL-COA-TRANSFER-RXN : 1.0 acetyl-CoA + 1.0 acetoacetate <=> 1.0 acetoacetyl-CoA + 1.0 acetate # source:
MetaCyc, BRENDA, KEGG (queried 2.8.3.9) // other EC numbers for this reaction: 2.8.3.8, 2.8.3
(R)-3-hydroxybutanoate-ferm/2_1.1.1.30_3-HYDROXYBUTYRATE-DEHYDROGENASE-RXN : 1.0 (R)-3-hydroxybutanoate + 1.0 NAD+ <=> 1.0 NADH + 1.0 acetoacetate + 1.0 H+ #
source: MetaCyc, BRENDA, KEGG (queried 1.1.1.30)

#spontaneous (Han et al. 2011)
acetone-fermentation_spontaneous_ACETOACETATE-DECARBOXYLASE-RXN : 1.0 acetoacetate + 1.0 H+ --> 1.0 acetone + 1.0 CO2 # source: MetaCyc, BRENDA,
KEGG
acetone-fermentation-ex_spontaneous_ACETOACETATE-DECARBOXYLASE-RXN : 1.0 acetoacetate[ex] + 1.0 H+[ex] --> 1.0 acetone[ex] + 1.0 CO2[ex] # source:
MetaCyc, BRENDA, KEGG
#####
#ferm. pentanoate

```

```

pentanoate-ferm/1_2.3.1.9_RXN-12561 : 1.0 acetyl-CoA + 1.0 propanoyl-CoA <=> 1.0 coenzyme_A + 1.0 beta-ketoaleryl-CoA #
source: MetaCyc, BRENDA (queried 2.3.1.9) // other EC numbers for this reaction: 2.3.1.16
pentanoate-ferm/2_manual_1.1.1.157_HD-1.1.1.157-pent : 1.0 (R)-3-hydroxypentanoyl-CoA + 1.0 NAD+ <- - 1.0 H+ + 1.0 NADH + 1.0 beta-
ketoaleryl-CoA
pentanoate-ferm/3_manual_4.2.1.150_HD-4.2.1.150-pent : 1.0 (R)-3-hydroxypentanoyl-CoA --> 1.0 2-pentenoyl-CoA + 1.0 H2O
pentanoate-ferm/4_manual_1.3.98.-_HD-1.3.98.-pent : 1.0 2-pentenoyl-CoA + 2.0 NADH + 2.0 |Oxidized-ferredoxins| <=> 1.0 pentanoyl-CoA +
2.0 |Reduced-ferredoxins| + 2.0 NAD+
pentanoate-ferm/5_manual_2.3.1.19_HD-2.3.1.19-pent : 1.0 pentanoyl-CoA + 1.0 phosphate --> 1.0 pentanoyl_phosphate + 1.0 coenzyme_A
pentanoate-ferm/6_manual_2.7.2.7_HD-2.7.2.7-pent : 1.0 pentanoyl_phosphate + 1.0 ADP --> 1.0 pentanoate + 1.0 ATP
#####
#ferm. hexanoate
hexanoate-ferm/1_2.3.1.9_RXN-12565 : 1.0 acetyl-CoA + 1.0 butanoyl-CoA --> 1.0 coenzyme_A + 1.0 3-oxohexanoyl-CoA #
source: MetaCyc, BRENDA, KEGG (queried 2.3.1.9) // other EC numbers for this reaction: 2.3.1.16, 2.3.1.155
hexanoate-ferm/2_manual_1.1.1.157_HD-1.1.1.157-hex : 1.0 (R)-3-hydroxyhexanoyl-CoA + 1.0 NAD+ <- - 1.0 H+ + 1.0 NADH + 1.0 3-oxohexanoyl-
CoA
hexanoate-ferm/3_manual_4.2.1.150_HD-4.2.1.150-hex : 1.0 (R)-3-hydroxyhexanoyl-CoA --> 1.0 2-hexenoyl-CoA + 1.0 H2O
hexanoate-ferm/4_manual_1.3.98.-_HD-1.3.98.-hex : 1.0 2-hexenoyl-CoA + 2.0 NADH + 2.0 |Oxidized-ferredoxins| <=> 1.0 hexanoyl-CoA +
2.0 |Reduced-ferredoxins| + 2.0 NAD+
hexanoate-ferm/5_manual_2.3.1.19_HD-2.3.1.19-hex : 1.0 hexanoyl-CoA + 1.0 phosphate --> 1.0 hexanoyl_phosphate + 1.0 coenzyme_A
hexanoate-ferm/6_manual_2.7.2.7_HD-2.7.2.7-hex : 1.0 hexanoyl_phosphate + 1.0 ADP --> 1.0 hexanoate + 1.0 ATP
#####
#5-aminoimidazole ribonucleotide biosynthesis II
5-aminoimidazole-ribonucleotide-biosyn-II/1_2.4.2.14_PRPPAMIDOTRANS-RXN : 1.0 diphosphate + 1.0 L-glutamate + 1.0 5-phospho-beta-D-ribosylamine <=> 1.0 L-
glutamine + 1.0 H2O + 1.0 5-phospho-alpha-D-ribose_1-diphosphate # source: MetaCyc, BRENDA, KEGG (queried 2.4.2.14)
5-aminoimidazole-ribonucleotide-biosyn-II/2_6.3.4.13_GLYRIBONUCSYN-RXN : 1.0 glycine + 1.0 ATP + 1.0 5-phospho-beta-D-ribosylamine --> 1.0 H+ + 1.0
phosphate + 1.0 ADP + 1.0 N1-(5-phospho-beta-D-ribosyl)glycinamide # source: MetaCyc, BRENDA, KEGG (queried 6.3.4.13)
5-aminoimidazole-ribonucleotide-biosyn-II/3_2.1.2.2_GART-RXN : 1.0 10-formyltetrahydrofolate + 1.0 N1-(5-phospho-beta-D-ribosyl)glycinamide <=>
1.0 tetrahydropteroyl_tri-L-glutamate + 1.0 N2-formyl-N1-(5-phospho-beta-D-ribosyl)glycinamide + 1.0 H+ # source: MetaCyc (queried 2.1.2.2)
5-aminoimidazole-ribonucleotide-biosyn-II/4_6.3.5.3_FGAMSYN-RXN : 1.0 H2O + 1.0 L-glutamine + 1.0 ATP + 1.0 N2-formyl-N1-(5-phospho-beta-D-
ribosyl)glycinamide --> 1.0 ADP + 1.0 2-(formamido)-N1-(5-phospho-beta-D-ribosyl)acetamidine + 1.0 H+ + 1.0 phosphate + 1.0 L-glutamate # source: MetaCyc, BRENDA, KEGG (queried
6.3.5.3)
5-aminoimidazole-ribonucleotide-biosyn-II/5_6.3.3.1_AIRS-RXN : 1.0 2-(formamido)-N1-(5-phospho-beta-D-ribosyl)acetamidine + 1.0 ATP --> 1.0
phosphate + 1.0 ADP + 1.0 5-amino-1-(5-phospho-beta-D-ribosyl)imidazole + 1.0 H+ # source: MetaCyc, BRENDA, KEGG (queried 6.3.3.1)
#####
#inosine-5'-phosphate biosynthesis
#E. coli class I 5.4.99.18 (PurE) without 6.3.4.18 (PurK) sufficient in vitro under high bicarbonate concentrations (Meyer et al., 1992).
#Overexpression of purE complements purK deletion in E. coli (Patrick et al., 2007).
#Several archaea with class I 5.4.99.18 (PurE) and missing purK found (Brown et al., 2011)
inosine-5'-phosphate-biosyn/1_manual_spontaneous_5.4.99.18_HD-5.4.99.18 : 1.0 hydrogen_carbonate + 1.0 5-amino-1-(5-phospho-beta-D-ribosyl)imidazole --> 1.0
H+ + 1.0 N5-carboxyaminoimidazole_ribonucleotide # metacyc
inosine-5'-phosphate-biosyn/2_5.4.99.18_RXN0-743 : 1.0 N5-carboxyaminoimidazole_ribonucleotide --> 1.0 5-amino-1-(5-phospho-D-
ribosyl)imidazole-4-carboxylate # source: MetaCyc, BRENDA, KEGG (queried 5.4.99.18)
inosine-5'-phosphate-biosyn/3_6.3.2.6_SAICARSYN-RXN : 1.0 5-amino-1-(5-phospho-D-ribosyl)imidazole-4-carboxylate + 1.0 L-aspartate + 1.0
ATP --> 1.0 5'-phosphoribosyl-4-(N-succinocarboxamide)-5-aminoimidazole + 1.0 ADP + 1.0 H+ + 1.0 phosphate # source: MetaCyc, BRENDA, KEGG (queried 6.3.2.6)
inosine-5'-phosphate-biosyn/4_4.3.2.2_AICARSYN-RXN : 1.0 5'-phosphoribosyl-4-(N-succinocarboxamide)-5-aminoimidazole <=> 1.0 5-amino-1-
(5-phospho-D-ribosyl)imidazole-4-carboxamide + 1.0 fumarate # source: MetaCyc, BRENDA, KEGG (queried 4.3.2.2)
inosine-5'-phosphate-biosyn/5_2.1.2.3_AICARTRANSFORM-RXN : 1.0 10-formyltetrahydrofolate + 1.0 5-amino-1-(5-phospho-D-ribosyl)imidazole-4-
carboxamide <=> 1.0 tetrahydropteroyl_tri-L-glutamate + 1.0 5-formamido-1-(5-phospho-D-ribosyl)-imidazole-4-carboxamide # source: MetaCyc (queried 2.1.2.3)
inosine-5'-phosphate-biosyn/6_moddir_3.5.4.10_2.1.2.3_IMPACYCLOHYDROLASE-RXN : 1.0 H2O + 1.0 IMP <=> 1.0 5-formamido-1-(5-phospho-D-ribosyl)-imidazole-4-
carboxamide # source: MetaCyc, BRENDA, KEGG (queried 3.5.4.10, 2.1.2.3)
#####
#tRNA
tRNA-charging_6.1.1.10_METHIONINE--TRNA-LIGASE-RXN : 1.0 ATP + 1.0 |MET-tRNAs| + 1.0 H+ + 1.0 L-methionine --> 1.0 |Charged-MET-tRNAs| + 1.0 diphosphate + 1.0
AMP # source: MetaCyc, KEGG (queried 6.1.1.10)
tRNA-charging_6.1.1.11_SERINE--TRNA-LIGASE-RXN : 1.0 H+ + 1.0 ATP + 1.0 |SER-tRNAs| + 1.0 L-serine --> 1.0 |Charged-SER-tRNAs| + 1.0 diphosphate + 1.0 AMP
# source: MetaCyc, KEGG (queried 6.1.1.11)
tRNA-charging_6.1.1.12_ASPARTATE--TRNA-LIGASE-RXN : 1.0 |ASP-tRNAs| + 1.0 H+ + 1.0 L-aspartate + 1.0 ATP --> 1.0 |Charged-ASP-tRNAs| + 1.0 diphosphate + 1.0
AMP # source: MetaCyc, KEGG (queried 6.1.1.12) // other EC numbers for this reaction: 6.1.1.23
tRNA-charging_6.1.1.14_GLYCINE--TRNA-LIGASE-RXN : 1.0 |GLY-tRNAs| + 1.0 H+ + 1.0 glycine + 1.0 ATP --> 1.0 |Charged-GLY-tRNAs| + 1.0 diphosphate + 1.0 AMP
# source: MetaCyc, KEGG (queried 6.1.1.14)
tRNA-charging_6.1.1.15_PROLINE--TRNA-LIGASE-RXN : 1.0 ATP + 1.0 L-proline + 1.0 |PRO-tRNAs| + 1.0 H+ --> 1.0 |Charged-PRO-tRNAs| + 1.0 diphosphate + 1.0
AMP # source: MetaCyc, KEGG (queried 6.1.1.15)
tRNA-charging_6.1.1.16_CYSTEINE--TRNA-LIGASE-RXN : 1.0 |CYS-tRNAs| + 1.0 H+ + 1.0 L-cysteine + 1.0 ATP --> 1.0 AMP + 1.0 |Charged-CYS-tRNAs| + 1.0
diphosphate # source: MetaCyc, KEGG (queried 6.1.1.16)

```

```

trna-charging_6.1.1.17_GLURS-RXN                                : 1.0 [GLT-tRNAs] + 1.0 H+ + 1.0 L-glutamate + 1.0 ATP --> 1.0 [Charged-GLT-tRNAs] + 1.0 AMP + 1.0
diphosphate # source: MetaCyc, KEGG (queried 6.1.1.17)
trna-charging_6.1.1.18 GLUTAMINE--TRNA-LIGASE-RXN            : 1.0 H+ + 1.0 L-glutamine + 1.0 ATP + 1.0 [GLN-tRNAs] --> 1.0 [Charged-GLN-tRNAs] + 1.0 diphosphate + 1.0
AMP # source: MetaCyc, KEGG (queried 6.1.1.18)
trna-charging_6.1.1.19 ARGININE--TRNA-LIGASE-RXN             : 1.0 L-arginine + 1.0 [ARG-tRNAs] + 1.0 H+ + 1.0 ATP --> 1.0 [Charged-ARG-tRNAs] + 1.0 diphosphate + 1.0
AMP # source: MetaCyc, KEGG (queried 6.1.1.19)
trna-charging_6.1.1.1 TYROSINE--TRNA-LIGASE-RXN             : 1.0 ATP + 1.0 [TYR-tRNAs] + 1.0 L-tyrosine + 1.0 H+ --> 1.0 [Charged-TYR-tRNAs] + 1.0 diphosphate + 1.0
AMP # source: MetaCyc, KEGG (queried 6.1.1.1)
trna-charging_6.1.1.20 PHENYLALANINE--TRNA-LIGASE-RXN        : 1.0 H+ + 1.0 L-phenylalanine + 1.0 ATP + 1.0 [PHE-tRNAs] --> 1.0 [Charged-PHE-tRNAs] + 1.0 AMP + 1.0
diphosphate # source: MetaCyc, KEGG (queried 6.1.1.20)
trna-charging_6.1.1.21 HISTIDINE--TRNA-LIGASE-RXN            : 1.0 [HIS-tRNAs] + 1.0 H+ + 1.0 L-histidine + 1.0 ATP --> 1.0 [Charged-HIS-tRNAs] + 1.0 diphosphate + 1.0
AMP # source: MetaCyc, KEGG (queried 6.1.1.21)
trna-charging_6.1.1.22 ASPARAGINE--TRNA-LIGASE-RXN           : 1.0 [ASN-tRNAs] + 1.0 H+ + 1.0 ATP + 1.0 L-asparagine --> 1.0 [Charged-ASN-tRNAs] + 1.0 diphosphate + 1.0
AMP # source: MetaCyc, KEGG (queried 6.1.1.22)
trna-charging_6.1.1.2 TRYPTOPHAN--TRNA-LIGASE-RXN           : 1.0 ATP + 1.0 [TRP-tRNAs] + 1.0 L-tryptophan + 1.0 H+ --> 1.0 [Charged-TRP-tRNAs] + 1.0 diphosphate + 1.0
AMP # source: MetaCyc, KEGG (queried 6.1.1.2)
trna-charging_6.1.1.3 THREONINE--TRNA-LIGASE-RXN            : 1.0 [THR-tRNAs] + 1.0 L-threonine + 1.0 H+ + 1.0 ATP --> 1.0 [Charged-THR-tRNAs] + 1.0 diphosphate + 1.0
AMP # source: MetaCyc, KEGG (queried 6.1.1.3)
trna-charging_6.1.1.4 LEUCINE--TRNA-LIGASE-RXN              : 1.0 ATP + 1.0 [LEU-tRNAs] + 1.0 H+ + 1.0 L-leucine --> 1.0 [Charged-LEU-tRNAs] + 1.0 diphosphate + 1.0
AMP # source: MetaCyc, KEGG (queried 6.1.1.4)
trna-charging_6.1.1.5 ISOLEUCINE--TRNA-LIGASE-RXN            : 1.0 ATP + 1.0 [ILE-tRNAs] + 1.0 H+ + 1.0 L-isoleucine --> 1.0 [Charged-ILE-tRNAs] + 1.0 AMP + 1.0
diphosphate # source: MetaCyc, KEGG (queried 6.1.1.5)
trna-charging_6.1.1.6 LYSINE--TRNA-LIGASE-RXN               : 1.0 ATP + 1.0 [LYS-tRNAs] + 1.0 H+ + 1.0 L-lysine --> 1.0 [Charged-LYS-tRNAs] + 1.0 diphosphate + 1.0 AMP
# source: MetaCyc, KEGG (queried 6.1.1.6)
trna-charging_6.1.1.7 ALANINE--TRNA-LIGASE-RXN              : 1.0 H+ + 1.0 [ALA-tRNAs] + 1.0 L-alanine + 1.0 ATP --> 1.0 AMP + 1.0 [Charged-ALA-tRNAs] + 1.0
diphosphate # source: MetaCyc, KEGG (queried 6.1.1.7)
trna-charging_6.1.1.9 VALINE--TRNA-LIGASE-RXN               : 1.0 H+ + 1.0 ATP + 1.0 [VAL-tRNAs] + 1.0 L-valine --> 1.0 [Charged-VAL-tRNAs] + 1.0 diphosphate + 1.0 AMP
# source: MetaCyc, KEGG (queried 6.1.1.9)
selenocysteine-biosynthesis_6.1.1.11_RXN0-2161              : 1.0 [SEC-tRNAs] + 1.0 L-serine + 1.0 H+ + 1.0 ATP --> 1.0 AMP + 1.0 [L-seryl-SEC-tRNAs] + 1.0 diphosphate
# source: MetaCyc, KEGG (queried 6.1.1.11)
#####
#NAD biosyn I/NADP
NAD-biosyn-I/1a_1.4.3.16_L-ASPARTATE-OXID-RXN                : 1.0 oxygen + 1.0 L-aspartate --> 1.0 2-iminosuccinate + 1.0 hydrogen_peroxide + 1.0 H+ # source:
MetaCyc, BRENDA, KEGG (queried 1.4.3.16)
NAD-biosyn-I/1b_1.4.3.16_RXN-9772                            : 1.0 L-aspartate + 1.0 fumarate --> 1.0 2-iminosuccinate + 1.0 H+ + 1.0 succinate # source: MetaCyc,
BRENDA (queried 1.4.3.16) // other EC numbers for this reaction: 1.5.99
NAD-biosyn-I/2_2.5.1.72_QUINOLINATE-SYNTHA-RXN              : 1.0 2-iminosuccinate + 1.0 glycerone_phosphate --> 1.0 quinolinate + 1.0 phosphate + 2.0 H2O # source:
MetaCyc, BRENDA, KEGG (queried 2.5.1.72)
NAD-biosyn-I/3_2.4.2.19_QUINOPRIBOTRANS-RXN                 : 1.0 diphosphate + 1.0 beta-nicotinate_D-ribonucleotide + 1.0 CO2 <-- 1.0 5-phospho-alpha-D-ribose-1-
diphosphate + 2.0 H+ + 1.0 quinolinate # source: MetaCyc, BRENDA, KEGG (queried 2.4.2.19)
NAD-biosyn-I/4_2.7.7.18_NICONUCADENYLYLTRAN-RXN            : 1.0 beta-nicotinate_D-ribonucleotide + 1.0 H+ + 1.0 ATP --> 1.0 nicotinate_adenine_dinucleotide + 1.0
diphosphate # source: MetaCyc, BRENDA, KEGG (queried 2.7.7.18) // other EC numbers for this reaction: 2.7.7.1
NAD-biosyn-I/5_6.3.1.5_NAD-SYNTH-NH3-RXN                    : 1.0 ATP + 1.0 ammonium + 1.0 nicotinate_adenine_dinucleotide --> 1.0 NAD+ + 1.0 AMP + 1.0 H+ + 1.0
diphosphate # source: MetaCyc, BRENDA, KEGG (queried 6.3.1.5) // other EC numbers for this reaction: 6.3.5.1
NADP-biosyn_2.7.1.23_NAD-KIN-RXN                            : 1.0 NAD+ + 1.0 ATP --> 1.0 ADP + 1.0 NADP+ + 1.0 H+ # source: MetaCyc, BRENDA, KEGG (queried 2.7.1.23)
#####
#NADH repair
NADH-repair_spontaneous_RXN-12753                           : 1.0 NADH + 1.0 H2O --> 1.0 (S)-NADHX # source: MetaCyc
NADH-repair_spontaneous_RXN-12754                           : 1.0 H2O + 1.0 NADH --> 1.0 (R)-NADHX # source: MetaCyc
NADH-repair_5.1.99.6_RXN-12752                              : 1.0 (R)-NADHX --> 1.0 (S)-NADHX # source: MetaCyc, BRENDA, KEGG (queried 5.1.99.6)
NADH-repair_4.2.1.136_RXN0-6727                             : 1.0 (S)-NADHX + 1.0 ADP --> 1.0 H+ + 1.0 phosphate + 1.0 NADH + 1.0 AMP # source: MetaCyc, BRENDA, KEGG
(queried 4.2.1.136)

NADPH-repair_manual_spontaneous_HD-(S)-NADPHX              : 1.0 NADPH + 1.0 H2O --> 1.0 (S)-NADPHX
NADPH-repair_manual_spontaneous_HD-(R)-NADPHX              : 1.0 H2O + 1.0 NADPH --> 1.0 (R)-NADPHX
NADPH-repair_5.1.99.6_RXN-13142                             : 1.0 (R)-NADPHX <=> 1.0 (S)-NADPHX # source: MetaCyc, BRENDA, KEGG (queried 5.1.99.6)
NADPH-repair_4.2.1.136_RXN-13141                             : 1.0 (S)-NADPHX + 1.0 ADP --> 1.0 NADPH + 1.0 AMP + 1.0 H+ + 1.0 phosphate # source: MetaCyc, BRENDA,
KEGG (queried 4.2.1.136)
#####
#nicotine transitions
nicotine-transitions-A/1_3.1.3.5_RXN-14227                  : 1.0 beta-nicotinate_D-ribonucleotide + 1.0 H2O --> 1.0 beta-D-ribosylnicotinate + 1.0 phosphate #
source: MetaCyc, KEGG (queried 3.1.3.5) // other EC numbers for this reaction: 3.1.3
nicotine-transitions-A/2_2.4.2.1_R02295                     : 1.0 phosphate + 1.0 beta-D-ribosylnicotinate <=> 1.0 alpha-D-ribose-1-phosphate + 1.0 nicotine #
source: KEGG (queried 2.4.2.1) // balanced // contains implicit reactant(s): H+, H2O

```

```

nicotine-transitions-B_3.6.1.9_BS165396 : 1.0 nicotinate_adenine_dinucleotide + 1.0 H2O --> 1.0 AMP + 1.0 beta-nicotinate_D-ribonucleotide #
source: BRENDA, KEGG (queried 3.6.1.9) // other EC numbers for this reaction: 3.6.1.22

nicotine-transitions-C/1_3.6.1.9_NADPYROPHOSPHAT-RXN : 1.0 H2O + 1.0 NAD+ --> 2.0 H+ + 1.0 beta-nicotinamide_D-ribonucleotide + 1.0 AMP # source: MetaCyc,
BRENDA, KEGG (queried 3.6.1.9) // other EC numbers for this reaction: 3.6.1.22
nicotine-transitions-C/2_3.1.3.5_3.1.3.2_RXN-5841 : 1.0 H2O + 1.0 beta-nicotinamide_D-ribonucleotide --> 1.0 1-(beta-D_ribofuranosyl)nicotinamide + 1.0
phosphate # source: MetaCyc, BRENDA, KEGG (queried 3.1.3.5, 3.1.3.2) // other EC numbers for this reaction: 3.1.3
nicotine-transitions-C/3_3.2.2.1_BS94861 : 1.0 1-(beta-D_ribofuranosyl)nicotinamide + 1.0 H2O --> 1.0 nicotinamide + 1.0 beta-D-ribofuranose #
source: BRENDA, KEGG (queried 3.2.2.1) // other EC numbers for this reaction: 3.2.2.3, 3.2.2.8
nicotine-transitions-C/4a_3.5.1.19_NICOTINAMID-RXN : 1.0 H2O + 1.0 nicotinamide --> 1.0 ammonium + 1.0 nicotinate # source: MetaCyc, BRENDA, KEGG (queried
3.5.1.19)
nicotine-transitions-C/4b_2.4.2.1_RXN0-7092 : 1.0 alpha-D-ribose-1-phosphate + 1.0 H+ + 1.0 nicotinamide <=> 1.0 phosphate + 1.0 1-(beta-
D_ribofuranosyl)nicotinamide # source: MetaCyc, BRENDA, KEGG (queried 2.4.2.1) // other EC numbers for this reaction: 2.4.2
nicotine-transitions-C/5_2.7.18_2.7.7.1-RXN : 1.0 H+ + 1.0 beta-nicotinamide_D-ribonucleotide + 1.0 ATP --> 1.0 diphosphate + 1.0 NAD+ # source:
MetaCyc, BRENDA, KEGG (queried 2.7.7.18) // other EC numbers for this reaction: 2.7.7.1
#####
#FAD biosyn I
flavin-biosyn-I/1_3.5.4.25_GTP-CYCLOHYDRO-II-RXN : 3.0 H2O + 1.0 GTP --> 1.0 diphosphate + 1.0 formate + 1.0 2,5-diamino-6-(5-phospho-D-
ribosylamino)pyrimidin-4(3H)-one + 2.0 H+ # source: MetaCyc, BRENDA, KEGG (queried 3.5.4.25)
flavin-biosyn-I/2_3.5.4.26_RIBOFLAVINSYNDEAM-RXN : 1.0 H2O + 1.0 H+ + 1.0 2,5-diamino-6-(5-phospho-D-ribosylamino)pyrimidin-4(3H)-one --> 1.0
ammonium + 1.0 5-amino-6-(5-phospho-D-ribosylamino)uracil # source: MetaCyc, BRENDA, KEGG (queried 3.5.4.26)
flavin-biosyn-I/3_1.1.1.193_RIBOFLAVINSYNREDUC-RXN : 1.0 NADP+ + 1.0 5-amino-6-(5-phospho-D-ribitylamino)uracil <-- 1.0 H+ + 1.0 5-amino-6-(5-
phospho-D-ribosylamino)uracil + 1.0 NADPH # source: MetaCyc, BRENDA, KEGG (queried 1.1.1.193)
flavin-biosyn-I/4_3.1.3.-RIBOPHOSPHAT-RXN : 1.0 H2O + 1.0 5-amino-6-(5-phospho-D-ribitylamino)uracil --> 1.0 5-amino-6-(D-
ribitylamino)uracil + 1.0 phosphate # source: MetaCyc, KEGG (queried 3.1.3.-) // other EC numbers for this reaction: 3.1.3
flavin-biosyn-I/5_4.1.99.12_DIOHBUTANONEPSYN-RXN : 1.0 D-ribulose_5-phosphate --> 1.0 H+ + 1.0 1-deoxy-L-glycero-tetrolose_4-phosphate + 1.0
formate # source: MetaCyc, BRENDA, KEGG (queried 4.1.99.12)
flavin-biosyn-I/6_2.5.1.78_LUMAZINESYN-RXN : 1.0 1-deoxy-L-glycero-tetrolose_4-phosphate + 1.0 5-amino-6-(D-ribitylamino)uracil --> 1.0
H+ + 1.0 phosphate + 1.0 6,7-dimethyl-8-(1-D-ribityl)lumazine + 2.0 H2O # source: MetaCyc, BRENDA, KEGG (queried 2.5.1.78)
flavin-biosyn-I/7_2.5.1.9_RIBOFLAVIN-SYN-RXN : 1.0 H+ + 2.0 6,7-dimethyl-8-(1-D-ribityl)lumazine --> 1.0 5-amino-6-(D-ribitylamino)uracil
+ 1.0 riboflavin # source: MetaCyc, BRENDA, KEGG (queried 2.5.1.9)
flavin-biosyn-I/8_2.7.1.26_RIBOFLAVINKIN-RXN : 1.0 riboflavin + 1.0 ATP --> 1.0 FMN + 1.0 ADP + 1.0 H+ # source: MetaCyc, BRENDA, KEGG
(queried 2.7.1.26)
flavin-biosyn-I/9_2.7.7.2_FADSYN-RXN : 1.0 H+ + 1.0 FMN + 1.0 ATP --> 1.0 FAD + 1.0 diphosphate # source: MetaCyc, BRENDA, KEGG
(queried 2.7.7.2)
#####
#phosphopantothenate biosynthesis I
phosphopantothenate-biosyn-I/1_2.1.2.11_3-CH3-2-OXOBUTANOATE-OH-CH3-XFER-RXN : 1.0 5,10-methylene-tetrahydrofolate + 1.0 H2O + 1.0 3-methyl-2-oxobutanoate <=> 1.0 2-
dehydropantoate + 1.0 tetrahydropteroyl_tri-L-glutamamate # source: MetaCyc (queried 2.1.2.11)
phosphopantothenate-biosyn-I/2_1.1.1.169_2-DEHYDROPANTOATE-REDUCT-RXN : 1.0 (R)-pantoate + 1.0 NADP+ <-- 1.0 NADPH + 1.0 2-dehydropantoate + 1.0 H+ # source:
MetaCyc, BRENDA, KEGG (queried 1.1.1.169)
phosphopantothenate-biosyn-I/3_6.3.2.1_PANTOATE-BETA-ALANINE-LIG-RXN : 1.0 (R)-pantoate + 1.0 beta-alanine + 1.0 ATP --> 1.0 diphosphate + 1.0 (R)-pantothenate +
1.0 AMP + 1.0 H+ # source: MetaCyc, BRENDA, KEGG (queried 6.3.2.1)
phosphopantothenate-biosyn-I/4_2.7.1.33_PANTOTHENATE-KIN-RXN : 1.0 (R)-pantothenate + 1.0 ATP --> 1.0 (R)-4'-phosphopantothenate + 1.0 H+ + 1.0 ADP #
source: MetaCyc, BRENDA, KEGG (queried 2.7.1.33)
#####
#coenzyme A biosyn
coenzyme-A-biosyn/1_6.3.2.5_P-PANTOCYSLIG-RXN : 1.0 L-cysteine + 1.0 CTP + 1.0 (R)-4'-phosphopantothenate --> 1.0 diphosphate + 1.0 CMP +
1.0 R-4'-phosphopantothenoyl-L-cysteine + 1.0 H+ # source: MetaCyc, BRENDA, KEGG (queried 6.3.2.5)
coenzyme-A-biosyn/2_4.1.1.36_P-PANTOCYSDECARB-RXN : 1.0 R-4'-phosphopantothenoyl-L-cysteine + 1.0 H+ --> 1.0 CO2 + 1.0 4'-phosphopantetheine #
source: MetaCyc, BRENDA, KEGG (queried 4.1.1.36)
coenzyme-A-biosyn/3_2.7.7.3_PANTEPADENYLYLTRAN-RXN : 1.0 H+ + 1.0 4'-phosphopantetheine + 1.0 ATP --> 1.0 diphosphate + 1.0 3'-dephospho-CoA #
source: MetaCyc, BRENDA, KEGG (queried 2.7.7.3)
coenzyme-A-biosyn/4_2.7.1.24_DEPHOSPHOCOAKIN-RXN : 1.0 ATP + 1.0 3'-dephospho-CoA --> 1.0 ADP + 1.0 coenzyme_A + 1.0 H+ # source: MetaCyc,
BRENDA, KEGG (queried 2.7.1.24)
#####
#4-aminobenzoate biosynthesis
4-aminobenzoate-biosyn/1_2.6.1.85_PABASYN-RXN : 1.0 chorismate + 1.0 L-glutamine <=> 1.0 4-amino-4-deoxychorismate + 1.0 L-glutamate #
source: MetaCyc, BRENDA, KEGG (queried 2.6.1.85)
4-aminobenzoate-biosyn/2_4.1.3.38_ADCLY-RXN : 1.0 4-amino-4-deoxychorismate <=> 1.0 4-aminobenzoate + 1.0 pyruvate + 1.0 H+ # source:
MetaCyc, BRENDA, KEGG (queried 4.1.3.38)
#####
#6-hydroxymethyl-dihydropterin diphosphate biosynthesis I

```

```

6-hydroxymethyl-dihydropterin-PP-biosyn-I/1_3.5.4.16_R00428      : 1.0 GTP + 1.0 H2O --> 1.0 Formamidopyrimidine_nucleoside_triphosphate # source: KEGG
(queried 3.5.4.16)
6-hydroxymethyl-dihydropterin-PP-biosyn-I/2_3.5.4.16_R05046      : 1.0 Formamidopyrimidine_nucleoside_triphosphate + 1.0 H2O --> 1.0 formate + 1.0 N-
(2,5-diamino-6-oxo-1,6-dihydropyrimidin-4-yl)-beta-D-ribofuranosylamine_5'-triphosphate # source: KEGG (queried 3.5.4.16)
6-hydroxymethyl-dihydropterin-PP-biosyn-I/3_3.5.4.16_R05048      : 1.0 N-(2,5-diamino-6-oxo-1,6-dihydropyrimidin-4-yl)-beta-D-ribofuranosylamine_5'-
triphosphate <=> 1.0 2,5-Diamino-6-(5'-triphosphoryl-3,4'-trihydroxy-2'-oxopentyl)-amino-4-oxopyrimidine # source: KEGG (queried 3.5.4.16)
6-hydroxymethyl-dihydropterin-PP-biosyn-I/4_moddir_3.5.4.16_R04639 : 1.0 7,8-dihydroneopterin_3'-triphosphate + 1.0 H2O <=> 1.0 2,5-Diamino-6-(5'-
triphosphoryl-3,4'-trihydroxy-2'-oxopentyl)-amino-4-oxopyrimidine # source: KEGG (queried 3.5.4.16)
6-hydroxymethyl-dihydropterin-PP-biosyn-I/5_3.6.1.67_H2NEOPTERINP3PYROPHOSPHOHYDRO-RXN : 1.0 H2O + 1.0 7,8-dihydroneopterin_3'-triphosphate --> 1.0 diphosphate + 1.0 7,8-
dihydroneopterin_3'-phosphate + 1.0 H+ # source: MetaCyc, BRENDA, KEGG (queried 3.6.1.67) // other EC numbers for this reaction: 3.6.1.B15
6-hydroxymethyl-dihydropterin-PP-biosyn-I/6_3.6.1.-_DIHYDRONEOPTERIN-MONO-P-DEPHOS-RXN : 1.0 H2O + 1.0 7,8-dihydroneopterin_3'-phosphate --> 1.0 7,8-dihydroneopterin + 1.0
phosphate # source: MetaCyc, KEGG (queried 3.6.1.-) // other EC numbers for this reaction: 3.6.1
6-hydroxymethyl-dihydropterin-PP-biosyn-I/7_4.1.2.25_H2NEOPTERINALDOL-RXN : 1.0 7,8-dihydroneopterin <=> 1.0 glycolaldehyde + 1.0 6-hydroxymethyl-7,8-
dihydropterin # source: MetaCyc, BRENDA, KEGG (queried 4.1.2.25)
6-hydroxymethyl-dihydropterin-PP-biosyn-I/8_2.7.6.3_H2PTERIDINEPYROPHOSPHOKIN-RXN : 1.0 6-hydroxymethyl-7,8-dihydropterin + 1.0 ATP --> 1.0 6-hydroxymethyl-7,8-
dihydropterin_diphosphate + 1.0 AMP + 1.0 H+ # source: MetaCyc, BRENDA, KEGG (queried 2.7.6.3)
#####
#THF biosyn
tetrahydrofolate-biosynthesis_2.5.1.15_H2PTEROATESYNTH-RXN : 1.0 4-aminobenzoate + 1.0 6-hydroxymethyl-7,8-dihydropterin_diphosphate --> 1.0 7,8-
dihydropteroate + 1.0 diphosphate # source: MetaCyc, BRENDA, KEGG (queried 2.5.1.15)
tetrahydrofolate-biosynthesis_6.3.2.17_DIHYDROFOLATESYNTH-RXN : 1.0 L-glutamate + 1.0 ATP + 1.0 7,8-dihydropteroate --> 1.0 ADP + 1.0 H+ + 1.0
phosphate + 1.0 7,8-dihydrofolate_monoglutamate # source: MetaCyc, BRENDA, KEGG (queried 6.3.2.17) // other EC numbers for this reaction: 6.3.2.12
tetrahydrofolate-biosyn/3_manual_1.5.1.3_HD-1.5.1.3 : 1.0 NADP+ + 1.0 tetrahydropteroyl_mono-L-glutamate <- 1.0 H+ + 1.0 NADPH + 1.0 7,8-
dihydrofolate_monoglutamate
#primary triglutamyl in Clostridium aciduri (Curthoys et al. 1972)
tetrahydrofolate-biosyn/4_manual_6.3.2.17_HD-6.3.2.17 : 1.0 tetrahydropteroyl_mono-L-glutamate + 2.0 L-glutamate + 2.0 ATP --> 1.0
tetrahydropteroyl_tri-L-glutamate + 2.0 ADP + 2.0 phosphate
#####
#folate transformations
folate-transformations/1_3.5.4.9_2.1.2.10_RXN-6321 : 1.0 5,10-methenyltetrahydrofolate + 1.0 H2O --> 1.0 H+ + 1.0 [N5-Formyl-THF-Glu-N] #
source: MetaCyc, BRENDA, KEGG (queried 3.5.4.9, 2.1.2.10)
folate-transformations/2_6.3.3.2_5-FORMYL-THF-CYCLO-LIGASE-RXN : 1.0 ATP + 1.0 [N5-Formyl-THF-Glu-N] --> 1.0 ADP + 1.0 phosphate + 1.0 5,10-
methenyltetrahydrofolate # source: MetaCyc, BRENDA, KEGG (queried 6.3.3.2)
#####
#methylerythr path
methylerythritol-phosphate-pathway/1_2.2.1.7_DXS-RXN : 1.0 pyruvate + 1.0 H+ + 1.0 D-glyceraldehyde_3-phosphate --> 1.0 CO2 + 1.0 1-deoxy-D-
xylulose_5-phosphate # source: MetaCyc, BRENDA, KEGG (queried 2.2.1.7)
methylerythritol-phosphate-pathway/2_1.1.1.267_DXPREDISOM-RXN : 1.0 2-C-methyl-D-erythritol_4-phosphate + 1.0 NADP+ <=> 1.0 NADPH + 1.0 1-deoxy-D-
xylulose_5-phosphate + 1.0 H+ # source: MetaCyc, BRENDA, KEGG (queried 1.1.1.267)
methylerythritol-phosphate-pathway/3_2.7.7.60_2.7.7.60-RXN : 1.0 H+ + 1.0 2-C-methyl-D-erythritol_4-phosphate + 1.0 CTP --> 1.0 diphosphate + 1.0
4-(cytidine_5'-diphospho)-2-C-methyl-D-erythritol # source: MetaCyc, BRENDA, KEGG (queried 2.7.7.60)
methylerythritol-phosphate-pathway/4_2.7.1.148_2.7.1.148-RXN : 1.0 ATP + 1.0 4-(cytidine_5'-diphospho)-2-C-methyl-D-erythritol --> 1.0 ADP + 1.0 2-
phospho-4-(cytidine_5'-diphospho)-2-C-methyl-D-erythritol + 1.0 H+ # source: MetaCyc, BRENDA, KEGG (queried 2.7.1.148)
methylerythritol-phosphate-pathway/5_4.6.1.12_RXN0-302 : 1.0 2-phospho-4-(cytidine_5'-diphospho)-2-C-methyl-D-erythritol --> 1.0 2-C-methyl-D-
erythritol-2,4-cyclodiphosphate + 1.0 CMP # source: MetaCyc, BRENDA, KEGG (queried 4.6.1.12)
methylerythritol-phosphate-pathway/6_1.17.7.1_RXN0-882 : 2.0 [oxidized-ferredoxins] + 1.0 H2O + 1.0 1-hydroxy-2-methyl-2-(E)-butenyl_4-
diphosphate <- 2.0 [Reduced-ferredoxins] + 1.0 H+ + 1.0 2-C-methyl-D-erythritol-2,4-cyclodiphosphate # source: MetaCyc, KEGG (queried 1.17.7.1)
methylerythritol-phosphate-pathway/7a_1.17.7.4_ISPH2-RXN : 1.0 isopentenyl_diphosphate + 2.0 [oxidized-ferredoxins] + 1.0 H2O <- 2.0 H+ + 1.0
1-hydroxy-2-methyl-2-(E)-butenyl_4-diphosphate + 2.0 [Reduced-ferredoxins] # source: MetaCyc, KEGG (queried 1.17.7.4) // other EC numbers for this reaction: 1.17.7.c
methylerythritol-phosphate-pathway/7b_1.17.7.4_RXN0-884 : 2.0 [oxidized-ferredoxins] + 1.0 H2O + 1.0 dimethylallyl_diphosphate <- 1.0 1-
hydroxy-2-methyl-2-(E)-butenyl_4-diphosphate + 2.0 [Reduced-ferredoxins] + 2.0 H+ # source: MetaCyc, KEGG (queried 1.17.7.4) // other EC numbers for this reaction: 1.17.7.c
#####
#farnesyl PP biosyn
farnesyl-PP-biosyn/1_2.5.1.1_GPPSYN-RXN : 1.0 dimethylallyl_diphosphate + 1.0 isopentenyl_diphosphate <=> 1.0
geranyl_diphosphate + 1.0 diphosphate # source: MetaCyc, BRENDA, KEGG (queried 2.5.1.1)
farnesyl-PP-biosyn/2a_2.5.1.10_FPPSYN-RXN : 1.0 geranyl_diphosphate + 1.0 isopentenyl_diphosphate <=> 1.0 (2E,6E)-
farnesyl_diphosphate + 1.0 diphosphate # source: MetaCyc, BRENDA, KEGG (queried 2.5.1.10)
farnesyl-PP-biosyn/2b_2.5.1.10_BS421953 : 1.0 dimethylallyl_diphosphate + 1.0 geranyl_diphosphate <=> 1.0 diphosphate + 1.0
(2E,6E)-farnesyl_diphosphate # source: BRENDA (queried 2.5.1.10)
#####
#undecaprenyl PP biosyn
undecaprenyl-PP-biosyn_2.5.1.31_RXN-8999 : 1.0 (2E,6E)-farnesyl_diphosphate + 8.0 isopentenyl_diphosphate --> 8.0 diphosphate +
1.0 di-trans,octa-cis-undecaprenyl_diphosphate # source: MetaCyc, BRENDA, KEGG (queried 2.5.1.31)
#####

```

```

#4-amino-2-methyl-5-diphosphomethylpyrimidine biosynthesis
4-amino-2-methyl-5-diphosphomethylpyrimidine-biosyn/1_4.1.99.17_PYRIMSYN1-RXN      : 1.0 S-adenosyl-L-methionine + 1.0 5-amino-1-(5-phospho-beta-D-ribose)imidazole -->
1.0 4-amino-2-methyl-5-phosphomethylpyrimidine + 3.0 H+ + 1.0 L-methionine + 1.0 carbon_monoxide + 1.0 formate + 1.0 5'-deoxyadenosine # source: MetaCyc, BRENDA, KEGG (queried
4.1.99.17)
4-amino-2-methyl-5-diphosphomethylpyrimidine-biosyn/2_2.7.4.7_PYRIMSYN3-RXN      : 1.0 4-amino-2-methyl-5-phosphomethylpyrimidine + 1.0 ATP --> 1.0 ADP + 1.0 4-amino-2-
methyl-5-diphosphomethylpyrimidine # source: MetaCyc, BRENDA, KEGG (queried 2.7.4.7)
#####
#5'-deoxyadenosine degradation
5'-deoxyadenosine-degr_3.2.2.16_3.2.2.1_3.2.2.9_RXN0-6550                          : 1.0 H2O + 1.0 5'-deoxyadenosine --> 1.0 adenine + 1.0 5-deoxy-D-ribose # source:
MetaCyc, BRENDA (queried 3.2.2.16, 3.2.2.1, 3.2.2.9)
#####
#molybdenum cofactor biosynthesis
molybdenum-cofactor-biosynthesis/1_2.8.1.7_RXN0-308                               : 1.0 [Cysteine-Desulfurase-L-cysteine] + 1.0 L-cysteine --> 1.0 L-alanine + 1.0 [L-
Cysteine-Desulfurase-persulfide] # source: MetaCyc (queried 2.8.1.7)
molybdenum-cofactor-biosynthesis/2_2.7.7.80_RXN-11361                             : 1.0 ATP + 1.0 [MPT-Synthases] + 1.0 H+ --> 1.0 diphosphate + 1.0 [Carboxyadenylated-
MPT-synthases] # source: MetaCyc (queried 2.7.7.80)
molybdenum-cofactor-biosynthesis/3_mod_2.8.1.11_RXN-12473                         : 2.0 [Reduced-ferredoxins] + 1.0 H+ + 1.0 [Carboxyadenylated-MPT-synthases] + 1.0 [L-
Cysteine-Desulfurase-persulfide] --> 1.0 [Cysteine-Desulfurase-L-cysteine] + 1.0 AMP + 1.0 [Thiocarboxylated-MPT-synthases] + 2.0 [Oxidized-ferredoxins] # source: MetaCyc
(queried 2.8.1.11)
molybdenum-cofactor-biosynthesis/4_4.1.99.18_RXN-8340                             : 1.0 GTP --> 1.0 cyclic_pyranopterin_phosphate + 1.0 diphosphate # source: MetaCyc,
BRENDA, KEGG (queried 4.1.99.18)
molybdenum-cofactor-biosynthesis/5_2.8.1.12_RXN-8342                               : 1.0 cyclic_pyranopterin_phosphate + 2.0 [Thiocarboxylated-MPT-synthases] + 1.0 H2O
--> 1.0 molybdopterin + 2.0 [MPT-Synthases] + 4.0 H+ # source: MetaCyc (queried 2.8.1.12)
molybdenum-cofactor-biosynthesis/6_2.7.7.75_RXN-8344                             : 1.0 ATP + 1.0 H+ + 1.0 molybdopterin --> 1.0 molybdopterin_adenine_dinucleotide + 1.0
diphosphate # source: MetaCyc, BRENDA, KEGG (queried 2.7.7.75)
molybdenum-cofactor-biosynthesis/7_2.10.1.1_RXN-8348                             : 1.0 molybdopterin_adenine_dinucleotide + 1.0 molybdate + 1.0 H+ --> 1.0 MoO2-
molybdopterin_cofactor + 1.0 AMP + 1.0 H2O # source: MetaCyc, BRENDA, KEGG (queried 2.10.1.1)
#####
#thiazole biosynthesis
thiazole-biosynthesis/1_2.8.1.7_RXN-9787                                           : 1.0 [Sulfur-Carrier-Proteins-ThiI] + 1.0 L-cysteine <=> 1.0 L-alanine + 1.0 [
Sulfurylated-ThiI] # source: MetaCyc (queried 2.8.1.7)
thiazole-biosynthesis/2_2.7.7.73_RXN-9789                                         : 1.0 H+ + 1.0 [Thi-S] + 1.0 ATP --> 1.0 [Adenylated-ThiS-Proteins] + 1.0 diphosphate
# source: MetaCyc, BRENDA (queried 2.7.7.73)
thiazole-biosynthesis/3_2.8.1.-_RXN-9788                                           : 2.0 [Reduced-ferredoxins] + 1.0 [Adenylated-ThiS-Proteins] + 1.0 [Sulfurylated-ThiI]
--> 1.0 [Thiocarboxyadenylated-ThiS-Proteins] + 1.0 [Sulfur-Carrier-Proteins-ThiI] + 2.0 [Oxidized-ferredoxins] + 1.0 AMP # source: MetaCyc (queried 2.8.1.-) // other EC numbers
for this reaction: 2.8.1
thiazole-biosynthesis/p4_4.1.99.19_RXN-11319                                       : 1.0 S-adenosyl-L-methionine + 1.0 NADPH + 1.0 L-tyrosine --> 1.0 5'-deoxyadenosine +
1.0 H+ + 1.0 NADP+ + 1.0 L-methionine + 1.0 2-iminoacetate + 1.0 4-methylphenol # source: MetaCyc, BRENDA (queried 4.1.99.19)
thiazole-biosynthesis/4_2.8.1.10_THIAZOLSYN2-RXN                                  : 1.0 1-deoxy-D-xylulose_5-phosphate + 1.0 [Thiocarboxyadenylated-ThiS-Proteins] + 1.0
2-iminoacetate --> 2.0 H2O + 1.0 [Thi-S] + 1.0 2-[(2R,5Z)-2-carboxy-4-methylthiazol-5(2H)-ylidene]ethyl_phosphate # source: MetaCyc (queried 2.8.1.10)
#####
#thiamin diphosphate biosynthesis III (Staphylococcus)
thiamin-diphosphate-biosyn-III/1_2.5.1.3_RXN-12611                                : 2.0 H+ + 1.0 2-[(2R,5Z)-2-carboxy-4-methylthiazol-5(2H)-ylidene]ethyl_phosphate + 1.0
4-amino-2-methyl-5-diphosphomethylpyrimidine --> 1.0 thiamine_phosphate + 1.0 diphosphate + 1.0 CO2 # source: MetaCyc, BRENDA (queried 2.5.1.3)
thiamin-diphosphate-biosyn-III/2_3.1.3.2_RXNQT-4191                                : 1.0 thiamine_phosphate + 1.0 H2O --> 1.0 phosphate + 1.0 thiamine # source: MetaCyc,
BRENDA, KEGG (queried 3.1.3.2) // other EC numbers for this reaction: 3.1.3, 3.1.3.w
thiamin-diphosphate-biosyn-III/3_2.7.6.2_THIAMIN-PYROPHOSPHOKINASE-RXN           : 1.0 thiamine + 1.0 ATP --> 1.0 H+ + 1.0 AMP + 1.0 thiamine_diphosphate # source:
MetaCyc, BRENDA, KEGG (queried 2.7.6.2)
#####
#thiamin salvage
thiamin-salvage/1_3.5.99.2_THIAMINASE-RXN                                          : 1.0 thiamine + 1.0 H2O --> 1.0 H+ + 1.0 4-amino-2-methyl-5-pyrimidinmethanol + 1.0
5-(2-hydroxyethyl)-4-methylthiazole # source: MetaCyc, BRENDA, KEGG (queried 3.5.99.2)
thiamin-salvage/2_2.7.1.50_THIAZOLSYN3-RXN                                        : 1.0 ATP + 1.0 5-(2-hydroxyethyl)-4-methylthiazole --> 1.0 H+ + 1.0 ADP + 1.0 4-
methyl-5-(2-phosphonooxyethyl)thiazole # source: MetaCyc, BRENDA, KEGG (queried 2.7.1.50)
thiamin-salvage/p3_2.7.1.49_OHMETPYRKIN-RXN                                        : 1.0 ATP + 1.0 4-amino-2-methyl-5-pyrimidinmethanol --> 1.0 ADP + 1.0 4-amino-2-
methyl-5-phosphomethylpyrimidine + 1.0 H+ # source: MetaCyc, BRENDA, KEGG (queried 2.7.1.49)
thiamin-salvage/4_2.5.1.3_THI-P-SYN-RXN                                           : 1.0 4-methyl-5-(2-phosphonooxyethyl)thiazole + 1.0 4-amino-2-methyl-5-
diphosphomethylpyrimidine + 1.0 H+ --> 1.0 diphosphate + 1.0 thiamine_phosphate # source: MetaCyc, BRENDA, KEGG (queried 2.5.1.3)
#####
#tetrapyrrole biosynthesis I
tetrapyrrole-biosynthesis/1_1.2.1.70_GLUTRNAREDUCT-RXN                             : 1.0 [GLT-tRNAs] + 1.0 NADP+ + 1.0 (S)-4-amino-5-oxopentanoate <-- 1.0 [Charged-GLT-
tRNAs] + 1.0 NADPH # source: MetaCyc (queried 1.2.1.70)
tetrapyrrole-biosynthesis/2_5.4.3.8_GSAAMINOTRANS-RXN                             : 1.0 (S)-4-amino-5-oxopentanoate --> 1.0 5-aminolevulinate # source: MetaCyc, BRENDA,
KEGG (queried 5.4.3.8)

```



```

tetrapyrrole-biosynthesis/3_4.2.1.24_PORPHOBILSYNTH-RXN          : 2.0 5-aminolevulinic acid --> 1.0 H+ + 1.0 porphobilinogen + 2.0 H2O # source: MetaCyc,
BRENDA, KEGG (queried 4.2.1.24)
tetrapyrrole-biosynthesis/4_2.5.1.61_OHMETHYLBILANESYN-RXN      : 4.0 porphobilinogen + 1.0 H2O --> 4.0 ammonium + 1.0 preuroporphyrinogen # source:
MetaCyc, BRENDA, KEGG (queried 2.5.1.61)
tetrapyrrole-biosynthesis/5_4.2.1.75_UROGENIISYN-RXN           : 1.0 preuroporphyrinogen --> 1.0 H2O + 1.0 uroporphyrinogen-III # source: MetaCyc,
BRENDA, KEGG (queried 4.2.1.75)
#####
#cobyrinate biosyn I
cobyrinate-biosyn-I/1_2.1.1.107_UROPORIIIMETHYLTRANSA-RXN      : 1.0 uroporphyrinogen-III + 1.0 S-adenosyl-L-methionine --> 1.0 precorrin-1 + 1.0 S-adenosyl-L-
homocysteine + 1.0 H+ # source: MetaCyc, BRENDA, KEGG (queried 2.1.1.107)
cobyrinate-biosyn-I/2_2.1.1.107_RXN-8675                       : 1.0 S-adenosyl-L-methionine + 1.0 precorrin-1 --> 1.0 S-adenosyl-L-homocysteine + 1.0 precorrin-2 #
source: MetaCyc, BRENDA, KEGG (queried 2.1.1.107)
cobyrinate-biosyn-I/3_1.3.1.76_DIMETHUROPORDEHYDROG-RXN       : 1.0 NAD+ + 1.0 precorrin-2 <=> 2.0 H+ + 1.0 NADH + 1.0 sirohydrochlorin # source: MetaCyc, BRENDA, KEGG
(queried 1.3.1.76)
cobyrinate-biosyn-I/4_4.99.1.3_4.99.1.3-RXN                   : 1.0 sirohydrochlorin + 1.0 Co2+ --> 1.0 cobalt-sirohydrochlorin + 2.0 H+ # source: MetaCyc, BRENDA, KEGG
(queried 4.99.1.3)
cobyrinate-biosyn-I/5_2.1.1.151_2.1.1.151-RXN                 : 1.0 cobalt-sirohydrochlorin + 1.0 S-adenosyl-L-methionine --> 1.0 cobalt-factor_III + 1.0 S-adenosyl-L-
homocysteine + 1.0 H+ # source: MetaCyc, BRENDA, KEGG (queried 2.1.1.151)
#Electron donor may be thioredoxin (Moore et al. 2013)
cobyrinate-biosyn-I/6_mod_2.1.1.272_RXN-14314                 : 1.0 |Red-Thioredoxin| + 1.0 cobalt-factor_III + 1.0 S-adenosyl-L-methionine --> 1.0 cobalt-precorrin-4 +
1.0 |Ox-Thioredoxin| + 1.0 S-adenosyl-L-homocysteine # source: MetaCyc, BRENDA (queried 2.1.1.272)
cobyrinate-biosyn-I/7_2.1.1.271_RXN-8762                     : 1.0 cobalt-precorrin-4 + 1.0 S-adenosyl-L-methionine --> 1.0 S-adenosyl-L-homocysteine + 1.0 cobalt-
precorrin-5A + 1.0 H+ # source: MetaCyc, BRENDA, KEGG (queried 2.1.1.271)
cobyrinate-biosyn-I/8_3.7.1.12_RXN-8763                       : 1.0 cobalt-precorrin-5A + 1.0 H2O --> 1.0 acetaldehyde + 1.0 cobalt-precorrin-5B + 1.0 H+ # source:
MetaCyc, BRENDA, KEGG (queried 3.7.1.12)
cobyrinate-biosyn-I/9_2.1.1.195_RXN-8764                     : 1.0 cobalt-precorrin-5B + 1.0 S-adenosyl-L-methionine --> 1.0 S-adenosyl-L-homocysteine + 1.0 cobalt-
precorrin-6A # source: MetaCyc, BRENDA, KEGG (queried 2.1.1.195)
cobyrinate-biosyn-I/10_1.3.1.106_RXN-8765                     : 1.0 cobalt-precorrin-6B + 1.0 NAD+ <-- 1.0 cobalt-precorrin-6A + 1.0 NADH # source: MetaCyc, BRENDA,
KEGG (queried 1.3.1.106)
cobyrinate-biosyn-I/11_2.1.1.196_RXN-8766                     : 1.0 cobalt-precorrin-6B + 1.0 S-adenosyl-L-methionine + 1.0 H+ --> 1.0 cobalt-precorrin-7 + 1.0 CO2 + 1.0
S-adenosyl-L-homocysteine # source: MetaCyc, BRENDA, KEGG (queried 2.1.1.196)
cobyrinate-biosyn-I/12_2.1.1.289_RXN-8767                     : 1.0 S-adenosyl-L-methionine + 1.0 cobalt-precorrin-7 --> 1.0 S-adenosyl-L-homocysteine + 1.0 cobalt-
precorrin-8 # source: MetaCyc, BRENDA, KEGG (queried 2.1.1.289)
cobyrinate-biosyn-I/13_5.4.99.60_RXN-8768                     : 1.0 cobalt-precorrin-8 --> 1.0 H+ + 1.0 cobyrinate # source: MetaCyc, BRENDA, KEGG (queried 5.4.99.60)
cobyrinate-biosyn-I/14_6.3.5.11_RXN-14256                     : 1.0 H2O + 1.0 L-glutamine + 1.0 cobyrinate + 1.0 ATP --> 1.0 cob(II)yrinate_c-monoamide + 1.0 ADP + 1.0
H+ + 1.0 L-glutamate + 1.0 phosphate # source: MetaCyc, BRENDA, KEGG (queried 6.3.5.11)
cobyrinate-biosyn-I/15_6.3.5.11_RXN-14257                     : 1.0 L-glutamine + 1.0 cob(II)yrinate_c-monoamide + 1.0 ATP + 1.0 H2O --> 1.0 L-glutamate + 1.0
cob(II)yrinate_a,c-diamide + 1.0 ADP + 1.0 H+ + 1.0 phosphate # source: MetaCyc, BRENDA, KEGG (queried 6.3.5.11)
#####
#5,6-dimethylbenzimidazole biosyn II
#4.1.99.M1: Ferredoxins as a guess
5,6-dimethylbenzimidazole-biosyn-II/1_4.1.99.M1_RXN-17122    : 1.0 5-amino-1-(5-phospho-beta-D-ribose)imidazole + 1.0 S-adenosyl-L-methionine + 2.0 |
Reduced-ferredoxins| --> 1.0 5-hydroxy-benzimidazole + 1.0 ammonium + 1.0 formate + 1.0 5'-deoxyadenosine + 1.0 L-methionine + 1.0 phosphate + 2.0 |Oxidized-ferredoxins|
5,6-dimethylbenzimidazole-biosyn-II/2_2.1.1.M9_RXN-17123     : 1.0 5-hydroxy-benzimidazole + 1.0 S-adenosyl-L-methionine --> 1.0 5-methoxy-
benzimidazole + 1.0 S-adenosyl-L-homocysteine + 1.0 H+
5,6-dimethylbenzimidazole-biosyn-II/3_2.1.1.M10_RXN-17124    : 1.0 5-methoxy-benzimidazole + 1.0 S-adenosyl-L-methionine --> 1.0 5-methoxy-6-
methylbenzimidazole + 1.0 S-adenosyl-L-homocysteine + 1.0 H+
#mechanism completely unclear
5,6-dimethylbenzimidazole-biosyn-II/4_unknown_RXN-17125     : 1.0 5-methoxy-6-methylbenzimidazole --> 5,6-dimethylbenzimidazole
#####
#adenosylcobalamin biosyn I
#1.16.8.1: NADH as a guess
adenosylcobalamin-biosynthesis-I/1_mod_1.16.8.1_R343-RXN     : 2.0 H+ + 1.0 NAD+ + 2.0 cob(I)yrinate_a,c-diamide <-- 2.0 cob(II)yrinate_a,c-diamide +
1.0 NADH # source: MetaCyc, BRENDA, KEGG (queried 1.16.8.1)
adenosylcobalamin-biosynthesis-I/2_2.5.1.17_R344-RXN        : 1.0 cob(I)yrinate_a,c-diamide + 1.0 ATP --> 1.0 adenosyl-cobyrinate_a,c-diamide + 1.0
PPPi # source: MetaCyc, BRENDA, KEGG (queried 2.5.1.17)
adenosylcobalamin-biosynthesis-I/3_6.3.5.10_R345-RXN        : 4.0 L-glutamine + 1.0 adenosyl-cobyrinate_a,c-diamide + 4.0 ATP + 4.0 H2O --> 4.0 ADP +
4.0 H+ + 4.0 L-glutamate + 4.0 phosphate + 1.0 adenosylcobyrinate # source: MetaCyc, BRENDA, KEGG (queried 6.3.5.10)
adenosylcobalamin-biosynthesis-I/pp4_2.7.1.177_RXN-8626     : 1.0 L-threonine + 1.0 ATP --> 1.0 L-threonine_3-O-phosphate + 1.0 ADP + 1.0 H+ #
source: MetaCyc, BRENDA, KEGG (queried 2.7.1.177)
adenosylcobalamin-biosynthesis-I/p4_4.1.1.81_4.1.1.81-RXN   : 1.0 L-threonine_3-O-phosphate + 1.0 H+ --> 1.0 CO2 + 1.0 (R)-1-amino-2-propanol_0-2-
phosphate # source: MetaCyc, BRENDA, KEGG (queried 4.1.1.81)
adenosylcobalamin-biosynthesis-I/4_6.3.1.10_RXN-6261        : 1.0 ATP + 1.0 (R)-1-amino-2-propanol_0-2-phosphate + 1.0 adenosylcobyrinate --> 1.0
phosphate + 1.0 ADP + 1.0 adenosyl-cobinamide_phosphate + 1.0 H+ # source: MetaCyc, BRENDA, KEGG (queried 6.3.1.10)

```

```

adenosylcobalamin-biosynthesis-I/5_2.7.7.62_COBINPGUANYLYLTRANS-RXN          : 1.0 H+ + 1.0 GTP + 1.0 adenosyl-cobinamide_phosphate <=> 1.0 diphosphate + 1.0
adenosylcobinamide-GDP # source: MetaCyc, BRENDA, KEGG (queried 2.7.7.62)
adenosylcobalamin-biosynthesis-I/pp6_6.3.4.21_NICOTINATEPRIBOSYLTRANS-RXN    : 1.0 ATP + 1.0 H2O + 1.0 5-phospho-alpha-D-ribose_1-diphosphate + 1.0 nicotinate --> 1.0
beta-nicotinate_D-ribonucleotide + 1.0 phosphate + 1.0 ADP + 1.0 diphosphate # source: MetaCyc, BRENDA, KEGG (queried 6.3.4.21)
adenosylcobalamin-biosynthesis-I/p6_2.4.2.21_DMBPPRIBOSYLTRANS-RXN          : 1.0 beta-nicotinate_D-ribonucleotide + 1.0 5,6-dimethylbenzimidazole --> 1.0 nicotinate
+ 1.0 alpha-ribose_5'-phosphate + 1.0 H+ # source: MetaCyc, BRENDA, KEGG (queried 2.4.2.21)
adenosylcobalamin-biosynthesis-I/6a_2.7.8.26_COBALAMINSYNSYN-RXN           : 1.0 alpha-ribose_5'-phosphate + 1.0 adenosylcobinamide-GDP --> 1.0
adenosylcobalamin_5'-phosphate + 1.0 H+ + 1.0 GMP # source: MetaCyc, BRENDA (queried 2.7.8.26)
adenosylcobalamin-biosynthesis-I/7a_3.1.3.73_RXN-8770                       : 1.0 adenosylcobalamin_5'-phosphate + 1.0 H2O --> 1.0 adenosylcobalamin + 1.0 phosphate
# source: MetaCyc, BRENDA (queried 3.1.3.73)
adenosylcobalamin-biosynthesis-I/6b_3.1.3.73_RIBAZOLEPHOSPHAT-RXN          : 1.0 alpha-ribose_5'-phosphate + 1.0 H2O --> 1.0 alpha-ribose + 1.0 phosphate #
source: MetaCyc, BRENDA, KEGG (queried 3.1.3.73)
adenosylcobalamin-biosynthesis-I/7b_2.7.8.26_COBALAMINSYN-RXN             : 1.0 alpha-ribose + 1.0 adenosylcobinamide-GDP <=> 1.0 adenosylcobalamin + 1.0 GMP +
1.0 H+ # source: MetaCyc, BRENDA, KEGG (queried 2.7.8.26)
#####
#protoporphyrin biosynthesis
protoporphyrin-biosyn/1_4.1.1.37_UROGENDECARBOX-RXN                        : 1.0 uroporphyrinogen-III + 4.0 H+ --> 4.0 CO2 + 1.0 coproporphyrinogen_III # source:
MetaCyc, BRENDA, KEGG (queried 4.1.1.37)
protoporphyrin-biosyn/2_modnames_1.3.99.22_HEMN-RXN                       : 1.0 coproporphyrinogen_III + 2.0 S-adenosyl-L-methionine --> 1.0 protoporphyrin_IX + 2.0
L-methionine + 2.0 5'-deoxyadenosine + 2.0 CO2 # source: MetaCyc, BRENDA, KEGG (queried 1.3.99.22)
protoporphyrin-biosyn/3_6.6.1.1_RXN1F-20                                  : 1.0 ATP + 1.0 H2O + 1.0 protoporphyrin_IX + 1.0 Mg2+ --> 1.0 phosphate + 1.0 Mg-
protoporphyrin + 1.0 ADP + 3.0 H+ # source: MetaCyc, BRENDA, KEGG (queried 6.6.1.1)
#####
#biotin carboxyl carrier protein assembly
biotin-carboxyl-carrier-protein-assembly/1_6.3.4.15_BIOTINLIG-RXN         : 1.0 biotin + 1.0 ATP + 1.0 [BCCP-monomers] --> 1.0 H+ + 1.0 diphosphate + 1.0 AMP + 1.0
[BCCP-biotin-monomers] # source: MetaCyc (queried 6.3.4.15)
biotin-carboxyl-carrier-protein-assembly/2_spontaneous_RXN-7101           : 2.0 [BCCP-biotin-monomers] --> 1.0 [BCCP-dimers] # source: MetaCyc
biotin-carboxyl-carrier-protein-assembly/3_6.3.4.14_BIOTIN-CARBOXYL-RXN   : 1.0 ATP + 1.0 [BCCP-dimers] + 1.0 hydrogen_carbonate --> 1.0 H+ + 1.0 phosphate + 1.0
ADP + 1.0 [Carboxybiotin-BCCP] # source: MetaCyc (queried 6.3.4.14)
#####
#pyridoxal
PLP-biosyn_2.7.1.49_PNKIN-RXN                                             : 1.0 ATP + 1.0 pyridoxine --> 1.0 ADP + 1.0 pyridoxine_5'-phosphate + 1.0 H+ # source:
MetaCyc, BRENDA, KEGG (queried 2.7.1.49) // other EC numbers for this reaction: 2.7.1.35
#####
#L-threonylcarbamoyladenylate
L-threonylcarbamoyladenylate_2.7.7.87_RXN-14569                           : 1.0 hydrogen_carbonate + 1.0 L-threonine + 1.0 ATP <=> 1.0 diphosphate + 1.0 L-
threonylcarbamoyladenylate + 1.0 H2O # source: MetaCyc, BRENDA, KEGG (queried 2.7.7.87)
#####
#NXP de novo biosyn
diphosphate_3.6.1.1_INORGPYROPHOSPHAT-RXN                                : 1.0 H2O + 1.0 diphosphate --> 2.0 phosphate + 1.0 H+ # source: MetaCyc, BRENDA, KEGG
(queried 3.6.1.1) // other EC numbers for this reaction: 2.7.99.1
triphosphate_3.6.1.1_modb_BS383385                                         : 2.0 H2O + 1.0 PPi --> 3.0 phosphate + 1.0 H+ # source: BRENDA (queried 3.6.1.1) //
balanced // contains implicit reactant(s): H+, H2O

diphosphate_2.7.11.32_RXN-13757                                             : 1.0 ADP + 1.0 [pyruvate-phosphate-dikinase] --> 1.0 H+ + 1.0 AMP + 1.0 [pyruvate-
phosphate-dikinase-phosphate] # source: MetaCyc, BRENDA (queried 2.7.11.32)
diphosphate_2.7.4.27_RXN-13756                                             : 1.0 [pyruvate-phosphate-dikinase-phosphate] + 1.0 H+ + 1.0 phosphate <=> 1.0 diphosphate
+ 1.0 [pyruvate-phosphate-dikinase] # source: MetaCyc, BRENDA (queried 2.7.4.27)

#AMP
adenosine-ribonucleotides-de-novo-biosyn/1_6.3.4.4_ADENYLOSUCCINATE-SYNTHASE-RXN : 1.0 L-aspartate + 1.0 IMP + 1.0 GTP --> 1.0 GDP + 1.0 adenylo-succinate + 2.0 H+ + 1.0
phosphate # source: MetaCyc, BRENDA, KEGG (queried 6.3.4.4)
adenosine-ribonucleotides-de-novo-biosyn/2_4.3.2.2_AMP-SYN-RXN             : 1.0 adenylo-succinate <=> 1.0 fumarate + 1.0 AMP # source: MetaCyc, BRENDA, KEGG
(queried 4.3.2.2)

#GMP
guanosine-ribonucleotides-de-novo-biosyn/1_1.1.1.205_IMP-DEHYDROG-RXN      : 1.0 H2O + 1.0 NAD+ + 1.0 IMP <=> 1.0 NADH + 1.0 XMP + 1.0 H+ # source: MetaCyc, BRENDA,
KEGG (queried 1.1.1.205)
guanosine-ribonucleotides-de-novo-biosyn/2_6.3.5.2_GMP-SYN-GLUT-RXN       : 1.0 L-glutamine + 1.0 ATP + 1.0 XMP + 1.0 H2O --> 1.0 AMP + 1.0 diphosphate + 2.0 H+ +
1.0 GMP + 1.0 L-glutamate # source: MetaCyc, BRENDA, KEGG (queried 6.3.5.2)

#UMP
UMP-biosyn/1_2.1.3.2_ASCARBTRANS-RXN                                       : 1.0 carbamoyl_phosphate + 1.0 L-aspartate <=> 1.0 N-carbamoyl-L-aspartate + 1.0

```

```

phosphate + 1.0 H+ # source: MetaCyc, BRENDA, KEGG (queried 2.1.3.2)
UMP-biosyn/2_moddir_3.5.2.3_DIHYDROOROT-RXN : 1.0 H2O + 1.0 (S)-dihydroorotate <=> 1.0 N-carbamoyl-L-aspartate + 1.0 H+ # source:
MetaCyc, BRENDA, KEGG (queried 3.5.2.3)
UMP-biosyn/3_1.3.1.14_OROTATE-REDUCTASE-NADH-RXN : 1.0 NAD+ + 1.0 (S)-dihydroorotate <=> 1.0 orotate + 1.0 H+ + 1.0 NADH # source:
MetaCyc, BRENDA, KEGG (queried 1.3.1.14)
UMP-biosyn/4_2.4.2.10_OROPRIBTRANS-RXN : 1.0 diphosphate + 1.0 orotidine_5'-phosphate <=> 1.0 orotate + 1.0 5-phospho-alpha-D-
ribose_1-diphosphate # source: MetaCyc, BRENDA, KEGG (queried 2.4.2.10)
UMP-biosyn/5_4.1.1.23_OROTPDECARB-RXN : 1.0 orotidine_5'-phosphate + 1.0 H+ --> 1.0 CO2 + 1.0 UMP # source: MetaCyc, BRENDA,
KEGG (queried 4.1.1.23)

#CTP
CTP-biosy2_6.3.4.2_CTPSYN-RXN : 1.0 L-glutamine + 1.0 H2O + 1.0 UTP + 1.0 ATP --> 1.0 CTP + 1.0 ADP + 2.0 H+ + 1.0
phosphate + 1.0 L-glutamate # source: MetaCyc, BRENDA, KEGG (queried 6.3.4.2)

#UTP
UTP-biosyn_3.5.4.5_RXN-14118 : 1.0 H2O + 1.0 H+ + 1.0 CTP --> 1.0 ammonium + 1.0 UTP # source: MetaCyc, BRENDA, KEGG
(queried 3.5.4.5) // other EC numbers for this reaction: 3.5.4.13

#XDP -> dXDP
deoxyribonucleotides-biosyn_1.17.4.1_ADPREDUCT-RXN : 1.0 dADP + 1.0 |Ox-Thioredoxin| + 1.0 H2O <=> 1.0 ADP + 1.0 |Red-Thioredoxin| # source:
MetaCyc, KEGG (queried 1.17.4.1)
deoxyribonucleotides-biosyn_1.17.4.1_GDPREDUCT-RXN : 1.0 |Ox-Thioredoxin| + 1.0 H2O + 1.0 dGDP <-- 1.0 GDP + 1.0 |Red-Thioredoxin| # source:
MetaCyc, KEGG (queried 1.17.4.1)
deoxyribonucleotides-biosyn_1.17.4.1_CDPREDUCT-RXN : 1.0 H2O + 1.0 |Ox-Thioredoxin| + 1.0 dCDP <-- 1.0 |Red-Thioredoxin| + 1.0 CDP # source:
MetaCyc, KEGG (queried 1.17.4.1)
deoxyribonucleotides-biosyn_1.17.4.1_UDPREDUCT-RXN : 1.0 |Ox-Thioredoxin| + 1.0 H2O + 1.0 dUDP <-- 1.0 |Red-Thioredoxin| + 1.0 UDP # source:
MetaCyc, KEGG (queried 1.17.4.1)

#|Oxidized-flavodoxins| --> |Ox-Thioredoxin| because of BRENDA 1.17.4.2 and Clostridium sp.
deoxyribonucleotides-biosyn_mod_1.17.4.2_RXN0-723 : 1.0 |Ox-Thioredoxin| + 1.0 dCTP + 1.0 H2O <-- 1.0 CTP + 1.0 |Red-Thioredoxin| # source:
MetaCyc (queried 1.17.4.2)
deoxyribonucleotides-biosyn_mod_1.17.4.2_RXN0-724 : 1.0 H2O + 1.0 |Ox-Thioredoxin| + 1.0 dUTP <-- 1.0 UTP + 1.0 |Red-Thioredoxin| # source:
MetaCyc (queried 1.17.4.2)
deoxyribonucleotides-biosyn_mod_1.17.4.2_RXN0-745 : 1.0 |Ox-Thioredoxin| + 1.0 dATP + 1.0 H2O <-- 1.0 |Red-Thioredoxin| + 1.0 ATP # source:
MetaCyc (queried 1.17.4.2)
deoxyribonucleotides-biosyn_mod_1.17.4.2_RXN0-746 : 1.0 |Ox-Thioredoxin| + 1.0 H2O + 1.0 dGTP <-- 1.0 GTP + 1.0 |Red-Thioredoxin| # source:
MetaCyc (queried 1.17.4.2)

#dTTP
dTTP-biosyn/1_3.6.1.23_DUTP-PYROP-RXN : 1.0 H2O + 1.0 dUTP --> 1.0 diphosphate + 1.0 dUMP + 1.0 H+ # source: MetaCyc, BRENDA,
KEGG (queried 3.6.1.23) // other EC numbers for this reaction: 3.6.1.19
dTTP-biosyn/2_2.1.1.148_RXN-8850 : 1.0 NADPH + 1.0 5,10-methylene-tetrahydrofolate + 1.0 H+ + 1.0 dUMP --> 1.0
tetrahydropteroyl_tri-L-glutamate + 1.0 dTMP + 1.0 NADP+ # source: MetaCyc (queried 2.1.1.148)
#####
##(d)NMP degradation

#RNA-Abbau
#CMP
CMP-salvage/1_3.1.3.5_RXN-14026 : 1.0 H2O + 1.0 CMP --> 1.0 cytidine + 1.0 phosphate # source: MetaCyc, BRENDA, KEGG
(queried 3.1.3.5) // other EC numbers for this reaction: 3.1.3.91
CMP-salvage/2a_2.7.1.48_CYTIKIN-RXN : 1.0 cytidine + 1.0 ATP --> 1.0 ADP + 1.0 H+ + 1.0 CMP # source: MetaCyc, BRENDA, KEGG
(queried 2.7.1.48) // other EC numbers for this reaction: 2.7.1.B24
CMP-salvage/2b_3.5.4.5_CYTIDEAM2-RXN : 1.0 H2O + 1.0 H+ + 1.0 cytidine --> 1.0 ammonium + 1.0 uridine # source: MetaCyc,
BRENDA, KEGG (queried 3.5.4.5)
CMP-salvage/2c_2.4.2.2_BS355365 : 1.0 cytidine + 1.0 phosphate <=> 1.0 cytosine + 1.0 alpha-D-ribose-1-phosphate #
source: BRENDA, KEGG (queried 2.4.2.2) // other EC numbers for this reaction: 2.4.2.3
#UMP
UMP-salvage/1_3.1.3.5_3.1.3.2_RXN-14025 : 1.0 H2O + 1.0 UMP --> 1.0 uridine + 1.0 phosphate # source: MetaCyc, BRENDA, KEGG
(queried 3.1.3.5, 3.1.3.2)
UMP-salvage/2a_2.7.1.48_URIDINEKIN-RXN : 1.0 ATP + 1.0 uridine --> 1.0 H+ + 1.0 ADP + 1.0 UMP # source: MetaCyc, BRENDA, KEGG
(queried 2.7.1.48)
UMP-salvage/2b_2.4.2.2_URPHOS-RXN : 1.0 phosphate + 1.0 uridine <=> 1.0 alpha-D-ribose-1-phosphate + 1.0 uracil # source:
MetaCyc, BRENDA, KEGG (queried 2.4.2.2) // other EC numbers for this reaction: 2.4.2.3
UMP-salvage/3_2.4.2.9_URACIL-PRIBOSYLTRANS-RXN : 1.0 UMP + 1.0 diphosphate <-- 1.0 5-phospho-alpha-D-ribose_1-diphosphate + 1.0 uracil #

```

```

source: MetaCyc, BRENDA, KEGG (queried 2.4.2.9)
#AMP
AMP-salvage/1_3.1.3.5_3.1.3.2_AMP-DEPHOSPHORYLATION-RXN : 1.0 H2O + 1.0 AMP --> 1.0 phosphate + 1.0 adenosine # source: MetaCyc, BRENDA, KEGG
(queried 3.1.3.5, 3.1.3.2)
AMP-salvage/2_2.4.2.1_ADENPHOSPHOR-RXN : 1.0 adenosine + 1.0 phosphate <=> 1.0 adenine + 1.0 alpha-D-ribose-1-phosphate #
source: MetaCyc, BRENDA, KEGG (queried 2.4.2.1) // other EC numbers for this reaction: 2.4.2.44
AMP-salvage/3_2.4.2.8_2.4.2.7_ADENPRIBOSYLTRAN-RXN : 1.0 AMP + 1.0 diphosphate <-- 1.0 adenine + 1.0 5-phospho-alpha-D-ribose_1-diphosphate
# source: MetaCyc, BRENDA, KEGG (queried 2.4.2.8, 2.4.2.7)
#GMP
GMP-salvage/1_3.1.3.5_3.1.3.2_RXN-7609 : 1.0 H2O + 1.0 GMP --> 1.0 guanosine + 1.0 phosphate # source: MetaCyc, BRENDA, KEGG
(queried 3.1.3.5, 3.1.3.2)
GMP-salvage/2_2.4.2.1_RXN0-5199 : 1.0 guanosine + 1.0 phosphate <=> 1.0 guanine + 1.0 alpha-D-ribose-1-phosphate #
source: MetaCyc, BRENDA, KEGG (queried 2.4.2.1) // other EC numbers for this reaction: 2.4.2.15
GMP-salvage/3_3.5.4.3_GUANINE-DEAMINASE-RXN : 1.0 H2O + 1.0 H+ + 1.0 guanine --> 1.0 ammonium + 1.0 xanthine # source: MetaCyc,
BRENDA, KEGG (queried 3.5.4.3)
GMP-salvage/4_2.4.2.8_2.4.2.22_XANPRIBOSYLTRAN-RXN : 1.0 XMP + 1.0 diphosphate <-- 1.0 xanthine + 1.0 5-phospho-alpha-D-ribose_1-diphosphate
# source: MetaCyc, BRENDA, KEGG (queried 2.4.2.8, 2.4.2.22)
#XMP
XMP-salvage/1_3.1.3.5_XMPXAN-RXN : 1.0 XMP + 1.0 H2O --> 1.0 phosphate + 1.0 xanthosine # source: MetaCyc, BRENDA, KEGG
(queried 3.1.3.5)
XMP-salvage/2_2.4.2.1_XANTHOSINEPHOSPHORY-RXN : 1.0 phosphate + 1.0 xanthosine --> 1.0 alpha-D-ribose-1-phosphate + 1.0 xanthine #
source: MetaCyc, BRENDA, KEGG (queried 2.4.2.1) // other EC numbers for this reaction: 2.4.2
#IMP
IMP-salvage_3.1.3.5_RXN-7607 : 1.0 IMP + 1.0 H2O --> 1.0 inosine + 1.0 phosphate # source: MetaCyc, BRENDA, KEGG
(queried 3.1.3.5) // other EC numbers for this reaction: 3.1.3.v
#adenosine salvage
adenosine-salvage/pa1_3.1.3.5_3.1.3.2_BS73811 : 2.0 H2O + 1.0 ADP --> 2.0 phosphate + 1.0 adenosine # source: BRENDA (queried 3.1.3.5,
3.1.3.2) // other EC numbers for this reaction: 3.6.1.5
adenosine-salvage/pb1_3.1.3.5_BS73810 : 1.0 H2O + 1.0 ADP --> 1.0 diphosphate + 1.0 adenosine # source: BRENDA (queried
3.1.3.5) // other EC numbers for this reaction: 3.1.3.31, 3.6.1.19
adenosine-salvage/1_3.5.4.4_ADENODEAMIN-RXN : 1.0 H2O + 1.0 adenosine + 1.0 H+ --> 1.0 ammonium + 1.0 inosine # source: MetaCyc,
BRENDA, KEGG (queried 3.5.4.4)
adenosine-salvage/2_2.4.2.1_INOPHOSPHOR-RXN : 1.0 phosphate + 1.0 inosine <=> 1.0 alpha-D-ribose-1-phosphate + 1.0 hypoxanthine #
source: MetaCyc, BRENDA, KEGG (queried 2.4.2.1) // other EC numbers for this reaction: 2.4.2.15, 2.4.2.3, 2.4.2.44
adenosine-salvage/3_1.17.1.4_RXN-7682 : 1.0 H2O + 1.0 NAD+ + 1.0 hypoxanthine --> 1.0 xanthine + 1.0 H+ + 1.0 NADH # source:
MetaCyc, BRENDA, KEGG (queried 1.17.1.4) // other EC numbers for this reaction: 1.17.3.2
#DNA-Abbau
#dCMP
dCMP-salvage/1a_3.1.3.5_RXN0-5292 : 1.0 dCMP + 1.0 H2O --> 1.0 2'-deoxycytidine + 1.0 phosphate # source: MetaCyc, BRENDA,
KEGG (queried 3.1.3.5) // other EC numbers for this reaction: 3.1.3.89
dCMP-salvage/2_3.5.4.5_CYTIDEAM-RXN : 1.0 H+ + 1.0 H2O + 1.0 2'-deoxycytidine --> 1.0 2'-deoxyuridine + 1.0 ammonium #
source: MetaCyc, BRENDA, KEGG (queried 3.5.4.5)
dCMP-salvage/11b_3.5.4.12_DCMP-DEAMINASE-RXN : 1.0 H2O + 1.0 H+ + 1.0 dCMP --> 1.0 dUMP + 1.0 ammonium # source: MetaCyc, BRENDA, KEGG
(queried 3.5.4.12)
#dUMP
dUMP-salvage/1_3.1.3.5_RXN-14143 : 1.0 H2O + 1.0 dUMP --> 1.0 phosphate + 1.0 2'-deoxyuridine # source: MetaCyc, BRENDA,
KEGG (queried 3.1.3.5) // other EC numbers for this reaction: 3.1.3.89, 3.1.3.34
dUMP-salvage/2_2.4.2.1_2.4.2.2_URA-PHOSPH-RXN : 1.0 phosphate + 1.0 2'-deoxyuridine <=> 1.0 uracil + 1.0 2-deoxy-alpha-D-ribose_1-
phosphate # source: MetaCyc, BRENDA, KEGG (queried 2.4.2.1, 2.4.2.2) // other EC numbers for this reaction: 2.4.2.3, 2.4.2.4
#dAMP
dAMP-salvage/1_3.1.3.5_3.1.3.2_RXN-14161 : 1.0 H2O + 1.0 dAMP --> 1.0 2'-deoxyadenosine + 1.0 phosphate # source: MetaCyc, BRENDA,
KEGG (queried 3.1.3.5, 3.1.3.2) // other EC numbers for this reaction: 3.1.3.89
dAMP-salvage/2a_2.4.2.1_DEOXYADENPHOSPHOR-RXN : 1.0 phosphate + 1.0 2'-deoxyadenosine <=> 1.0 adenine + 1.0 2-deoxy-alpha-D-ribose_1-
phosphate # source: MetaCyc, BRENDA, KEGG (queried 2.4.2.1)
dAMP-salvage/2b_3.5.4.4_ADDALT-RXN : 1.0 H+ + 1.0 H2O + 1.0 2'-deoxyadenosine --> 1.0 ammonium + 1.0 2'-deoxyinosine #
source: MetaCyc, BRENDA, KEGG (queried 3.5.4.4) // other EC numbers for this reaction: 3.5.4.17
dAMP-salvage/3_2.4.2.1_DEOXYINOPHOSPHOR-RXN : 1.0 phosphate + 1.0 2'-deoxyinosine <=> 1.0 hypoxanthine + 1.0 2-deoxy-alpha-D-ribose_1-
phosphate # source: MetaCyc, BRENDA, KEGG (queried 2.4.2.1) // other EC numbers for this reaction: 2.4.2.4
#dGMP
dGMP-salvage/1_3.1.3.5_3.1.3.2_RXN-14142 : 1.0 H2O + 1.0 dGMP --> 1.0 phosphate + 1.0 2'-deoxyguanosine # source: MetaCyc, BRENDA,
KEGG (queried 3.1.3.5, 3.1.3.2) // there are 4 more EC numbers for this reaction
dGMP-salvage/2_2.4.2.1_DEOXYGUANPHOSPHOR-RXN : 1.0 phosphate + 1.0 2'-deoxyguanosine <=> 1.0 2-deoxy-alpha-D-ribose_1-phosphate + 1.0

```

guanine # source: MetaCyc, BRENDA, KEGG (queried 2.4.2.1) // other EC numbers for this reaction: 2.4.2.15, 2.4.2.4  
 #dTMP  
 dTMP-salvage/1\_3.1.3.5\_THYMIDYLATE-5-PHOSPHATASE-RXN : 1.0 H2O + 1.0 dTMP --> 1.0 phosphate + 1.0 thymidine # source: MetaCyc, BRENDA, KEGG  
 (queried 3.1.3.5) // other EC numbers for this reaction: 3.1.3.89, 3.1.3.35  
 dTMP-salvage/2\_2.4.2.2\_THYM-PHOSPH-RXN : 1.0 thymidine + 1.0 phosphate <=> 1.0 thymine + 1.0 2-deoxy-alpha-D-ribose\_1-phosphate  
 # source: MetaCyc, BRENDA, KEGG (queried 2.4.2.2) // other EC numbers for this reaction: 2.4.2.4

#Salvage - like guanine and guanosine salvage II  
 #adenosine  
 adenosine-salvage/1\_3.2.2.1\_BR16044 : 1.0 adenosine + 1.0 H2O --> 1.0 beta-D-ribofuranose + 1.0 adenine # source: BRENDA,  
 KEGG (queried 3.2.2.1) // other EC numbers for this reaction: 3.2.2.8, 3.2.2.7  
 adenosine-salvage/2\_3.5.4.2\_ADENINE-DEAMINASE-RXN : 1.0 H2O + 1.0 H+ + 1.0 adenine --> 1.0 hypoxanthine + 1.0 ammonium # source: MetaCyc,  
 BRENDA, KEGG (queried 3.5.4.2)  
 #guanosine  
 guanosine-salvage/1\_3.2.2.1\_RXN0-366 : 1.0 H2O + 1.0 guanosine --> 1.0 beta-D-ribofuranose + 1.0 guanine # source: MetaCyc  
 (queried 3.2.2.1)  
 guanosine-salvage/2\_2.4.2.8\_2.4.2.7\_2.4.2.22\_GUANPRIBOSYLTRAN-RXN : 1.0 GMP + 1.0 diphosphate <=> 1.0 guanine + 1.0 5-phospho-alpha-D-ribose\_1-diphosphate  
 # source: MetaCyc, BRENDA, KEGG (queried 2.4.2.8, 2.4.2.7, 2.4.2.22)  
 #inosine  
 inosine-salvage/1\_3.2.2.1\_BR16042 : 1.0 inosine + 1.0 H2O --> 1.0 hypoxanthine + 1.0 beta-D-ribofuranose # source: BRENDA,  
 KEGG (queried 3.2.2.1) // other EC numbers for this reaction: 3.2.2.2, 3.2.2.8  
 inosine-salvage/2\_2.4.2.8\_HYPOXANPRIBOSYLTRAN-RXN : 1.0 diphosphate + 1.0 IMP <=> 1.0 hypoxanthine + 1.0 5-phospho-alpha-D-ribose\_1-  
 diphosphate # source: MetaCyc, BRENDA, KEGG (queried 2.4.2.8)  
 #xanthosine  
 xanthosine-salvage\_3.2.2.1\_RXN0-363 : 1.0 xanthosine + 1.0 H2O --> 1.0 beta-D-ribofuranose + 1.0 xanthine # source: MetaCyc  
 (queried 3.2.2.1)  
 #cytidine  
 cytidine-salvage\_3.2.2.1\_BS214504 : 1.0 cytidine + 1.0 H2O --> 1.0 cytosine + 1.0 beta-D-  
 ribofuranose # source: BRENDA, KEGG (queried 3.2.2.1) // other EC numbers for this reaction: 3.2.2.3, 3.2.2.8  
 #####  
 #2'-deoxy-alpha-D-ribose 1-phosphate degradation  
 2'-deoxy-alpha-D-ribose-1-phosphate-degr/1\_5.4.2.7\_D-PPENTOMUT-RXN : 1.0 2-deoxy-alpha-D-ribose\_1-phosphate <=> 1.0 2-deoxy-D-ribose\_5-phosphate # source:  
 MetaCyc, BRENDA, KEGG (queried 5.4.2.7)  
 2'-deoxy-alpha-D-ribose-1-phosphate-degr/2\_4.1.2.4\_DEOXYRIBOSE-P-ALD-RXN : 1.0 2-deoxy-D-ribose\_5-phosphate <=> 1.0 D-glyceraldehyde\_3-phosphate + 1.0 acetaldehyde  
 # source: MetaCyc, BRENDA, KEGG (queried 4.1.2.4)  
 acetaldehyde-degradation\_1.2.1.3\_1.17.1.4\_RXN66-3 : 1.0 H2O + 1.0 NAD+ + 1.0 acetaldehyde --> 1.0 acetate + 2.0 H+ + 1.0 NADH # source:  
 MetaCyc, BRENDA, KEGG (queried 1.2.1.3, 1.17.1.4) // there are 20 more EC numbers for this reaction

#alpha-D-ribose-1-phosphate degradation  
 PRPP-biosynthesis-II\_5.4.2.2\_5.4.2.7\_PPENTOMUT-RXN : 1.0 alpha-D-ribose-1-phosphate <=> 1.0 D-ribose\_5-phosphate # source: MetaCyc, BRENDA,  
 KEGG (queried 5.4.2.2, 5.4.2.7)

#beta-D-ribofuranose degradation  
 beta-D-ribofuranose-degradation\_modb\_2.7.1.15\_BR47755 : 1.0 ATP + 1.0 beta-D-ribofuranose --> 1.0 D-ribose\_5-phosphate + 1.0 ADP + 1.0 H+ #  
 source: BRENDA, KEGG (queried 2.7.1.15)  
 #####  
 #(d)NXP-transitions (2.7.4.25,2.7.4.3,2.7.4.22,2.7.4.8,2.7.4.9 + not sequence based: 2.7.4.6)

NXP-transitions\_2.7.4.3\_RXN-14074 : 1.0 GTP + 1.0 AMP --> 1.0 ADP + 1.0 GDP # source: MetaCyc, BRENDA (queried 2.7.4.3) // other EC numbers  
 for this reaction: 2.7.4.4, 2.7.4.10  
 NXP-transitions\_2.7.4.8\_GUANYL-KIN-RXN : 1.0 ATP + 1.0 GMP --> 1.0 ADP + 1.0 GDP # source: MetaCyc, BRENDA, KEGG (queried 2.7.4.8)  
 NXP-transitions\_2.7.4.6\_GDPKIN-RXN : 1.0 ATP + 1.0 GDP --> 1.0 ADP + 1.0 GTP # source: MetaCyc, BRENDA, KEGG (queried 2.7.4.6)

NXP-transitions\_2.7.4.22\_RXN-12002 : 1.0 UMP + 1.0 ATP --> 1.0 ADP + 1.0 UDP # source: MetaCyc, BRENDA, KEGG (queried 2.7.4.22) // other EC  
 numbers for this reaction: 2.7.4.4, 2.7.4.14  
 NXP-transitions\_2.7.4.3\_BS358186 : 1.0 UTP + 1.0 AMP <-- 1.0 ADP + 1.0 UDP # source: BRENDA, KEGG (queried 2.7.4.3) // other EC numbers for  
 this reaction: 2.7.4.10

NXP-transitions\_2.7.4.25\_2.7.4.3\_RXN-11832 : 1.0 CMP + 1.0 ATP --> 1.0 ADP + 1.0 CDP # source: MetaCyc, BRENDA, KEGG (queried 2.7.4.25, 2.7.4.3) //  
 other EC numbers for this reaction: 2.7.4.14  
 NXP-transitions\_2.7.4.3\_CDPKIN-RXN : 1.0 ATP + 1.0 CDP --> 1.0 ADP + 1.0 CTP # source: MetaCyc, BRENDA, KEGG (queried 2.7.4.3) // other EC  
 numbers for this reaction: 2.7.4.6

```

NXP-transitions_2.7.4.3_ADENYL-KIN-RXN          : 1.0 ATP + 1.0 AMP --> 2.0 ADP # source: MetaCyc, BRENDA, KEGG (queried 2.7.4.3)
NXP-transitions_2.7.4.3_DEOXYADENYLATE-KINASE-RXN : 1.0 dAMP + 1.0 ATP --> 1.0 ADP + 1.0 dADP # source: MetaCyc, BRENDA, KEGG (queried 2.7.4.3) // other EC
numbers for this reaction: 2.7.4.13, 2.7.4.11
NXP-transitions_2.7.4.8_GMKALT-RXN             : 1.0 dGMP + 1.0 ATP --> 1.0 ADP + 1.0 dGDP # source: MetaCyc, BRENDA, KEGG (queried 2.7.4.8) // other EC
numbers for this reaction: 2.7.4.12, 2.7.4.13
NXP-transitions_2.7.4.25_RXN-7913             : 1.0 ATP + 1.0 dCMP --> 1.0 ADP + 1.0 dCDP # source: MetaCyc, BRENDA, KEGG (queried 2.7.4.25) // other EC
numbers for this reaction: 2.7.4.14, 2.7.4.13
NXP-transitions_2.7.4.9_DTMPKI-RXN           : 1.0 dTMP + 1.0 ATP --> 1.0 dTDP + 1.0 ADP # source: MetaCyc, BRENDA, KEGG (queried 2.7.4.9) // other EC
numbers for this reaction: 2.7.4.12, 2.7.4.13
NXP-transitions_2.7.4.9_RXN-17141            : 1.0 GTP + 1.0 dTMP --> 1.0 GDP + 1.0 dTDP # source: MetaCyc, BRENDA (queried 2.7.4.9) // other EC numbers
for this reaction: 2.7.4.M1

NXP-transitions_2.7.4.6_DTDPKIN-RXN          : 1.0 dTDP + 1.0 ATP --> 1.0 ADP + 1.0 dTTP # source: MetaCyc, BRENDA, KEGG (queried 2.7.4.6)

NXP-transitions_2.7.4.22_2.7.4.9_2.7.4.25_RXN-14122 : 1.0 ATP + 1.0 dUMP --> 1.0 ADP + 1.0 dUDP # source: MetaCyc, BRENDA, KEGG (queried 2.7.4.22, 2.7.4.9,
2.7.4.25) // there are 4 more EC numbers for this reaction

NXP-transitions_2.7.4.6_DADPKIN-RXN          : 1.0 dADP + 1.0 ATP --> 1.0 ADP + 1.0 dATP # source: MetaCyc, BRENDA, KEGG (queried 2.7.4.6)
NXP-transitions_2.7.4.6_DGDPKIN-RXN         : 1.0 dGDP + 1.0 ATP --> 1.0 ADP + 1.0 dGTP # source: MetaCyc, BRENDA, KEGG (queried 2.7.4.6)
NXP-transitions_2.7.4.6_DUDPKIN-RXN         : 1.0 ATP + 1.0 dUDP --> 1.0 ADP + 1.0 dUTP # source: MetaCyc, BRENDA, KEGG (queried 2.7.4.6)
NXP-transitions_2.7.4.6_DCDPKIN-RXN         : 1.0 dCDP + 1.0 ATP --> 1.0 ADP + 1.0 dCTP # source: MetaCyc, BRENDA, KEGG (queried 2.7.4.6)
#####
#ppGpp
ppGpp-biosynthesis_2.7.6.5_GDPPYPHOSKIN-RXN : 1.0 GDP + 1.0 ATP --> 1.0 AMP + 1.0 ppGpp # source: MetaCyc, BRENDA (queried 2.7.6.5) // other EC numbers
for this reaction: 2.7.6.4
ppGpp-biosynthesis_2.7.6.5_GTPPYPHOSKIN-RXN : 1.0 GTP + 1.0 ATP --> 1.0 AMP + 1.0 pppGpp # source: MetaCyc, BRENDA, KEGG (queried 2.7.6.5)
ppGpp-biosynthesis_3.6.1.40_PPPGPPHYDRO-RXN : 1.0 H2O + 1.0 pppGpp --> 1.0 ppGpp + 1.0 phosphate + 1.0 H+ # source: MetaCyc, BRENDA, KEGG (queried
3.6.1.40) // other EC numbers for this reaction: 3.6.1.11
#####
#uracil degr I
uracil-degr-I/1_1.3.1.1_DIHYDROURACIL-DEHYDROGENASE-NAD+-RXN : 1.0 5,6-dihydrouracil + 1.0 NAD+ <=> 1.0 H+ + 1.0 NADH + 1.0 uracil # source: MetaCyc, BRENDA, KEGG
(queried 1.3.1.1)
uracil-degr-I/2_3.5.2.2_DIHYDROPRIMIDINASE-RXN : 1.0 5,6-dihydrouracil + 1.0 H2O --> 1.0 3-ureidopropanoate + 1.0 H+ # source: MetaCyc, BRENDA, KEGG
(queried 3.5.2.2)
uracil-degr-I/3_3.5.1.6_BETA-UREIDOPROPIONASE-RXN : 2.0 H+ + 1.0 3-ureidopropanoate + 1.0 H2O --> 1.0 ammonium + 1.0 CO2 + 1.0 beta-alanine # source:
MetaCyc, BRENDA, KEGG (queried 3.5.1.6)

#thymine degr
thymine-degradation_1.3.1.1_RXN0-6565       : 1.0 NAD+ + 1.0 5,6-dihydrothymine <=> 1.0 thymine + 1.0 H+ + 1.0 NADH # source: MetaCyc, BRENDA, KEGG
(queried 1.3.1.1)
thymine-degradation_3.5.2.2_RXN-11211       : 1.0 5,6-dihydrothymine + 1.0 H2O --> 1.0 (R)-3-ureido-isobutanoate + 1.0 H+ # source: MetaCyc, BRENDA
(queried 3.5.2.2)
thymine-degradation_3.5.1.6_RXN-11210      : 1.0 H2O + 2.0 H+ + 1.0 (R)-3-ureido-isobutanoate --> 1.0 (R)-3-amino-2-methylpropanoate + 1.0 CO2 + 1.0
ammonium # source: MetaCyc, KEGG (queried 3.5.1.6)

#####
#####Non-MDM/CDMM substrates#####
#####
#cytosine
cytosine_exchange                          : 1.0 cytosine[ex] <=>
thymine_exchange                           : 1.0 thymine[ex] <=>

##CDIF630erm_01905; CDIF630erm_03001
cytosine_transport                         : 1.0 Na+ + 1.0 cytosine <=> 1.0 cytosine[ex] + 1.0 Na+[ex]
thymine_transport                         : 1.0 Na+ + 1.0 thymine <=> 1.0 thymine[ex] + 1.0 Na+[ex]
#####
#adenine/guanine/hypoxanthine
adenine_exchange                          : 1.0 adenine[ex] <=>
guanine_exchange                          : 1.0 guanine[ex] <=>
hypoxanthine_exchange                     : 1.0 hypoxanthine[ex] <=>

##CDIF630erm_02331; CDIF630erm_02961

```

```

adenine_transport      : 1.0 Na+ + 1.0 adenine <=> 1.0 adenine[ex] + 1.0 Na+[ex]
guanine_transport     : 1.0 Na+ + 1.0 guanine <=> 1.0 guanine[ex] + 1.0 Na+[ex]
hypoxanthine_transport : 1.0 Na+ + 1.0 hypoxanthine <=> 1.0 hypoxanthine[ex] + 1.0 Na+[ex]
#####
#uracil
uracil_exchange       : 1.0 uracil[ex] <=>

##CDIF630erm_02848
uracil_transport      : 1.0 Na+ + 1.0 uracil <=> 1.0 uracil[ex] + 1.0 Na+[ex]
#####
#xanthine/urate
xanthine_exchange     : 1.0 xanthine[ex] <=>
urate_exchange        : 1.0 urate[ex] <=>

##CDIF630erm_02298; CDIF630erm_02313; CDIF630erm_02314; CDIF630erm_03472
xanthine_transport    : 1.0 Na+ + 1.0 xanthine <=> 1.0 xanthine[ex] + 1.0 Na+[ex]
urate_transport       : 1.0 Na+ + 1.0 urate <=> 1.0 urate[ex] + 1.0 Na+[ex]

urate-degradation_1.17.1.4_RXN0-901      : 1.0 xanthine + 1.0 H2O + 1.0 NAD+ <=> 1.0 urate + 1.0 H+ + 1.0 NADH # source: MetaCyc, BRENDA, KEGG (queried 1.17.1.4)

#####
asparagine_exchange   : 1.0 L-asparagine[ex] <=>
glutamine_exchange    : 1.0 L-glutamine[ex] <=>

#unknown, ABC-transporter is a guess
##CDIF630erm_01972-CDIF630erm_01974?; CDIF630erm_00868-CDIF630erm_00870?
glutamine_transport   : 1.0 H2O + 1.0 ATP + 1.0 L-glutamine[ex] --> 1.0 L-glutamine + 1.0 ADP + 1.0 phosphate + 1.0 H+
asparagine_transport  : 1.0 H2O + 1.0 ATP + 1.0 L-asparagine[ex] --> 1.0 H+ + 1.0 phosphate + 1.0 ADP + 1.0 L-asparagine
#####
#4-hydroxyproline
4-hydroxyproline_exchange : 1.0 trans-4-hydroxy-L-proline[ex] <=>
4-hydroxyproline_transport : 1.0 Na+ + 1.0 trans-4-hydroxy-L-proline <=> 1.0 Na+[ex] + 1.0 trans-4-hydroxy-L-proline[ex]
4-hydroxyproline-degr/1_manual_4.2.1.-_HD-Hyp : 1.0 trans-4-hydroxy-L-proline <=> 1.0 (S)-1-pyrroline-5-carboxylate + 1.0 H2O
4-hydroxyproline-degr/2_1.5.1.2_PYRROLINECARBREDUCT-RXN : 1.0 NADP+ + 1.0 L-proline <-- 1.0 (S)-1-pyrroline-5-carboxylate + 1.0 NADPH + 2.0 H+ # source: MetaCyc,
BRENDA, KEGG (queried 1.5.1.2)
#####
#cystathionine
cystathionine_exchange : 1.0 L-cystathionine[ex] <=>

##CDIF630erm_02404-CDIF630erm_02406 vgl. Burguière et al., 2004
cystathionine_transport : 1.0 H2O + 1.0 ATP + 1.0 L-cystathionine[ex] --> 1.0 H+ + 1.0 phosphate + 1.0 ADP + 1.0 L-cystathionine

cystathionine-degr-A_4.4.1.8_RXN-15131 : 1.0 L-cystathionine --> 1.0 H+ + 1.0 2-aminoprop-2-enoate + 1.0 L-homocysteine # source: MetaCyc, BRENDA (queried 4.4.1.8)
cystathionine-degr-B_4.4.1.1_RXN-14048 : 1.0 L-cystathionine --> 1.0 (2Z)-2-aminobut-2-enoate + 1.0 H+ + 1.0 L-cysteine # source: MetaCyc, BRENDA, KEGG (queried 4.4.1.1)
#####
spermidine_exchange   : 1.0 spermidine[ex] <=>
putrescine_exchange   : 1.0 putrescine[ex] <=>

##CDIF630erm_01160-CDIF630erm_01163
putrescine_transport_3.6.3.31_modb_BS141431 : 1.0 ATP + 1.0 H2O + 1.0 putrescine[ex] --> 1.0 putrescine + 1.0 ADP + 1.0 phosphate + 1.0 H+ # ource: MetaCyc, BRENDA (queried
3.6.3.31)
spermidine_transport_3.6.3.31_modb_BS141432 : 1.0 ATP + 1.0 H2O + 1.0 spermidine[ex] --> 1.0 spermidine + 1.0 phosphate + 1.0 ADP + 1.0 H+ # source: MetaCyc, BRENDA (queried
3.6.3.31)
#####
#2,3-diaminopropanoate degradation
2,3-diaminopropanoate_exchange : 1.0 [23-Diaminopropanoate][ex] <=>
2,3-diaminopropanoate_transport : 1.0 ATP + 1.0 [23-Diaminopropanoate][ex] + 1.0 H2O --> 1.0 ADP + 1.0 phosphate + 1.0 [23-
Diaminopropanoate] + 1.0 H+
2,3-diaminopropanoate-degr_4.3.1.15_4.3.1.15-RXN : 1.0 [23-Diaminopropanoate] + 1.0 H2O --> 2.0 ammonium + 1.0 pyruvate # source: MetaCyc, BRENDA, KEGG
(queried 4.3.1.15)

hydroxylamine_exchange : 1.0 hydroxylamine[ex] <=>
hydroxylamine_transport : 1.0 hydroxylamine[ex] <=> 1.0 hydroxylamine
hydroxylamine_1.7.99.1_HYDROXYLAMINE-REDUCTASE-NADH-RXN : 1.0 H2O + 1.0 NAD+ + 1.0 ammonium <=> 2.0 H+ + 1.0 NADH + 1.0 hydroxylamine # source: MetaCyc, BRENDA,

```

```

KEGG (queried 1.7.99.1) // other EC numbers for this reaction: 1.7.1.10
#####
#ethanolamine utilization
#(Pitts et al., 2012)
ethanolamine_exchange : 1.0 ethanolamine[ex] <=>
##CDIF630erm_02128
ethanolamine_transport1 : 1.0 ethanolamine <=> 1.0 ethanolamine[ex]
##CDIF630erm_02119
ethanolamine_transport2 : 1.0 ethanolamine[BMC] <-- 1.0 ethanolamine

ethanolamine-utilization/1_4.3.1.7_ETHAMLY-RXN : 1.0 ethanolamine[BMC] --> 1.0 ammonium + 1.0 acetaldehyde[BMC] # source: MetaCyc, BRENDA,
KEGG (queried 4.3.1.7)
ethanolamine-utilization/2_1.2.1.10_ACETALD-DEHYDROG-RXN : 1.0 NAD+[BMC] + 1.0 coenzyme_A[BMC] + 1.0 acetaldehyde[BMC] <=> 1.0 NADH[BMC] + 1.0 acetyl-
CoA[BMC] + 1.0 H+ # source: MetaCyc, BRENDA, KEGG (queried 1.2.1.10)
ethanolamine-utilization/3_2.3.1.8_PHOSACETYLTRANS-RXN : 1.0 acetyl-CoA[BMC] + 1.0 phosphate <=> 1.0 acetyl_phosphate + 1.0 coenzyme_A[BMC] #
source: MetaCyc, BRENDA, KEGG (queried 2.3.1.8)
ethanolamine-utilization/4_1.1.1.1_ALCOHOL-DEHYDROGENASE-NADP+-RXN_WOP : 1.0 NAD+[BMC] + 1.0 ethanol <=> 1.0 NADH[BMC] + 1.0 acetaldehyde[BMC] + 1.0 H+ # source:
MetaCyc, BRENDA, KEGG (queried 1.1.1.1) // other EC numbers for this reaction: 1.1.1.71
#####
sn-glycerol-3-phosphate_exchange : 1.0 sn-glycerol_3-phosphate[ex] <=>

##CDIF630erm_03719-CDIF630erm_03722
sn-glycerol-3-phosphate_transport : 1.0 ATP + 1.0 sn-glycerol_3-phosphate[ex] + 1.0 H2O --> 1.0 ADP + 1.0 sn-glycerol_3-phosphate + 1.0 phosphate + 1.0 H+
#####
#methylphosphonate degr II
methylphosphonate_exchange : 1.0 methylphosphonate[ex] <=>
##CDIF630erm_03847-CDIF630erm_03848
methylphosphonate_transport : 1.0 methylphosphonate + 1.0 ADP + 1.0 H+ <-- 1.0 methylphosphonate[ex] + 1.0 ATP + 1.0 H2O
methane_transport : 1.0 methane <=> 1.0 methane[ex]
methane_exchange : 1.0 methane[ex] <=>

methylphosphonate-degr-II/1_2.7.8.37_RXN0-6732 : 1.0 ATP + 1.0 methylphosphonate --> 1.0 adenine + 1.0 alpha-D-ribose-1-methylphosphonate-5-
triphosphate # source: MetaCyc, BRENDA, KEGG (queried 2.7.8.37)
methylphosphonate-degr-II/2_3.6.1.63_RXN0-6733 : 1.0 H2O + 1.0 alpha-D-ribose-1-methylphosphonate-5-triphosphate --> 1.0 H+ + 1.0 diphosphate
+ 1.0 alpha-D-ribose-1-methylphosphonate_5-phosphate # source: MetaCyc, BRENDA, KEGG (queried 3.6.1.63)
methylphosphonate-degr-II/3_4.7.1.1_RXN0-6734 : 1.0 alpha-D-ribose-1-methylphosphonate_5-phosphate --> 1.0 5-phospho-alpha-D-ribose_1,2-
cyclic_phosphate + 1.0 methane # source: MetaCyc, BRENDA, KEGG (queried 4.7.1.1)
methylphosphonate-degr-II/4_3.1.4.57_RXN-14995 : 1.0 H2O + 1.0 5-phospho-alpha-D-ribose_1,2-cyclic_phosphate --> 1.0 D-ribofuranose_2,5-
bisphosphate + 1.0 H+ # source: MetaCyc, BRENDA, KEGG (queried 3.1.4.57)
methylphosphonate-degr-II/5_3.1.4.57_RXN-14996 : 1.0 D-ribofuranose_2,5-bisphosphate + 1.0 H2O --> 1.0 phosphate + 1.0 D-ribose_5-phosphate
# source: MetaCyc, BRENDA, KEGG (queried 3.1.4.57)
#####
#2-aminoethylP degr I
2-aminoethylphosphonate_exchange : 1.0 (2-aminoethyl)phosphonate[ex] <=>
##CDIF630erm_03847-CDIF630erm_03848
2-aminoethylphosphonate_transport : 1.0 2-aminoethylphosphonate + 1.0 ADP + 1.0 H+ <-- 1.0 (2-aminoethyl)phosphonate[ex] + 1.0
ATP + 1.0 H2O
2-aminoethylphosph-degr-I/1_2.6.1.37_2.6.1.37-RXN : 1.0 pyruvate + 1.0 (2-aminoethyl)phosphonate <=> 1.0 phosphonoacetaldehyde + 1.0 L-alanine
# source: MetaCyc, BRENDA, KEGG (queried 2.6.1.37)
2-aminoethylphosph-degr-I/2_3.11.1.1_PHOSPHONOACETALDEHYDE-HYDROLASE-RXN : 1.0 phosphonoacetaldehyde + 1.0 H2O --> 1.0 acetaldehyde + 1.0 phosphate + 1.0 H+ # source:
MetaCyc, BRENDA, KEGG (queried 3.11.1.1)
#####
#phosphonoacetate degradation
phosphonoacetate_exchange : 1.0 phosphonoacetate[ex] <=>
##CDIF630erm_03847-CDIF630erm_03848
phosphonoacetate_transport : 1.0 phosphonoacetate + 1.0 ADP + 1.0 H+ + 1.0 phosphate <-- 1.0 phosphonoacetate[ex] + 1.0
ATP + 1.0 H2O
phosphonoacetate-degradation_3.11.1.2_3.11.1.2-RXN : 1.0 H2O + 1.0 phosphonoacetate --> 1.0 acetate + 1.0 phosphate + 1.0 H+ # source: MetaCyc,
BRENDA, KEGG (queried 3.11.1.2)
#####
succinate_exchange : 1.0 succinate[ex] <=>
##CDIF630erm_02583
succinate_transport : 1.0 Na+ + 1.0 succinate <=> 1.0 succinate[ex] + 1.0 Na+[ex]
#####

```



```

#tartronate semialdehyde
tartronate-semialdehyde_exchange          : 1.0 tartronate_semialdehyde[ex] <=>
tartronate-semialdehyde_transport         : 1.0 tartronate_semialdehyde[ex] + 1.0 Na+[ex] <=> 1.0 tartronate_semialdehyde + 1.0 Na+

tartronate-semialdehyde-degr_1.1.1.60_TSA-REDUCT-RXN_WOP          : 1.0 NAD+ + 1.0 D-glycerate <=> 1.0 NADH + 1.0 H+ + 1.0 tartronate_semialdehyde # source:
MetaCyc, BRENDA, KEGG (queried 1.1.1.60) // other EC numbers for this reaction: 1.1.1
tartronate-semialdehyde-degr_1.1.1.60_TSA-REDUCT-RXN            : 1.0 NADP+ + 1.0 D-glycerate <- 1.0 tartronate_semialdehyde + 1.0 H+ + 1.0 NADPH # source:
MetaCyc, BRENDA, KEGG (queried 1.1.1.60)
#####
#Acetoin degradation
acetoin_exchange          : 1.0 acetoin[ex] <=>
acetoin_transport        : 1.0 acetoin[ex] + 1.0 H+[ex] <=> 1.0 acetoin + 1.0 H+ # metacyc
acetoin-degradation_2.3.1.190_RXN-9718          : 1.0 acetoin + 1.0 NAD+ + 1.0 coenzyme_A --> 1.0 acetyl-CoA + 1.0 acetaldehyde + 1.0 H+ + 1.0
NADH # source: MetaCyc, BRENDA, KEGG (queried 2.3.1.190)
#####
#3-hydroxy-3-methylglutarate
3-hydroxy-3-methylglutarate_exchange          : 1.0 3-hydroxy-3-methylglutarate[ex] <=>
##CDIF630erm_00917
3-hydroxy-3-methylglutarate_transport         : 1.0 H+ + 1.0 3-hydroxy-3-methylglutarate <=> 1.0 H+[ex] + 1.0 3-hydroxy-3-
methylglutarate[ex]
3-hydroxy-3-methylglutarate-degr/1_manual_2.8.3.-_HD-3MG          : 1.0 acetyl-CoA + 1.0 3-hydroxy-3-methylglutarate --> 1.0 (S)-3-hydroxy-3-methylglutaryl-CoA
+ 1.0 acetate # source: MetaCyc, BRENDA, KEGG (queried 2.8.3.1, 2.8.3)
3-hydroxy-3-methylglutarate-degr/2_4.1.3.4_HYDROXYMETHYLGLUTARYL-COA-LYASE-RXN : 1.0 (S)-3-hydroxy-3-methylglutaryl-CoA --> 1.0 acetyl-CoA + 1.0 acetoacetate # source:
MetaCyc, BRENDA, KEGG (queried 4.1.3.4)
#####
#oxidized-GTP
hydroxyl-radical_exchange          : 1.0 hydroxyl_radical[ex] <-
hydroxyl-radical_transport        : 1.0 hydroxyl_radical[ex] --> 1.0 hydroxyl_radical
oxidized-GTP-and-dGTP-detoxification_spontaneous_RXN-11409      : 1.0 GTP + 2.0 hydroxyl_radical --> 1.0 8-oxo-GTP + 1.0 H2O # source: MetaCyc
oxidized-GTP-and-dGTP-detoxification_spontaneous_RXN-11410      : 2.0 hydroxyl_radical + 1.0 dGTP --> 1.0 8-oxo-dGTP + 1.0 H2O # source: MetaCyc
oxidized-GTP-and-dGTP-detoxification_3.6.1.55_RXN-11397        : 1.0 H2O + 1.0 8-oxo-GTP --> 1.0 8-oxo-GMP + 1.0 diphosphate + 1.0 H+ # source: MetaCyc,
BRENDA (queried 3.6.1.55) // other EC numbers for this reaction: 3.6.1, 3.6.1.19, 3.6.1.56
oxidized-GTP-and-dGTP-detoxification_3.6.1.55_RXN-11396        : 1.0 H2O + 1.0 8-oxo-dGTP --> 1.0 8-oxo-dGMP + 1.0 diphosphate + 1.0 H+ # source: MetaCyc,
BRENDA, KEGG (queried 3.6.1.55) // other EC numbers for this reaction: 3.6.1.65
8-oxo-GMP_transport          : 1.0 8-oxo-GMP[ex] <- 1.0 8-oxo-GMP
8-oxo-dGMP_transport        : 1.0 8-oxo-dGMP[ex] <- 1.0 8-oxo-GMP
8-oxo-GMP_exchange          : 1.0 8-oxo-GMP[ex] -->
8-oxo-dGMP_exchange        : 1.0 8-oxo-dGMP[ex] -->
#####
#reactive oxygen detoxification
superoxide_exchange          : 1.0 superoxide[ex] <-
hydrogen_peroxide_exchange   : 1.0 hydrogen_peroxide[ex] <-
oxygen_exchange             : 1.0 oxygen[ex] <-
methanol_exchange           : 1.0 methanol[ex] <-
superoxide_transport        : 1.0 superoxide <=> 1.0 superoxide[ex]
hydrogen_peroxide_transport  : 1.0 hydrogen_peroxide <=> 1.0 hydrogen_peroxide[ex]
oxygen_transport            : 1.0 oxygen <=> 1.0 oxygen[ex]
methanol_transport          : 1.0 methanol <=> 1.0 methanol[ex]

superoxide-radicals-degr-A/1_1.15.1.1_SUPEROX-DISMUT-RXN        : 2.0 H+ + 2.0 superoxide --> 1.0 hydrogen_peroxide + 1.0 oxygen # source: MetaCyc, BRENDA, KEGG (queried
1.15.1.1)
superoxide-radicals-degr-A/2a_1.11.1.6_CATAL-RXN                : 2.0 hydrogen_peroxide --> 2.0 H2O + 1.0 oxygen # source: MetaCyc, BRENDA, KEGG (queried 1.11.1.6) //
other EC numbers for this reaction: 1.11.1.21
superoxide-radicals-degr-A/2b_1.11.1.6_RXN66-1                  : 1.0 ethanol + 1.0 hydrogen_peroxide --> 1.0 acetaldehyde + 2.0 H2O # source: MetaCyc (queried 1.11.1.6)
superoxide-radicals-degr-A/2c_moddir_1.11.1.6_RXN-14189        : 1.0 methanol + 1.0 hydrogen_peroxide <=> 1.0 formaldehyde + 2.0 H2O # source: MetaCyc, BRENDA, KEGG
(queried 1.11.1.6) // other EC numbers for this reaction: 1.11.1.7, 1.11.1.21

superoxide-radicals-degr-B/1_1.15.1.2_1.15.1.2-RXN            : 1.0 superoxide + 1.0 |Reduced-Rubredoxins| + 2.0 H+ <=> 1.0 |Oxidized-Rubredoxins| + 1.0 hydrogen_peroxide
# source: MetaCyc, BRENDA, KEGG (queried 1.15.1.2)
superoxide-radicals-degr-B/2_manual_1.11.1.-_HD-1.11.1.-        : 1.0 |Reduced-Rubredoxins| + 2.0 H+ + 1.0 hydrogen_peroxide <=> 1.0 |Oxidized-Rubredoxins| + 2.0 H2O #
source: MetaCyc, BRENDA, KEGG (queried 1.11.1.1)
superoxide-radicals-degr-B/3_manual_1.4.-_HD-1.4.-              : 2.0 L-glutamate + 1.0 |Oxidized-Rubredoxins| --> 1.0 L-glutamine + 1.0 2-oxoglutarate + 1.0 |Reduced-
Rubredoxins| + 2.0 H+ # source: MetaCyc, KEGG (queried 1.4.7.1)

```

```

oxygen-reduction-A_1.6.3.-_HD-1.6.3.- : 2.0 |Reduced-Rubredoxins| + 4.0 H+ + 1.0 oxygen --> 2.0 |Oxidized-Rubredoxins| + 2.0 H2O
oxygen-reduction-B_1.6.3.4_RXN-14692 : 2.0 H+ + 2.0 NADH + 1.0 oxygen --> 2.0 NAD+ + 2.0 H2O # source: MetaCyc, BRENDA, KEGG (queried
1.6.3.4) // other EC numbers for this reaction: 1.6.3.2
formaldehyde-assimilation_spontaneous_2.1.2.11_RXN-2881 : 1.0 formaldehyde + 1.0 tetrahydropteroyl_tri-L-glutamate --> 1.0 H2O + 1.0 5,10-methylene-tetrahydrofolate
# source: MetaCyc
#####
#cyanide detoxification I
cyanide_exchange : 1.0 hydrogen_cyanide[ex] <--
thiocyanate_exchange : 1.0 thiocyanate[ex] <--
cyanide_transport : 1.0 hydrogen_cyanide <=> 1.0 hydrogen_cyanide[ex]
thiocyanate_transport : 1.0 thiocyanate + 1.0 H+ <=> 1.0 thiocyanate[ex] + 1.0 H+[ex]

cyanide-detoxification-I/1_4.4.1.9_L-3-CYANOALANINE-SYNTHASE-RXN : 1.0 hydrogen_cyanide + 1.0 L-cysteine <=> 1.0 3-cyano-L-alanine + 1.0 hydrogen_sulfide + 1.0 H+ #
source: MetaCyc, BRENDA, KEGG (queried 4.4.1.9)
cyanide-detoxification-I/2a_3.5.5.4_3.5.5.4-RXN : 2.0 H2O + 1.0 3-cyano-L-alanine + 1.0 H+ --> 1.0 ammonium + 1.0 L-aspartate # source: MetaCyc,
BRENDA, KEGG (queried 3.5.5.4)
cyanide-detoxification-I/2b_4.2.1.65_3.5.5.4_3-CYANOALANINE-HYDRATASE-RXN : 1.0 L-asparagine <-- 1.0 3-cyano-L-alanine + 1.0 H+ + 1.0 H2O # source: MetaCyc, BRENDA, KEGG
(queried 4.2.1.65, 3.5.5.4)

#cyanide detoxification
cyanide-detoxification-III/1_2.8.1.2_R03105 : 1.0 sulfite + 1.0 3-mercaptopyruvate <=> 1.0 pyruvate + 1.0 thiosulfate # source: KEGG (queried
2.8.1.2)
cyanide-detoxification-III/2_2.8.1.1_THIOSULFATE-SULFURTRANSFERASE-RXN : 1.0 thiosulfate + 1.0 hydrogen_cyanide --> 1.0 sulfite + 1.0 thiocyanate + 2.0 H+ # source: MetaCyc,
BRENDA, KEGG (queried 2.8.1.1)

#Cysteine degr III
L-cysteine-degradation-III/1_2.6.1.1_CYSTEINE-AMINOTRANSFERASE-RXN : 1.0 L-cysteine + 1.0 2-oxoglutarate <=> 1.0 3-mercaptopyruvate + 1.0 L-glutamate # source: MetaCyc,
BRENDA, KEGG (queried 2.6.1.1) // other EC numbers for this reaction: 2.6.1.3
L-cysteine-degradation-III/2_2.8.1.2_MERCAPYSTRANS-RXN : 1.0 hydrogen_cyanide + 1.0 3-mercaptopyruvate --> 1.0 thiocyanate + 1.0 H+ + 1.0 pyruvate # source:
MetaCyc, BRENDA, KEGG (queried 2.8.1.2)
#####
#bile acids

taurochenodeoxycholate_exchange : 1.0 taurochenodeoxycholate[ex] <=>
chenodeoxycholate_exchange : 1.0 chenodeoxycholate[ex] <=>
taurocholate_exchange : 1.0 taurocholate[ex] <=>
cholate_exchange : 1.0 cholate[ex] <=>

##DIF630erm_02170
taurochenodeoxycholate_transport : 1.0 H+[ex] + 1.0 taurochenodeoxycholate[ex] <=> 1.0 H+ + 1.0 taurochenodeoxycholate
chenodeoxycholate_transport : 1.0 H+[ex] + 1.0 chenodeoxycholate[ex] <=> 1.0 H+ + 1.0 chenodeoxycholate
taurocholate_transport : 1.0 H+[ex] + 1.0 taurocholate[ex] <=> 1.0 H+ + 1.0 taurocholate
cholate_transport : 1.0 H+[ex] + 1.0 cholate[ex] <=> 1.0 H+ + 1.0 cholate

#C. difficile can degrade taurocholate and no glycocholate (Midtvedt and Norman, 1967)
# => no EC 3.5.1.24; No sequences for EC 3.5.1.74 known
#Highest similarity to mouse enzyme. Mouse enzyme is taurine-specific (Falany et al., 1997)
#Reverse biosynthesis pathway

taurochenodeoxycholate-degr/1_2.3.1.65_RXN-9852 : 1.0 chenodeoxycholoyl-CoA + 1.0 taurine --> 1.0 taurochenodeoxycholate + 1.0 coenzyme_A +
1.0 H+ # source: MetaCyc, BRENDA, KEGG (queried 2.3.1.65)
taurochenodeoxycholate-degr/2_3.1.2.2_RXN-14289 : 1.0 chenodeoxycholoyl-CoA + 1.0 H2O --> 1.0 coenzyme_A + 1.0 chenodeoxycholate + 1.0 H+ #
source: MetaCyc, BRENDA, KEGG (queried 3.1.2.2) // other EC numbers for this reaction: 3.1.2.27, 3.1.2.20
taurochenodeoxycholate-degr/3_manual_1.1.1.-_HD-ChChol : 1.0 chenodeoxycholate + 1.0 NADP+ --> 1.0 7-oxolithocholate + 1.0 NADPH + 1.0 H+

taurocholate-degr/1_moddir_2.3.1.65_RXN-9800 : 1.0 choloyl-CoA + 1.0 taurine <=> 1.0 coenzyme_A + 1.0 taurocholate + 1.0 H+ # source:
MetaCyc, BRENDA, KEGG (queried 2.3.1.65)
taurocholate-degr/2_manual_3.1.2.2_HD-3.1.2.2 : 1.0 choloyl-CoA + 1.0 H2O --> 1.0 coenzyme_A + 1.0 cholate + 1.0 H+
taurocholate-degr/3_manual_1.1.1.-_HD-Chol : 1.0 cholate + 1.0 NADP+ --> 1.0 7-oxodeoxycholate + 1.0 NADPH + 1.0 H+

7-oxodeoxycholate_transport : 1.0 7-oxodeoxycholate + 1.0 H+ --> 1.0 7-oxodeoxycholate[ex] + H+[ex]
7-oxolithocholate_transport : 1.0 7-oxolithocholate + 1.0 H+ --> 1.0 7-oxolithocholate[ex] + H+[ex]

```

```

taurine_transport : 1.0 taurine + 1.0 H+ --> 1.0 taurine[ex] + 1.0 H+[ex]
7-oxodeoxycholate_exchange : 1.0 7-oxodeoxycholate[ex] -->
7-oxolithocholate_exchange : 1.0 7-oxolithocholate[ex] -->
taurine_exchange : 1.0 taurine[ex] -->
#####
#choline degradation

choline_exchange : 1.0 choline[ex] <=>
choline_transport : 1.0 H+[ex] + 1.0 choline[ex] <=> 1.0 H+ + 1.0 choline
trimethylamine_exchange : 1.0 trimethylamine[ex] <=>
trimethylamine_transport : 1.0 H+[ex] + 1.0 trimethylamine[ex] <=> 1.0 H+ + 1.0 trimethylamine

choline-degradation-III_4.3.99.4_RXN-13946 : 1.0 choline --> 1.0 trimethylamine + 1.0 acetaldehyde # source: MetaCyc, BRENDA, KEGG
(queried 4.3.99.4)
#####
#D-arabinose degr
D-arabinose_exchange : 1.0 D-arabinose[ex] <=>
##CDIF630erm_03311, CDIF630erm_03314; CDIF630erm_02563-CDIF630erm_02565
D-arabinose_transport_2.7.1.- : 1.0 D-arabinose[ex] + 1.0 |PTS-I-pi-phospho-L-histidines| --> 1.0 |PTS-I-Histidines| + 1.0
aldehydo-D-arabinose_5-phosphate
D-arabinose-degr_5.3.1.13_DARAB5PISOM-RXN : 1.0 aldehydo-D-arabinose_5-phosphate <=> 1.0 D-ribulose_5-phosphate # source: MetaCyc,
BRENDA, KEGG (queried 5.3.1.13)
#####
#xylose degr I/ xylan degr
#set ratio for chain length
xylan_exchange : 1.0 |Xylans|[ex] <=>
xylose_exchange : 1.0 alpha-D-xylopyranose[ex] <=>
##CDIF630erm_03350-CDIF630erm_03353
xylan_transport : 1.0 |Xylans| <=> 1.0 |Xylans|[ex]
xylose_transport_2.7.1.- : 1.0 D-xylulose_5-phosphate + 1.0 |PTS-I-Histidines| <-- 1.0 alpha-D-xylopyranose[ex] + 1.0
|PTS-I-pi-phospho-L-histidines|

xylan-degradation_3.2.1.177_RXN0-5001 : 1.0 |Xylans| + 1.0 H2O --> 1.0 alpha-D-xylopyranose # source: MetaCyc (queried 3.2.1.177)
xylose-degradation-I/1_5.3.1.5_XYLISOM-RXN : 1.0 alpha-D-xylopyranose <=> 1.0 D-xylulose # source: MetaCyc (queried 5.3.1.5)
xylose-degradation-I/2_2.7.1.17_XYLULOKIN-RXN : 1.0 ATP + 1.0 D-xylulose --> 1.0 ADP + 1.0 H+ + 1.0 D-xylulose_5-phosphate # source:
MetaCyc, BRENDA, KEGG (queried 2.7.1.17)
#####
#galactose degradation I (Leloir-pathway)
galactose_exchange : 1.0 alpha-D-galactose[ex] <=>
##CDIF630erm_00408-CDIF630erm_00413; CDIF630erm_01218, CDIF630erm_01220-CDIF630erm_01222; CDIF630erm_03576-CDIF630erm_03579?
galactose_transport_2.7.1.- : 1.0 alpha-D-galactose[ex] + 1.0 |PTS-I-pi-phospho-L-histidines| --> 1.0 |PTS-I-Histidines| +
1.0 alpha-D-galactose_1-phosphate

galactose-degr-I/1_2.7.7.12_GALACTURIDYLYLTRANS-RXN : 1.0 alpha-D-galactose_1-phosphate + 1.0 UDP-alpha-D-glucose <=> 1.0 UDP-alpha-D-galactose +
1.0 alpha-D-glucopyranose_1-phosphate # source: MetaCyc, BRENDA, KEGG (queried 2.7.7.12)
galactose-degr-I/2_5.1.3.2_UDPGLUCEPIM-RXN : 1.0 UDP-alpha-D-glucose <=> 1.0 UDP-alpha-D-galactose # source: MetaCyc, BRENDA, KEGG
(queried 5.1.3.2)
galactose-degr-I/3_spontaneous_RXN-10639 : 1.0 alpha-D-glucopyranose_1-phosphate <=> 1.0 beta-D-glucose_1-phosphate # source: MetaCyc
#####
#xylitol degr A
xylitol_exchange : 1.0 xylitol[ex] <=>
#CDIF630erm_02563-CDIF630erm_02565
xylitol_transport : 1.0 |PTS-I-pi-phospho-L-histidines| + 1.0 xylitol[ex] --> 1.0 xylitol_5-phosphate + 1.0 |
PTS-I-Histidines|
xylitol-degr_manual_1.1.1.-_HD-xyl5 : 1.0 NAD+ + 1.0 xylitol_5-phosphate <=> 1.0 D-xylulose_5-phosphate + 1.0 NADH + 1.0 H+

#xylitol degr B
##CDIF630erm_02515-CDIF630erm_02517
xylitol_transport_2.7.1.- : 1.0 |PTS-I-pi-phospho-L-histidines| + 1.0 xylitol[ex] --> 1.0 xylitol_1-phosphate + 1.0 |
PTS-I-Histidines|
xylitol-degr_manual_1.1.1.-_HD-xyl1 : 1.0 NAD+ + 1.0 xylitol_1-phosphate <=> 1.0 D-xylulose_5-phosphate + 1.0 NADH + 1.0 H+
xylulose-degradation/1_5.1.3.4_RIBULPEPIM-RXN : 1.0 L-ribulose_5-phosphate <=> 1.0 D-xylulose_5-phosphate # source: MetaCyc, BRENDA, KEGG
(queried 5.1.3.4)

```

```

#####
#arabitol degr
#arabitol degr
arabitol_exchange : 1.0 D-arabitol[ex] <=>
##CDIF630erm_02563 - CDIF630erm_02565
arabitol_transport : 1.0 |PTS-I-pi-phospho-L-histidines| + 1.0 D-arabitol[ex] --> 1.0 D-arabitol_1-phosphate +
1.0 |PTS-I-Histidines|

arabitol-degr_1.1.1.301_RXN-11106 : 1.0 D-arabitol_1-phosphate + 1.0 NAD+ <=> 1.0 H+ + 1.0 NADH + 1.0 D-xylulose_5-phosphate #
source: MetaCyc, BRENDA, KEGG (queried 1.1.1.301)
#####
#ribitol degr
ribitol_exchange : 1.0 D-ribitol[ex] <=>
##CCDIF630erm_00620-CDIF630erm_00623
ribitol_transport_2.7.1.- : 1.0 |PTS-I-pi-phospho-L-histidines| + 1.0 D-ribitol[ex] --> 1.0 D-ribitol_5-phosphate + 1.0
|PTS-I-Histidines| # source: MetaCyc (queried 2.7.1.69)

ribitol-degr_1.1.1.137_RIBITOL-5-PHOSPHATE-2-DEHYDROGENASE-RXN_WOP : 1.0 D-ribitol_5-phosphate + 1.0 NAD+ <=> 1.0 H+ + 1.0 D-ribulose_5-phosphate + 1.0 NADH #
source: MetaCyc, BRENDA, KEGG (queried 1.1.1.137)
#####
#D-sorbitol degradation II
D-sorbitol_exchange : 1.0 D-sorbitol[ex] <=>
##CDIF630erm_00882-CDIF630erm_00885
D-sorbitol_transport_2.7.1.198 : 1.0 D-sorbitol[ex] + 1.0 |PTS-I-pi-phospho-L-histidines| --> 1.0 D-sorbitol_6-phosphate +
1.0 |PTS-I-Histidines|

D-sorbitol-degradation-II_1.1.1.140_SORB6PDEHYDROG-RXN : 1.0 NAD+ + 1.0 D-sorbitol_6-phosphate <=> 1.0 beta-D-fructofuranose_6-phosphate + 1.0 NADH +
1.0 H+ # source: MetaCyc, BRENDA, KEGG (queried 1.1.1.140)

sorbitol-biosyn_1.1.1.17_BS257116 : 1.0 NAD+ + 1.0 D-sorbitol_6-phosphate <-- 1.0 NADH + 1.0 H+ + 1.0 D-glucose_6-phosphate #
source: BRENDA (queried 1.1.1.17)
#####
#mannitol degradation I
D-mannitol_exchange : 1.0 D-mannitol[ex] <=>
##CDIF630erm_02571, CDIF630erm_02573
mannitol_transport_2.7.1.197 : 1.0 |PTS-I-pi-phospho-L-histidines| + 1.0 D-mannitol[ex] --> 1.0 D-mannitol_1-phosphate +
1.0 |PTS-I-Histidines|

mannitol-degradation-I_1.1.1.17_MANNPDEHYDROG-RXN : 1.0 NAD+ + 1.0 D-mannitol_1-phosphate <=> 1.0 NADH + 1.0 H+ + 1.0 beta-D-fructofuranose_6-
phosphate # source: MetaCyc, BRENDA, KEGG (queried 1.1.1.17)
#####
#D-ribofuranose and 2'-deoxyribose degr C
D-ribopyranose_exchange : 1.0 beta-D-ribopyranose[ex] <=>
2'-deoxyribose_exchange : 1.0 2'-deoxyribose[ex] <=>
##CDIF630erm_00425-CDIF630erm_00427
D-ribopyranose_transport : 1.0 ATP + 1.0 H2O + 1.0 beta-D-ribopyranose[ex] --> 1.0 ADP + 1.0 phosphate + 1.0 H+ + 1.0
beta-D-ribopyranose
2'-deoxyribose_transport : 1.0 ATP + 1.0 H2O + 1.0 2'-deoxyribose[ex] --> 1.0 ADP + 1.0 phosphate + 1.0 H+ + 1.0 2'-
deoxyribose

2'-deoxyribose-degradation_2.7.1.15_RXN-14223 : 1.0 2'-deoxyribose + 1.0 ATP --> 1.0 H+ + 1.0 ADP + 1.0 2-deoxy-D-ribose_5-phosphate #
source: MetaCyc, BRENDA, KEGG (queried 2.7.1.15)
#####
#maltose degradation
maltose_exchange : 1.0 alpha-maltose[ex] <=>
##CDIF630erm_00981-CDIF630erm_00983;CDIF630erm_02759, CDIF630erm_02761; CDIF630erm_03341, CDIF630erm_03344
maltose_transport_2.7.1.208 : 1.0 alpha-maltose[ex] + 1.0 |PTS-I-pi-phospho-L-histidines| --> 1.0 alpha-maltose_6'-
phosphate + 1.0 |PTS-I-Histidines|

maltose-degr_3.2.1.122_MALTOSE-6-PHOSPHATE-GLUCOSIDASE-RXN : 1.0 H2O + 1.0 alpha-maltose_6'-phosphate --> 1.0 D-glucose + 1.0 D-glucose_6-phosphate #
source: MetaCyc, BRENDA, KEGG (queried 3.2.1.122)
#####
#sucrose degradation I
sucrose_exchange : 1.0 sucrose[ex] <=>

```

```

##CDIF630erm_00597
sucrose_transport : 1.0 |PTS-I-pi-phospho-L-histidines| + 1.0 sucrose[ex] --> 1.0 sucrose_6-phosphate + 1.0 |
PTS-I-Histidines|

sucrose-degradation-I/1_3.2.1.B3_BR49793 : 1.0 sucrose_6-phosphate + 1.0 H2O --> 1.0 beta-D-fructofuranose + 1.0 alpha-D-glucose_6-
phosphate # source: BRENDA, KEGG (queried 3.2.1.B3) // other EC numbers for this reaction: 3.2.1.26
sucrose-degradation-I/2a_2.7.1.4_FRUCTOKINASE-RXN : 1.0 ATP + 1.0 beta-D-fructofuranose --> 1.0 ADP + 1.0 beta-D-fructofuranose_6-phosphate +
1.0 H+ # source: MetaCyc, KEGG (queried 2.7.1.4) // other EC numbers for this reaction: 2.7.1.1
sucrose-degradation-I/2b_5.3.1.5_BS1055 : 1.0 D-glucose <-- 1.0 beta-D-fructofuranose # source: BRENDA, KEGG (queried 5.3.1.5)

glucose-iso_5.3.1.9_R02740 : 1.0 alpha-D-glucose_6-phosphate <=> 1.0 beta-D-fructofuranose_6-phosphate # source: KEGG
(queried 5.3.1.9)
glucose-iso_5.1.3.15_5.3.1.9_spontaneous_GLUCOSE-6-PHOSPHATE-1-EPIMERASE-RXN : 1.0 alpha-D-glucose_6-phosphate <=> 1.0 beta-D-glucose_6-phosphate # source: MetaCyc,
BRENDA, KEGG (queried 5.1.3.15, 5.3.1.9)
#####
#D-tagatose degradation
D-tagatose_exchange : 1.0 D-tagatose[ex] <=>
##CDIF630erm_03358
D-tagatose_transport : 1.0 D-tagatose[ex] + 1.0 |PTS-I-pi-phospho-L-histidines| --> 1.0 |PTS-I-Histidines| + 1.0 D-
tagatose_1-phosphate
#CDIF630erm_03359
D-tagatose-degr/1_manual_2.7.1.-_HD-tag : 1.0 D-tagatose_1-phosphate + 1.0 ATP --> 1.0 H+ + 1.0 ADP + 1.0 D-tagatofuranose_1,6-
bisphosphate
D-tagatose-degr/_4.1.2.40_TAGAALDOL-RXN : 1.0 D-tagatofuranose_1,6-bisphosphate <=> 1.0 D-glyceraldehyde_3-phosphate + 1.0
glycerone_phosphate # source: MetaCyc, BRENDA, KEGG (queried 4.1.2.40)
#####
#fructose degr
D-fructofuranose_exchange : 1.0 beta-D-fructofuranose[ex] <=>
##CDIF630erm_02503
fructose_transport_2.7.1.202 : 1.0 |PTS-I-pi-phospho-L-histidines| + 1.0 beta-D-fructofuranose[ex] --> 1.0 beta-D-
fructofuranose_1-phosphate + 1.0 |PTS-I-Histidines|
fructose-degradation_2.7.1.56_1PFRUCTPHOSN-RXN : 1.0 beta-D-fructofuranose_1-phosphate + 1.0 ATP --> 1.0 ADP + 1.0 fructose_1,6-bisphosphate
+ 1.0 H+ # source: MetaCyc, BRENDA (queried 2.7.1.56)
#####
#alternative 1-deoxy-D-xylulose_5-phosphate biosynthesis
1-deoxy-D-xylulose_5-phosphate-biosyn/1_4.1.2.13_RXN-8631 : 1.0 beta-D-fructofuranose_1-phosphate --> 1.0 D-glyceraldehyde + 1.0 glycerone_phosphate #
source: MetaCyc, BRENDA (queried 4.1.2.13)
1-deoxy-D-xylulose_5-phosphate-biosyn/2a_1.2.1.3_BS426217 : 1.0 D-glyceraldehyde + 1.0 NAD+ + 1.0 H2O <=> 1.0 NADH + 1.0 D-glycerate + 1.0 H+ # source:
BRENDA, KEGG (queried 1.2.1.3)
1-deoxy-D-xylulose_5-phosphate-biosyn/2b_2.2.1.7_BS260855 : 1.0 D-glyceraldehyde + 1.0 pyruvate --> 1.0 CO2 + 1.0 1-deoxy-D-xylulose # source: BRENDA
(queried 2.2.1.7)
1-deoxy-D-xylulose_5-phosphate-biosyn/3_2.7.1.17_RXN0-382 : 1.0 1-deoxy-D-xylulose + 1.0 ATP --> 1.0 ADP + 1.0 1-deoxy-D-xylulose_5-phosphate + 1.0 H+
# source: MetaCyc, BRENDA (queried 2.7.1.17) // other EC numbers for this reaction: 2.7.1
#####
#cellobiose degr C
D-cellobiose_exchange : 1.0 beta-D-cellobiose[ex] <=>
##CDIF630erm_03148; CDIF630erm_03151; CDIF630erm_03151
cellobiose_transport_2.7.1.205 : 1.0 beta-D-cellobiose[ex] + 1.0 |PTS-I-pi-phospho-L-histidines| --> 1.0 6-phospho-beta-D-
glucosyl-(1,4)-D-glucose + 1.0 |PTS-I-Histidines|
cellobiose-degr_3.2.1.86_6-PHOSPHO-BETA-GLUCOSIDASE-RXN : 1.0 6-phospho-beta-D-glucosyl-(1,4)-D-glucose + 1.0 H2O --> 1.0 D-glucose + 1.0 D-glucose_6-
phosphate # source: MetaCyc, BRENDA, KEGG (queried 3.2.1.86)
#####
#chitobiose degradation
chitobiose_exchange : 1.0 N,N'-diacetylchitobiose[ex] <=>
##CDIF630erm_03148; CDIF630erm_03151; CDIF630erm_03151
chitobiose_transport_2.7.1.196 : 1.0 N,N'-diacetylchitobiose[ex] + 1.0 |PTS-I-pi-phospho-L-histidines| --> 1.0 |PTS-I-
Histidines| + 1.0 N,N'-diacetylchitobiose_6'-phosphate # source: MetaCyc (queried 2.7.1.69)

chitobiose-degradation_3.5.1.105_RXN0-7001 : 1.0 H2O + 1.0 N,N'-diacetylchitobiose_6'-phosphate --> 1.0 acetate + 1.0 N-
monoacetylchitobiose_6'-phosphate # source: MetaCyc (queried 3.5.1.105)
chitobiose-degradation_3.2.1.86_RXN0-7002 : 1.0 H2O + 1.0 N-monoacetylchitobiose_6'-phosphate --> 1.0 N-acetyl-D-glucosamine_6-phosphate
+ 1.0 D-glucosamine # source: MetaCyc (queried 3.2.1.86)
#assumed to be side reaction of 2.7.1.59
chitobiose-degradation_2.7.1.59_GLUCOSAMINE-KINASE-RXN : 1.0 D-glucosamine + 1.0 ATP --> 1.0 D-glucosamine_6-phosphate + 1.0 ADP + 1.0 H+ # source:

```

```

MetaCyc, BRENDA, KEGG (queried 2.7.1.8) // other EC numbers for this reaction: 2.7.1.1
#####
#trehalose degr I
trehalose_exchange : 1.0 alpha,alpha-trehalose[ex] <=>
#CDIF630erm_03371-CDIF630erm_03372?
trehalose_transport : 1.0 |PTS-I-pi-phospho-L-histidines| + 1.0 alpha,alpha-trehalose[ex] --> 1.0 |PTS-I-
Histidines| + 1.0 alpha,alpha-trehalose_6-phosphate

trehalose-degr-I_3.2.1.122_3.2.1.93_TRE6PHYDRO-RXN : 1.0 alpha,alpha-trehalose_6-phosphate + 1.0 H2O --> 1.0 D-glucose_6-phosphate + 1.0 D-
glucose # source: MetaCyc, BRENDA, KEGG (queried 3.2.1.122, 3.2.1.93)
#####
#sugars polymers

cyclodextrin_exchange : 1.0 |Cyclodextrins|[ex] <=>
starch_exchange : 1.0 |Starch|[ex] <=>
maltodextrin_exchange : 1.0 |Maltodextrin|[ex] <=>
pullulan_exchange : 1.0 |Pullulans|[ex] <=>
maltotriose_exchange : 1.0 maltotriose[ex] <=>

cyclodextrin-degr_3.2.1.54_CYCLOMALTODEXTRINASE-RXN : 1.0 H2O + 1.0 |Cyclodextrins|[ex] --> 1.0 |Maltodextrins|[ex] # source: MetaCyc, BRENDA,
KEGG (queried 3.2.1.54) // other EC numbers for this reaction: 2.4.1.19
starch-degr_manual_2.4.1.18_3.2.1.41_3.2.1.1_HD-starch : 1.0 |Starch|[ex] + 1.0 H2O[ex] --> 1.0 |Maltodextrins|[ex]
maltodextrin-degr_3.2.1.133_3.2.1.1_RXN-12188 : 1.0 |Maltodextrins|[ex] + 1.0 H2O[ex] --> 1.0 D-glucose[ex] + 1.0 alpha,alpha-trehalose[ex]
# source: MetaCyc, BRENDA (queried 3.2.1.133, 3.2.1.1) // there are 4 more EC numbers for this reaction
pullulan-degr_3.2.1.54_3.2.1.41_RXN-12302 : 1.0 |Pullulans|[ex] + 1.0 H2O[ex] --> 2.0 maltotriose[ex] # source: MetaCyc, BRENDA
(queried 3.2.1.54, 3.2.1.41) // other EC numbers for this reaction: 3.2.1.135
maltotriose-degr_modnames_3.2.1.10_R06199 : 2.0 H2O + 1.0 maltotriose[ex] --> 3.0 D-glucose[ex] # source: KEGG (queried 3.2.1.10) //
other EC numbers for this reaction: 3.2.1.3
#####
#N-acetylneuraminate and N-acetylmannosamine degradation
N-acetylneuraminate_exchange : 1.0 N-acetylneuraminate[ex] <=>
##CDIF630erm_02472
N-acetylneuraminate_transport : 1.0 N-acetyl-beta-neuraminate + 1.0 Na+ <=> 1.0 N-acetylneuraminate[ex] + 1.0 Na+[ex]

N-acetylneur-degr/1_4.1.3.3_ACNEULY-RXN : 1.0 N-acetyl-beta-neuraminate <=> 1.0 |N-acetyl-D-mannosamine| + 1.0 pyruvate # source:
MetaCyc, BRENDA, KEGG (queried 4.1.3.3)
N-acetylneur-degr/2_2.7.1.59_NANK-RXN : 1.0 ATP + 1.0 |N-acetyl-D-mannosamine| --> 1.0 ADP + 1.0 N-acetyl-D-mannosamine_6-phosphate
+ 1.0 H+ # source: MetaCyc, BRENDA, KEGG (queried 2.7.1.59) // other EC numbers for this reaction: 2.7.1.60
N-acetylneur-degr/3_5.1.3.9_NANE-RXN : 1.0 N-acetyl-D-mannosamine_6-phosphate <=> 1.0 N-acetyl-D-glucosamine_6-phosphate # source:
MetaCyc, BRENDA, KEGG (queried 5.1.3.9)
#####
#D-galactosamine and N-acetyl-D-galactosamine degradation
N-acetyl-D-galactosamine_exchange : 1.0 |N-acetyl-D-galactosamine|[ex]<=>
D-galactosamine_exchange : 1.0 D-galactosamine[ex] <=>
##CDIF630erm_00408-CDIF630erm_00413; CDIF630erm_01218, CDIF630erm_01220-CDIF630erm_01222; CDIF630erm_03576-CDIF630erm_03579?
N-acetyl-D-galactosamine_transport : 1.0 |PTS-I-pi-phospho-L-histidines| + 1.0 |N-acetyl-D-galactosamine| --> 1.0 |PTS-I-
Histidines| + 1.0 N-acetyl-D-galactosamine_6-phosphate
D-galactosamine_transport : 1.0 D-Galactosamine[ex] + 1.0 |PTS-I-pi-phospho-L-histidines| --> 1.0 D-galactosamine_6-
phosphate + 1.0 |PTS-I-Histidines| # source: MetaCyc (queried 2.7.1.69)

(N-acetyl-)D-galactosamine-degr/1_3.5.1.25_3.5.1.80-RXN : 1.0 N-acetyl-D-galactosamine_6-phosphate + 1.0 H2O --> 1.0 acetate + 1.0 D-galactosamine_6-
phosphate # source: MetaCyc, BRENDA, KEGG (queried 3.5.1.25)
(N-acetyl-)D-galactosamine-degr/2_5.3.1.-_RXN-13548 : 1.0 D-galactosamine_6-phosphate + 1.0 H2O --> 1.0 ammonium + 1.0 D-tagatofuranose_6-
phosphate # source: MetaCyc, KEGG (queried 5.3.1.-) // other EC numbers for this reaction: 5.3.1, 3.5.99
(N-acetyl-)D-galactosamine-degr/3_2.7.1.11_2.7.1.144_2.7.1.56_TAGAKIN-RXN : 1.0 D-tagatofuranose_6-phosphate + 1.0 ATP --> 1.0 ADP + 1.0 H+ + 1.0 D-tagatofuranose_1,6-
bisphosphate # source: MetaCyc, BRENDA, KEGG (queried 2.7.1.11, 2.7.1.144, 2.7.1.56)
#####
#D-glucosaminatate-degradation
D-glucosaminatate_exchange : 1.0 D-glucosaminatate[ex] <=>
##CDIF630erm_00408-CDIF630erm_00413; CDIF630erm_01218, CDIF630erm_01220-CDIF630erm_01222; CDIF630erm_03576-CDIF630erm_03579?
D-glucosaminatate_transport : 1.0 |PTS-I-pi-phospho-L-histidines| + 1.0 D-glucosaminatate[ex] --> 1.0 D-glucosaminatate_6-
phosphate + 1.0 |PTS-I-Histidines| # source: MetaCyc (queried 2.7.1.69)

D-glucosaminatate-degr/1_4.3.1.29_RXN-14730 : 1.0 D-glucosaminatate_6-phosphate --> 1.0 ammonium + 1.0 2-dehydro-3-deoxy-D-gluconate_6-

```

```

phosphate # source: MetaCyc, BRENDA, KEGG (queried 4.3.1.29)
D-glucosamine-degr/2_2.7.1.45_DEOXYGLUCONOKIN-RXN : 1.0 2-dehydro-3-deoxy-D-gluconate + 1.0 ATP --> 1.0 ADP + 1.0 2-dehydro-3-deoxy-D-
gluconate_6-phosphate + 1.0 H+ # source: MetaCyc, BRENDA, KEGG (queried 2.7.1.45) // other EC numbers for this reaction: 2.7.1.178
D-glucosamine-degr/3_4.1.2.14_KDPGALDOL-RXN : 1.0 2-dehydro-3-deoxy-D-gluconate_6-phosphate --> 1.0 pyruvate + 1.0 D-glyceraldehyde_3-
phosphate # source: MetaCyc, BRENDA, KEGG (queried 4.1.2.14) // other EC numbers for this reaction: 4.1.2.20, 4.1.2.55
#####
#2-0-alpha-mannosyl-D-glycerate degradation C
2-0-alpha-mannosyl-D-glycerate_exchange : 1.0 2-0-alpha-mannosyl-D-glycerate[ex] <=>
##CDIF630erm_03369; CDIF630erm_02819-CDIF630erm_02821
2-0-alpha-mannosyl-D-glycerate_transport_2.7.1.195 : 1.0 2-0-alpha-mannosyl-D-glycerate[ex] + 1.0 |PTS-I-pi-phospho-L-histidines| --> 1.0 2-0-(6-
phospho-alpha-D-mannosyl)-D-glycerate + 1.0 |PTS-I-Histidines| # source: MetaCyc (queried 2.7.1.69)

2-0-alpha-mannosyl-D-glycerate-degr_3.2.1.170_RXN0-5216 : 1.0 H2O + 1.0 2-0-(6-phospho-alpha-D-mannosyl)-D-glycerate --> 1.0 D-glycerate + 1.0 D-
mannopyranose_6-phosphate # source: MetaCyc (queried 3.2.1.170)
#####
#altronate and 2-dehydro-3-deoxy-D-gluconate degradation
D-altronate_exchange : 1.0 D-altronate <=>
2-dehydro-3-deoxy-D-gluconate_exchange : 1.0 2-dehydro-3-deoxy-D-gluconate <=>
##CDIF630erm_03138
2-dehydro-3-deoxy-D-gluconate_transport : 1.0 2-dehydro-3-deoxy-D-gluconate + 1.0 Na+ <=> 1.0 2-dehydro-3-deoxy-D-gluconate[ex] + 1.0
Na+[ex]
D-altronate_transport : 1.0 D-altronate + 1.0 Na+ <=> 1.0 D-altronate[ex] + 1.0 Na+[ex]
D-altronate-degr_4.2.1.7_ALTRODEHYDRAT-RXN : 1.0 D-altronate --> 1.0 H2O + 1.0 2-dehydro-3-deoxy-D-gluconate # source: MetaCyc, BRENDA,
KEGG (queried 4.2.1.7)
#####
riboflavin_exchange : 1.0 riboflavin[ex] <=>
##CDIF630erm_00266
riboflavin_transport : 1.0 H2O + 1.0 ATP + 1.0 riboflavin[ex] --> 1.0 H+ + 1.0 phosphate + 1.0 ADP + 1.0 riboflavin
#####
#adenosylcobalamin salvage from cobinamide
cobinamide_exchange : 1.0 cobinamide[ex] <=>
coenzyme-B12_exchange : 1.0 adenosylcobalamin[ex] <=>

coenzyme-B12_transport_3.6.3.33 : 1.0 ATP + 1.0 adenosylcobalamin[ex] + 1.0 H2O --> 1.0 ADP + 1.0 phosphate + 1.0 adenosylcobalamin +
1.0 H+ # source: BRENDA (queried 3.6.3.33)
cobinamide_transport_3.6.3.33 : 1.0 ATP + 1.0 cobinamide[ex] + 1.0 H2O --> 1.0 ADP + 1.0 phosphate + 1.0 cobinamide + 1.0 H+ #
source: BRENDA (queried 3.6.3.33)

adenosylcobalamin-salvage-from-cobinamide/1_2.5.1.17_BTUR2-RXN : 1.0 ATP + 1.0 cobinamide --> 1.0 adenosylcobinamide + 1.0 PPPi # source: MetaCyc, BRENDA, KEGG
(queried 2.5.1.17)
adenosylcobalamin-salvage-from-cobinamide/2_2.7.1.156_COBINAMIDEKIN-RXN : 1.0 adenosylcobinamide + 1.0 ATP --> 1.0 ADP + 1.0 adenosyl-cobinamide_phosphate + 1.0 H+ # source:
MetaCyc, BRENDA, KEGG (queried 2.7.1.156)
#####
#dethiobiotin
dethiobiotin_exchange : 1.0 dethiobiotin[ex] <=>
##CDIF630erm_03256
dethiobiotin_transport : 1.0 ATP + 1.0 dethiobiotin[ex] + 1.0 H2O --> 1.0 ADP + 1.0 phosphate + 1.0 dethiobiotin + 1.0 H+ # source:
BRENDA (queried 3.6.3.33)

biotin-biosynthesis_2.8.1.7_RXN-12588 : 1.0 |Unulfurated-Sulfur-Acceptors| + 1.0 L-cysteine --> 1.0 |Sulfurated-Sulfur-Acceptors| + 1.0 L-alanine
# source: MetaCyc (queried 2.8.1.7)
biotin-biosynthesis_modnames_2.8.1.6_2.8.1.6-RXN : 1.0 |Sulfurated-Sulfur-Acceptors| + 2.0 |Reduced-Ferredoxins| + 2.0 S-adenosyl-L-methionine + 1.0
dethiobiotin --> 2.0 L-methionine + 2.0 5'-deoxyadenosine + 1.0 biotin + 1.0 |Unulfurated-Sulfur-Acceptors| + 2.0 |Oxidized-Ferredoxins| # source: MetaCyc (queried 2.8.1.6)
#####
#formylaminopyrimidine
formylaminopyrimidine_exchange : 1.0 formylaminopyrimidine[ex] <=>
formylaminopyrimidine_transport : 1.0 ATP + 1.0 formylaminopyrimidine[ex] + 1.0 H2O --> 1.0 ADP + 1.0 phosphate + 1.0 formylaminopyrimidine
+ 1.0 H+ # source: BRENDA (queried 3.6.3.33)

base-degraded-thiamine-salvage_3.5.1.-_RXN-12612 : 1.0 formylaminopyrimidine + 1.0 H2O --> 1.0 aminomethylpyrimidine + 1.0 formate # source: MetaCyc
(queried 3.5.1.-) // other EC numbers for this reaction: 3.5.1
base-degraded-thiamine-salvage_3.5.99.2_RXN-12613 : 1.0 H2O + 1.0 aminomethylpyrimidine --> 1.0 4-amino-2-methyl-5-pyrimidinemethanol + 1.0 ammonium #
source: MetaCyc, BRENDA, KEGG (queried 3.5.99.2)
#####

```

```

#sulfolactate
sulfolactate_exchange : 1.0 (2R)-3-sulfolactate <=>
##CDIF630erm_03289
sulfolactate_transport : 1.0 (2R)-3-sulfolactate + 1.0 Na+ <=> 1.0 (2R)-3-sulfolactate[ex] + 1.0 Na+[ex]

sulfolactate-degr/1_4.4.1.24_RXN-11691 : 1.0 (2R)-3-sulfolactate --> 1.0 H+ + 1.0 pyruvate + 1.0 sulfite # source: MetaCyc, BRENDA (queried
4.4.1.24)
sulfolactate-degr/2_spontaneous_RXN-8315 : 1.0 H+ + 1.0 sulfite <=> 1.0 hydrogen_sulfite # source: MetaCyc
#####
#cyclic_di-3',5'-guanylate
cGDP_2.7.7.65_RXN0-5359 : 2.0 GTP --> 2.0 diphosphate + 1.0 cyclic_di-3',5'-guanylate # source: MetaCyc, BRENDA, KEGG (queried
2.7.7.65)
cGDP_3.1.4.52_RXN0-4181 : 1.0 H2O + 1.0 cyclic_di-3',5'-guanylate --> 1.0 H+ + 1.0 linear_dimeric_GMP # source: MetaCyc, BRENDA,
KEGG (queried 3.1.4.52)
#####

#Reactions without pathway
#####1.1.1.1#####
-no-pathway_1.1.1.1_RXN-6021 : 1.0 NAD+ + 1.0 choline --> 1.0 NADH + 1.0
betaine_aldehyde + 1.0 H+ # source: MetaCyc, KEGG (queried 1.1.1.1) // other EC numbers for this reaction: 1.1.1
-no-pathway_1.1.1.1_RXN-12582 : 1.0 choline + 1.0 NADP+ <=> 1.0 betaine_aldehyde + 1.0
NADPH + 1.0 H+ # source: MetaCyc, KEGG (queried 1.1.1.1) // other EC numbers for this reaction: 1.1.1
#####1.1.1.22#####
-no-pathway_1.1.1.22_UGD-RXN : 2.0 NAD+ + 1.0 UDP-alpha-D-glucose + 1.0 H2O --> 1.0 UDP-
alpha-D-glucuronate + 3.0 H+ + 2.0 NADH # source: MetaCyc, BRENDA, KEGG (queried 1.1.1.22)
#####1.2.1.3#####
-no-pathway_1.2.1.3_RXN-4142 : 1.0 H2O + 1.0 NAD+ + 1.0 |Fatty-Aldehydes| --> 1.0 |
Fatty-Acids| + 2.0 H+ + 1.0 NADH # source: MetaCyc, BRENDA (queried 1.2.1.3) // other EC numbers for this reaction: 1.2.1.48
-no-pathway_1.2.1.3_AMINOBUTDEHYDROG-RXN : 1.0 NAD+ + 1.0 4-aminobutanal + 1.0 H2O --> 1.0 4-
aminobutanoate + 2.0 H+ + 1.0 NADH # source: MetaCyc, BRENDA, KEGG (queried 1.2.1.3) // other EC numbers for this reaction: 1.2.1.19, 1.2.1
#####1.1.1.86#####
-no-pathway_1.1.1.86_R04440 : 1.0 (2R)-2,3-dihydroxy-3-methylbutanoate + 1.0 NADP+ <=>
1.0 NADPH + 1.0 H+ + 1.0 3-hydroxy-3-methyl-2-oxobutanoate # source: KEGG (queried 1.1.1.86)
#####1.5.1.49#####
-no-pathway_1.5.1.49_PYRROLINE-2-CARBOXYLATE-REDUCTASE-RXN : 1.0 L-proline + 1.0 NADP+ <-- 2.0 H+ + 1.0 1-pyrroline-2-
carboxylate + 1.0 NADPH # source: MetaCyc, BRENDA, KEGG (queried 1.5.1.49) // other EC numbers for this reaction: 1.5.1.1, 1.5.1.21
-no-pathway_1.5.1.49_PYRROLINE-2-CARBOXYLATE-REDUCTASE-RXN_WOP : 1.0 L-proline + 1.0 NAD+ <=> 2.0 H+ + 1.0 NADH + 1.0 1-
pyrroline-2-carboxylate # source: MetaCyc, BRENDA, KEGG (queried 1.5.1.49) // other EC numbers for this reaction: 1.5.1.1
#####1.8.1.14#####
-no-pathway_1.8.1.14_COA-DISULFIDE-REDUCTASE-NADH-RXN : 1.0 NADP+ + 2.0 coenzyme_A <=> 1.0 CoA-disulfide + 1.0 H+
+ 1.0 NADPH # source: MetaCyc, BRENDA, KEGG (queried 1.8.1.14)
#####2.1.1.79#####
-no-pathway_2.1.1.79_2.1.1.79-RXN : 1.0 S-adenosyl-L-methionine + 1.0 |Phospholipid-Olefinic-
Fatty-Acids| --> 1.0 H+ + 1.0 S-adenosyl-L-homocysteine + 1.0 |Phospholipid-Cyclopropane-Fatty-Acids| # source: MetaCyc (queried 2.1.1.79)
#####2.3.1.181#####
-no-pathway_2.3.1.181_RXN0-947 : 1.0 |Octanoyl-ACPs| + 1.0 |Lipoyl-Protein-L-Lysine| -->
1.0 |Octanoylated-domains| + 1.0 Acyl-carrier_protein + 1.0 H+ # source: MetaCyc (queried 2.3.1.181)
#####2.3.1.79#####
-no-pathway_2.3.1.79_MALTACETYLTRAN-RXN : 1.0 acetyl-CoA + 1.0 alpha,alpha-trehalose <=> 1.0
coenzyme_A + 1.0 6-O-acetyl-alpha-D-glucopyranosyl-(1arr4)-D-glucose # source: MetaCyc, BRENDA, KEGG (queried 2.3.1.79)
#####2.5.1.17#####
-no-pathway_2.5.1.17_COBALADENOSYLTRANS-RXN : 1.0 cob(I)alamin + 1.0 ATP --> 1.0 adenosylcobalamin +
1.0 PPPi # source: MetaCyc, BRENDA, KEGG (queried 2.5.1.17)
#####2.5.1.49#####
-no-pathway_2.5.1.49_0-ACETYLMOMOSERINE-THIOL-LYASE-RXN : 1.0 methanethiol + 1.0 0-acetyl-L-homoserine --> 1.0
acetate + 1.0 L-methionine + 1.0 H+ # source: MetaCyc, BRENDA, KEGG (queried 2.5.1.49)
#####2.7.1.33#####
-no-pathway_2.7.1.33_PANTETHEINE-KINASE-RXN : 1.0 pantetheine + 1.0 ATP --> 1.0 ADP + 1.0 4'-
phosphopantetheine + 1.0 H+ # source: MetaCyc, BRENDA, KEGG (queried 2.7.1.33) // other EC numbers for this reaction: 2.7.1.34
-no-pathway_2.7.1.33_R04391 : 1.0 ATP + 1.0 N-[(R)-pantothenoyl]-L-cysteine --> 1.0 R-
4'-phosphopantothenoyl-L-cysteine + 1.0 ADP # source: KEGG (queried 2.7.1.33)
#####2.7.1.49#####
-no-pathway_2.7.1.49_2.7.1.35_PYRAMKIN-RXN : 1.0 pyridoxamine + 1.0 ATP --> 1.0 H+ + 1.0 ADP + 1.0

```



```

pyridoxamine_5'-phosphate # source: MetaCyc, BRENDA, KEGG (queried 2.7.1.49, 2.7.1.35)
~no-pathway_2.7.1.35_PYRIDOXKIN-RXN : 1.0 pyridoxal + 1.0 ATP --> 1.0 H+ + 1.0 ADP + 1.0
pyridoxal_5'-phosphate # source: MetaCyc, BRENDA, KEGG (queried 2.7.1.35)
#####2.7.1.66#####
~no-pathway_2.7.1.66_UNDECAPRENOL-KINASE-RXN : 1.0 di-trans,octa-cis-undecaprenol + 1.0 ATP --> 1.0 ADP
+ 1.0 di-trans,octa-cis-undecaprenyl_phosphate + 1.0 H+ # source: MetaCyc, BRENDA, KEGG (queried 2.7.1.66)
#####2.7.7.85#####
~no-pathway_2.7.7.85_RXN-14338 : 2.0 ATP <=> 1.0 cyclic_di-3',5'-adenylate + 2.0
diphosphate # source: MetaCyc, BRENDA, KEGG (queried 2.7.7.85)
#####2.7.8.40#####
~no-pathway_2.7.8.40_RXN-14571 : 1.0 di-trans,octa-cis-undecaprenyl_phosphate + 1.0 UDP-N-
acetyl-alpha-D-galactosamine <=> 1.0 N-acetyl-alpha-D-galactosaminyl-diphospho-ditrans,octacis-undecaprenol + 1.0 UMP # source: MetaCyc, BRENDA, KEGG (queried 2.7.8.40) // other
EC numbers for this reaction: 2.7.8.6
#####2.7.8.7#####
~no-pathway_2.7.8.7_HOLO-ACP-SYNTH-RXN : 1.0 [apo-ACP] + 1.0 coenzyme_A --> 1.0 adenosine_3',5'-
bisphosphate + 1.0 Acyl-carrier_protein + 1.0 H+ # source: MetaCyc, KEGG (queried 2.7.8.7) // other EC numbers for this reaction: 2.7.8
#####3.1.3.18#####
photorespiration_3.1.3.18_GPH-RXN : 1.0 H2O + 1.0 2-phosphoglycolate --> 1.0 glycolate + 1.0
phosphate # source: MetaCyc, BRENDA, KEGG (queried 3.1.3.18)
#####3.1.4.46#####
~no-pathway_3.1.4.46_RXN-14073 : 1.0 glycerophosphoglycerol + 1.0 H2O --> 1.0 sn-
glycerol_3-phosphate + 1.0 glycerol + 1.0 H+ # source: MetaCyc, BRENDA (queried 3.1.4.46)
#####3.2.1.10#####
~no-pathway_3.2.1.10_3.2.1.10-RXN : 1.0 beta-isomaltose + 1.0 H2O --> 2.0 D-glucose #
source: MetaCyc (queried 3.2.1.10)
#####3.2.1.133#####
~no-pathway_3.2.1.133_3.2.1.133-RXN : 1.0 H2O + 1.0 [Starch] --> 1.0 alpha-maltose # source:
MetaCyc (queried 3.2.1.133)
#####3.2.1.37#####
~no-pathway_3.2.1.37_3.2.1.37-RXN : 1.0 H2O + 1.0 [1-4-D-xylooligosaccharides] --> 1.0 beta-
D-xylopyranose # source: MetaCyc (queried 3.2.1.37)
#####3.6.1.13#####
~no-pathway_3.6.1.13_RXN0-1441 : 1.0 H2O + 1.0 ADP-D-ribose --> 2.0 H+ + 1.0 AMP + 1.0 D-
ribose_5-phosphate # source: MetaCyc, BRENDA, KEGG (queried 3.6.1.13) // other EC numbers for this reaction: 3.6.1, 3.6.1.53, 3.6.1.21
#####4.1.2.17#####
lactate-biosynthesis_fucose-degradation_4.1.2.17_FUCPALDOL-RXN : 1.0 L-fucose_1-phosphate <=> 1.0 (S)-lactaldehyde + 1.0
glycerone_phosphate # source: MetaCyc, BRENDA, KEGG (queried 4.1.2.17)
#####4.1.3.16#####
~no-pathway_4.1.3.16_RXN-13990 : 1.0 (4S)-4-hydroxy-2-oxoglutarate <=> 1.0 glyoxylate +
1.0 pyruvate # source: MetaCyc, BRENDA, KEGG (queried 4.1.3.16) // other EC numbers for this reaction: 4.1.3.42
#####5.1.1.13#####
~no-pathway_5.1.1.13 ASPARTATE-RACEMASE-RXN : 1.0 L-aspartate <=> 1.0 D-aspartate # source: MetaCyc,
BRENDA, KEGG (queried 5.1.1.13)
#####5.1.1.21#####
~no-pathway_5.1.1.21_RXN-16430 : 1.0 L-isoleucine <=> 1.0 D-allo-isoleucine # source:
MetaCyc, BRENDA, KEGG (queried 5.1.1.21)
#####5.1.3.14#####
~metabolism-of-biosynthesis_5.1.3.14_UDPGLCNACEPIM-RXN : 1.0 UDP-N-acetyl-alpha-D-glucosamine <=> 1.0 UDP-N-
acetyl-alpha-D-mannosamine # source: MetaCyc, BRENDA, KEGG (queried 5.1.3.14)
#####5.4.3.9#####
~no-pathway_5.4.3.9_RXN-13569 : 1.0 L-glutamate <=> 1.0 beta-glutamate # source:
MetaCyc, BRENDA, KEGG (queried 5.4.3.9)
#####6.1.1.13#####
~no-pathway_6.1.1.13_6.1.1.13-RXN : 1.0 ATP + 1.0 Poly(ribitol_phosphate) + 1.0 D-alanine -->
1.0 H+ + 1.0 diphosphate + 1.0 O-D-Alanyl-poly(ribitol_phosphate) + 1.0 AMP # source: MetaCyc, BRENDA, KEGG (queried 6.1.1.13)
#####
#Generic
#####1.1.3.15#####
~no-pathway_1.1.3.15_S-2-HYDROXY-ACID-OXIDASE-RXN : 1.0 oxygen + 1.0 [S-2-Hydroxyacids] --> 1.0
hydrogen_peroxide + 1.0 [2-Oxo-carboxylates] # source: MetaCyc, BRENDA, KEGG (queried 1.1.3.15)
#####1.11.1.15#####
~no-pathway_1.11.1.15_RXN0-5468 : 1.0 [Red-Thioredoxin] + 1.0 [Alkyl-Hydro-Peroxides] -->
1.0 [Alcohols] + 1.0 H2O + 1.0 [Ox-Thioredoxin] # source: MetaCyc (queried 1.11.1.15)
#####1.2.1.3#####

```

```

-no-pathway_1.2.1.3_ALDHDEHYDROG-RXN : 1.0 |Aldehydes| + 1.0 H2O + 1.0 NAD+ --> 1.0 NADH + 1.0 |
Carboxylates| + 2.0 H+ # source: MetaCyc, BRENDA, KEGG (queried 1.2.1.3) // other EC numbers for this reaction: 1.2.1.5
#####3.1.1.96#####
-no-pathway_3.1.1.96_RXN-15041 : 1.0 |D-aminoacyl-tRNAs| + 1.0 H2O --> 1.0 |tRNAs| + 2.0
H+ + 1.0 |D-Amino-Acids| # source: MetaCyc (queried 3.1.1.96)
#####3.5.1.3#####
-no-pathway_3.5.1.3_OMEGA-AMIDASE-RXN : 1.0 DICARBOXYLIC-ACID-MONOAMIDES + 1.0 H2O --> 1.0
ammonium + 1.0 |dicarboxylate| # source: MetaCyc (queried 3.5.1.3)
#####3.5.1.81#####
-no-pathway_3.5.1.81_3.5.1.81-RXN : 1.0 N-Acyl-D-amino_acid + 1.0 H2O --> 1.0 |Carboxylates|
+ 1.0 |D-Amino-Acids| # source: MetaCyc, BRENDA, KEGG (queried 3.5.1.81)
#####3.5.1.87#####
-no-pathway_3.5.1.87_3.5.1.87-RXN : 1.0 H2O + 2.0 H+ + 1.0 |N-Carbamoyl-L-Amino-Acids| -->
1.0 ammonium + 1.0 |L-Amino-Acids| + 1.0 CO2 # source: MetaCyc, BRENDA, KEGG (queried 3.5.1.87)
#####5.5.1.6#####
-no-pathway_5.5.1.6_CHALCONE-ISOMERASE-RXN : 1.0 |Chalcones| <=> 1.0 flavanone # source: MetaCyc,
BRENDA, KEGG (queried 5.5.1.6)
#####
#References
#Aboulnaga, E.-H., Pinkenburg, O., Schiffels, J., El-Refai, A., Buckel, W. & Selmer, T. (2013). Butyrate production in Escherichia coli: Exploitation of an oxygen tolerant
bifurcating butyryl-CoA dehydrogenase/electron transferring flavoprotein complex from Clostridium difficile. J Bacteriol JB.00321-13.
#Brown, A. M., Hoopes, S. L., White, R. H. & Sarisky, C. A. (2011). Purine biosynthesis in archaea: variations on a theme. Biology Direct 6, 63.
#Burguière, P., Auger, S., Hullo, M.-F., Danchin, A. & Martin-Verstraete, I. (2004). Three different systems participate in L-cystine uptake in Bacillus subtilis. J Bacteriol 186,
4875-4884.
#Calusinska, M., Happe, T., Joris, B. & Wilmotte, A. (2010). The surprising diversity of clostridial hydrogenases: a comparative genomic perspective. Microbiology 156, 1575-1588.
#Colby, G. D. & Chen, J. S. (1992). Purification and properties of 3-hydroxybutyryl-coenzyme A dehydrogenase from Clostridium beijerinckii ('Clostridium butylicum') NRRL B593.
Appl Environ Microbiol 58, 3297-3302.
#Curthoys, N. P. & Rabinowitz, J. C. (1972). Formyltetrahydrofolate synthetase. Binding of folate substrates and kinetics of the reverse reaction. J Biol Chem 247, 1965-1971.
#Curthoys, N. P., Scott, J. M. & Rabinowitz, J. C. (1972). Folate Coenzymes of Clostridium acidu-urici THE ISOLATION OF (1)-5,10-METHENYLTETRAHYDROPTEROYLTRIGLUTAMATE, ITS
CONVERSION TO (1)-TETRAHYDROPTEROYLTRIGLUTAMATE AND (1)-10-[14C]FORMYLTETRAHYDROPTEROYLTRIGLUTAMATE, AND THE SYNTHESIS OF (1)-10-FORMYL-[6,7-3H2]TETRAHYDROPTEROYLTRIGLUTAMATE AND
(1)-[6,7-3H2]TETRAHYDROPTEROYLTRIGLUTAMATE. J Biol Chem 247, 1959-1964.
#Elsden, S. R., Hilton, M. G., Parsley, K. R. & Self, R. (1980). The Lipid Fatty Acids of Proteolytic Clostridia. J Gen Microbiol 118, 115-123.
#Fahey, R. C., Brown, W. C., Adams, W. B. & Worsham, M. B. (1978). Occurrence of glutathione in bacteria. J Bacteriol 133, 1126-1129.
#Falany, C. N., Fortinberry, H., Leiter, E. H. & Barnes, S. (1997). Cloning, expression, and chromosomal localization of mouse liver bile acid CoA:amino acid N-acyltransferase. J
Lipid Res 38, 1139-1148.
#Faulds-Pain, A., Twine, S. M., Vinogradov, E., Strong, P. C. R., Dell, A., Buckley, A. M., Douce, G. R., Valiente, E., Logan, S. M. & Wren, B. W. (2014). The post-translational
modification of the Clostridium difficile flagellin affects motility, cell surface properties and virulence. Molecular Microbiology 94, 272-289.
#Han, B., Gopalan, V. & Ezeji, T. C. (2011). Acetone production in solventogenic Clostridium species: new insights from non-enzymatic decarboxylation of acetoacetate. Appl
Microbiol Biotechnol 91, 565-576.
#Hess, V., Schuchmann, K. & Müller, V. (2013). The Ferredoxin:NAD+ Oxidoreductase (Rnf) from the Acetogen Acetobacterium woodii Requires Na+ and Is Reversibly Coupled to the
Membrane Potential. J Biol Chem 288, 31496-31502.
#Hugo, H. V., Schoberth, S., Madan, V. K. & Gottschalk, G. (1972). Coenzyme specificity of dehydrogenases and fermentation of pyruvate by clostridia. Archiv Mikrobiol 87, 189-202.
#Jiang, W., Hermolin, J. & Fillingame, R. H. (2001). The preferred stoichiometry of c subunits in the rotary motor sector of Escherichia coli ATP synthase is 10. PNAS 98, 4966-
4971.
#Kleiner, D. (1985). Bacterial ammonium transport. FEMS Microbiology Letters 32, 87-100.
#Köpke, M., Held, C., Hujer, S., Liesegang, H., Wiezer, A., Wollherr, A., Ehrenreich, A., Liebl, W., Gottschalk, G. & Dürre, P. (2010). Clostridium ljungdahlii represents a
microbial production platform based on syngas. PNAS 107, 13087-13092.
#Meyer, E., Leonard, N. J., Bhat, B., Stubbe, J. & Smith, J. M. (1992). Purification and characterization of the purE, purK, and purC gene products: identification of a previously
unrecognized energy requirement in the purine biosynthetic pathway. Biochemistry 31, 5022-5032.
#Midtvedt, T. & Norman, A. (1967). Bile Acid Transformations by Microbial Strains Belonging to Genera Found in Intestinal Contents. Acta Pathologica Microbiologica Scandinavica
71, 629-638.
#Mock, J., Zheng, Y., Mueller, A. P., Ly, S., Tran, L., Segovia, S., Nagaraju, S., Köpke, M., Dürre, P. & Thauer, R. K. (2015). Energy Conservation Associated with Ethanol
Formation from H2 and CO2 in Clostridium autoethanogenum Involving Electron Bifurcation. J Bacteriol 197, 2965-2980.
#Moore, S. J., Biedendieck, R., Lawrence, A. D., Deery, E., Howard, M. J., Rigby, S. E. J. & Warren, M. J. (2013). Characterization of the Enzyme CbiH60 Involved in Anaerobic Ring
Contraction of the Cobalamin (Vitamin B12) Biosynthetic Pathway. J Biol Chem 288, 297-305.
#Murata, T., Yamato, I., Kakinuma, Y., Leslie, A. G. W. & Walker, J. E. (2005). Structure of the rotor of the V-Type Na+-ATPase from Enterococcus hirae. Science 308, 654-659.
#Musfeldt, M. & Schönheit, P. (2002). Novel Type of ADP-Forming Acetyl Coenzyme A Synthetase in Hyperthermophilic Archaea: Heterologous Expression and Characterization of
Isoenzymes from the Sulfate Reducer Archaeoglobus fulgidus and the Methanogen Methanococcus jannaschii. J Bacteriol 184, 636-644.
#Nagarajan, H., Sahin, M., Nogales, J., Latif, H., Lovley, D. R., Ebrahim, A. & Zengler, K. (2013). Characterizing acetogenic metabolism using a genome-scale metabolic
reconstruction of Clostridium ljungdahlii. Microb Cell Fact 12, 118.
#Patrick, W. M., Quandt, E. M., Swartzlander, D. B. & Matsumura, I. (2007). Multicopy Suppression Underpins Metabolic Evolvability. Mol Biol Evol 24, 2716-2722.
#Peltier, J., Courtin, P., Meouche, I. E., Lemée, L., Chapot-Chartier, M.-P. & Pons, J.-L. (2011). Clostridium difficile Has an Original Peptidoglycan Structure with a High Level
of N-Acetylglucosamine Deacetylation and Mainly 3-3 Cross-links. J Biol Chem 286, 29053-29062.
#Pitts, A. C., Tuck, L. R., Faulds-Pain, A., Lewis, R. J. & Marles-Wright, J. (2012). Structural Insight into the Clostridium difficile Ethanolamine Utilisation Microcompartment.

```

Scenario S1: Exemplary scenario file (MDM, 3 h) for the metabolic model iHD922 of *C. difficile* 630Δerm

```

LB      NGAM                                                    2
#to inhibit
fatty-acid-I/2_2.3.1.39_MALONYL-COA-ACP-TRANSACYL-RXN - 7.123 fatty-acid-
I/3a_manual_HD-acet = 0
acetyl-CoA-to-butyrate-II/1_2.3.1.9_ACETYL-COA-ACETYLTRANSFER-RXN - 20 hexanoate-
ferm/1_2.3.1.9_RXN-12565      > 0
acetyl-CoA-to-butyrate-II/1_2.3.1.9_ACETYL-COA-ACETYLTRANSFER-RXN - 3 pentanoate-
ferm/1_2.3.1.9_RXN-12561      > 0
#####Substrates/Products in MDM/CDMM#####
LB      glycine_exchange                                         0
LB      aspartate_exchange                                       0
LB      glutamate_exchange                                       0
LB      serine_exchange                                          0
LB      threonine_exchange                                       0
LB      tyrosine_exchange                                        0
LB      phenylalanine_exchange                                   0
LB      arginine_exchange                                       0
LB      histidine_exchange                                      0
LB      lysine_exchange                                          0
#Gases
LB      H2_exchange                                              0
LB      CO_exchange                                              0
UB      CO_exchange                                              0
LB      methanethiol_exchange                                    0
LB      sulfite_exchange                                         0
#Alcohols
LB      ethanol_exchange                                         0
LB      propanol_exchange                                        0
LB      butanol_exchange                                         0
LB      isobutanol_exchange                                     0
#Acids
LB      formate_exchange                                         0
LB      acetate_exchange                                         0
LB      propanoate_exchange                                      0
LB      butanoate_exchange                                      0
LB      valerate_exchange                                       0
LB      hexanoate_exchange                                       0
LB      (R)-3-hydroxybutanoate_exchange                        0
LB      isocaproate_exchange                                    0
LB      3-phenylpropanoate_exchange                            0
LB      3-(4-hydroxyphenyl)propanoate_exchange                0
LB      (S)-lactate_exchange                                    0
LB      (R)-lactate_exchange                                    0
#Other
LB      S-methyl-5-thio-D-ribose_exchange                     0
LB      beta-alanine_exchange                                   0
LB      2-aminobutanoate_exchange                             0
#####Other Substrates/Products#####
#bases
LB      cytosine_exchange                                       0
LB      adenine_exchange                                         0
LB      guanine_exchange                                        0
LB      hypoxanthine_exchange                                   0
LB      uracil_exchange                                         0
LB      xanthine_exchange                                       0
LB      urate_exchange                                          0
LB      thymine_exchange                                        0

```

|                                         |   |
|-----------------------------------------|---|
| #amino acids and amines                 |   |
| LB asparagine_exchange                  | 0 |
| LB glutamine_exchange                   | 0 |
| LB 4-hydroxyproline_exchange            | 0 |
| LB cystathionine_exchange               | 0 |
| LB spermidine_exchange                  | 0 |
| LB putrescine_exchange                  | 0 |
| LB 2,3-diaminopropanoate_exchange       | 0 |
| LB hydroxylamine_exchange               | 0 |
| LB ethanolamine_exchange                | 0 |
| LB 4-hydroxyphenylacetate_exchange      | 0 |
| #with phosphorous                       |   |
| LB sn-glycerol-3-phosphate_exchange     | 0 |
| LB methylphosphonate_exchange           | 0 |
| LB 2-aminoethylphosphonate_exchange     | 0 |
| LB phosphonoacetate_exchange            | 0 |
| #non-sugar carbohydrates                |   |
| LB succinate_exchange                   | 0 |
| LB tartronate-semialdehyde_exchange     | 0 |
| LB acetoin_exchange                     | 0 |
| LB 3-hydroxy-3-methylglutarate_exchange | 0 |
| #tox                                    |   |
| LB hydroxyl-radical_exchange            | 0 |
| LB superoxide_exchange                  | 0 |
| LB hydrogen_peroxide_exchange           | 0 |
| LB oxygen_exchange                      | 0 |
| LB methanol_exchange                    | 0 |
| LB cyanide_exchange                     | 0 |
| LB thiocyanate_exchange                 | 0 |
| #bile acids                             |   |
| LB taurochenodeoxycholate_exchange      | 0 |
| LB chenodeoxycholate_exchange           | 0 |
| LB taurocholate_exchange                | 0 |
| LB cholate_exchange                     | 0 |
| #sugars and sugar alcohols              |   |
| LB D-arabinose_exchange                 | 0 |
| LB xylan_exchange                       | 0 |
| LB xylose_exchange                      | 0 |
| LB galactose_exchange                   | 0 |
| LB xylitol_exchange                     | 0 |
| LB arabitol_exchange                    | 0 |
| LB ribitol_exchange                     | 0 |
| LB D-sorbitol_exchange                  | 0 |
| LB D-mannitol_exchange                  | 0 |
| LB D-ribopyranose_exchange              | 0 |
| LB 2'-deoxyribose_exchange              | 0 |
| LB maltose_exchange                     | 0 |
| LB sucrose_exchange                     | 0 |
| LB D-tagatose_exchange                  | 0 |
| LB D-fructofuranose_exchange            | 0 |
| LB D-cellobiose_exchange                | 0 |
| LB chitobiose_exchange                  | 0 |
| LB trehalose_exchange                   | 0 |
| LB cyclodextrin_exchange                | 0 |
| LB starch_exchange                      | 0 |
| LB maltodextrin_exchange                | 0 |
| LB pullulan_exchange                    | 0 |
| LB maltotriose_exchange                 | 0 |
| LB N-acetylneuraminate_exchange         | 0 |

|        |                                         |                |
|--------|-----------------------------------------|----------------|
| LB     | N-acetyl-D-galactosamine_exchange       | 0              |
| LB     | D-galactosamine_exchange                | 0              |
| LB     | D-glucosamine_exchange                  | 0              |
| LB     | 2-0-alpha-mannosyl-D-glycerate_exchange | 0              |
| LB     | D-altronate_exchange                    | 0              |
| LB     | 2-dehydro-3-deoxy-D-gluconate_exchange  | 0              |
| #other |                                         |                |
| LB     | riboflavin_exchange                     | 0              |
| LB     | cobinamide_exchange                     | 0              |
| LB     | coenzyme-B12_exchange                   | 0              |
| LB     | dethiobiotin_exchange                   | 0              |
| LB     | sulfolactate_exchange                   | 0              |
| LB     | choline_exchange                        | 0              |
| LB     | formylaminopyrimidine_exchange          | 0              |
| LB     | D-Glucose_exchange                      | -47.3671043246 |
| UB     | D-Glucose_exchange                      | -47.3671043246 |
| LB     | cysteine_exchange                       | -73.4834483508 |
| LB     | methionine_exchange                     | -8.5664873159  |
| LB     | tryptophan_exchange                     | -1.0401670259  |
| LB     | isoleucine_exchange                     | -5.110423686   |
| LB     | leucine_exchange                        | -1.8333183353  |
| LB     | valine_exchange                         | -1.8581174684  |
| LB     | proline_exchange                        | -15.9071454768 |
| LB     | alanine_exchange                        | 0              |
| LB     | Biomass                                 | 0.4139957168   |
| OBJ    | max exopolysaccharide_exchange          |                |

Table S1: **Isotope labeling of glycolysis and glycolysis-related metabolites.** Intracellular metabolites analyzed by GC/MS of *C. difficile* 630 $\Delta$ *erm* cultivated in MDM with full  $^{13}\text{C}$ -labeled glucose and harvested at OD 0.22.

| Metabolite               | Derivative | Fragment | C/Si   | Backbone | M+0            | M+1 | M+2            | M+3            | M+4            | M+5            |
|--------------------------|------------|----------|--------|----------|----------------|-----|----------------|----------------|----------------|----------------|
| Glucose                  | 1MeOX/5TMS | 319      | C13Si3 | C2-C5    | 0.0            | 0.0 | 0.0            | 0.0            | 100.0          | 0.0            |
|                          |            | 205      | C8Si2  | C5+C6    | 0.0            | 0.0 | 100.0          | 0.0            | 0.0            | 0.0            |
|                          |            | 364      | C14Si3 | C1-C4    | 0.0            | 0.0 | 0.0            | 0.0            | 100.0          | 0.0            |
| Glucose<br>6-phosphate   | 1MeOX/6TMS | 387      | C13Si3 | C3-C6    | 36.9 $\pm$ 2.2 | 0.0 | 0.0            | 0.0            | 63.1 $\pm$ 4.9 | 0.0            |
|                          |            | 471      | C16Si4 | C2-C6    | 36.8 $\pm$ 3.6 | 0.0 | 0.0            | 0.0            | 0.0            | 62.8 $\pm$ 3.1 |
|                          |            | 160      | C6Si1  | C1+C2    | 35.9 $\pm$ 3.7 | 0.0 | 64.1 $\pm$ 2.0 | 0.0            | 0.0            | 0.0            |
| Glycerate<br>3-phosphate | 4TMS       | 387      | C12Si3 | C1-C3    | 89.5 $\pm$ 7.5 | 0.0 | 0.0            | 10.5 $\pm$ 1.5 | 0.0            | 0.0            |
|                          |            | 459      | C14Si4 | C1-C3    | 90.2 $\pm$ 0.3 | 0.0 | 0.0            | 9.8 $\pm$ 0.2  | 0.0            | 0.0            |
| Pyruvate                 | 2TMS       | 217      | C8Si2  | C1-C3    | 91.4 $\pm$ 3.3 | 0.0 | 0.0            | 8.6 $\pm$ 1.3  | 0.0            | 0.0            |
|                          | 1MeOX/1TMS | 174      | C6Si   | C1-C3    | 91.0 $\pm$ 3.0 | 0.0 | 0.0            | 9.0 $\pm$ 0.6  | 0.0            | 0.0            |
|                          |            | 189      | C7Si   | C1-C3    | 90.9 $\pm$ 3.4 | 0.0 | 0.0            | 9.1 $\pm$ 0.4  | 0.0            | 0.0            |
| Alanine                  | 2TMS       | 116      | C5Si   | C2+C3    | 90.1 $\pm$ 2.2 | 0.0 | 9.9 $\pm$ 0.3  | 0.0            | 0.0            | 0.0            |
|                          |            | 190      | C7Si2  | 2xC      | 90.1 $\pm$ 0.1 | 0.0 | 8.9 $\pm$ 0.0  | 0.0            | 0.0            | 0.0            |
| Lactate                  | 2TMS       | 219      | C8Si2  | C1-C3    | 91.2 $\pm$ 6.3 | 0.0 | 0.0            | 8.8 $\pm$ 1.5  | 0.0            | 0.0            |
|                          |            | 117      | C5Si   | C2+C3    | 93.0 $\pm$ 1.9 | 0.0 | 7.0 $\pm$ 1.1  | 0.0            | 0.0            | 0.0            |
| Cysteine                 | 3TMS       | 232      | C9Si2  | C1-C3    | 100.0          | 0.0 | 0.0            | 0.0            | 0.0            | 0.0            |

Table S2: Biomass composition used for the model iHD992

| Component         | Cell composition |       |        |        |         |       |
|-------------------|------------------|-------|--------|--------|---------|-------|
| Protein           | 0,508            | 0,508 | ±0.014 | 0,5284 | 0,4     | 0,55  |
| RNA               | 0,091            | 0,091 | ±0.001 | 0,0655 | 0,12    | 0,205 |
| DNA               | 0,043            | 0,043 | ±0.002 | 0,0260 | 0,03    | 0,031 |
| Lipid             | 0,060            | 0,084 | ±0.002 | 0,076  | 0,04291 | 0,091 |
| Lipoteichoic acid | 0,024            |       |        | 0,0304 | 0,02709 | 0,034 |
| Peptidoglycan     | 0,145            |       |        | 0,1009 | 0,1344  | 0,025 |
| Polysaccharide II | 0,097            |       |        | 0,1234 | 0,1056  |       |
| Glycogen          | 0,005            |       |        | 0,0000 |         | 0,025 |
| Ions              | 0,022            |       |        | 0,0321 | 0,0944  | 0,01  |
| Metabolites       | 0,005            |       |        | 0,0173 | 0,0456  | 0,029 |
| Sum               | 1,000            | 0,726 |        | 1,0000 | 1,00000 | 1,000 |

|                                                                                                                                         |
|-----------------------------------------------------------------------------------------------------------------------------------------|
| <i>Clostridium difficile</i> NCTC 11223 (Poxton and Cartmill, 1982):<br>Cell wall polysaccharide II 40% by weight of SDS-purified walls |
| <i>Clostridium difficile</i> 630Δ <i>erm</i> (this work)                                                                                |
| <i>Bacillus subtilis</i> , dilution rate of 0.1/h (Dauner and Sauer, 2001)                                                              |
| <i>Staphylococcus aureus</i> (Heinemann et al., 2005)                                                                                   |
| <i>Escherichia coli</i> (Neidhard et al., 1990)                                                                                         |

|                      | Molecular weight [g/mol] |
|----------------------|--------------------------|
| Water                | 18,015                   |
| Hydrogen             | 2,016                    |
| Glycerol-3-phosphate | 170,06                   |
| Glycerol             | 92,094                   |
| Phosphate            | 95,979                   |
| Methane              | 16,043                   |

### Amino acid analysis of hydrolyzed cells

| Amino acid    | Mass [g]     | standard deviation | Masses including assumptions [g] | Molecular weight [g/mol] | Molecular weight in protein [g/mol] | Demand per biomass [mmol] | Demand for peptidoglycan [mmol] | Demand for protein [g] |
|---------------|--------------|--------------------|----------------------------------|--------------------------|-------------------------------------|---------------------------|---------------------------------|------------------------|
| Glycine       | 0,0258760    | 0,0019797          | 0,0258760                        | 75,07                    | 57,05                               | 0,34471                   | 0,00655                         | 0,01929                |
| Alanine       | 0,0510480    | 0,0041868          | 0,0510480                        | 89,09                    | 71,08                               | 0,57297                   | 0,23278                         | 0,02418                |
| Valine        | 0,0263600    | 0,0021179          | 0,0263600                        | 117,15                   | 99,14                               | 0,22501                   |                                 | 0,02231                |
| Leucine       | 0,0406434    | 0,0032087          | 0,0406434                        | 131,17                   | 113,16                              | 0,30985                   |                                 | 0,03506                |
| Isoleucine    | 0,0246838    | 0,0020485          | 0,0246838                        | 131,17                   | 113,16                              | 0,18818                   |                                 | 0,02129                |
| Serine        | 0,0234864    | 0,0017999          | 0,0234864                        | 105,09                   | 87,08                               | 0,22349                   |                                 | 0,01946                |
| Threonine     | 0,0265723    | 0,0020727          | 0,0265723                        | 119,12                   | 101,11                              | 0,22307                   |                                 | 0,02255                |
| Phenylalanine | 0,0209894    | 0,0016538          | 0,0209894                        | 165,19                   | 147,18                              | 0,12706                   |                                 | 0,01870                |
| Tyrosine      | 0,0183924    | 0,0011384          | 0,0183924                        | 181,19                   | 163,18                              | 0,10151                   |                                 | 0,01656                |
| Tryptophan    | not detected |                    | 0,0060981                        | 204,23                   | 186,22                              | 0,02986                   |                                 | 0,00556                |
| Cysteine      | not detected |                    | 0,0060981                        | 121,15                   | 103,14                              | 0,05034                   |                                 | 0,00519                |

|                                                           |              |           |           |        |        |         |         |         |
|-----------------------------------------------------------|--------------|-----------|-----------|--------|--------|---------|---------|---------|
| Methionine                                                | 0,0051211    | 0,0002230 | 0,0051211 | 149,21 | 131,20 | 0,03432 |         | 0,00450 |
| Lysine                                                    | 0,0475186    | 0,0065515 | 0,0475186 | 147,20 | 129,19 | 0,32282 |         | 0,04170 |
| Arginine                                                  | 0,0230321    | 0,0026527 | 0,0230321 | 175,21 | 157,20 | 0,13145 |         | 0,02066 |
| Histidine                                                 | 0,0076227    | 0,0013264 | 0,0076227 | 155,16 | 137,15 | 0,04913 |         | 0,00674 |
| Aspartate                                                 | 0,0630830    | 0,0047067 | 0,0315415 | 132,10 | 114,09 | 0,23877 |         | 0,02724 |
| Glutamate                                                 | 0,1052600    | 0,0084886 | 0,0842080 | 146,12 | 128,11 | 0,57629 | 0,14451 | 0,05531 |
| Asparagine                                                | not detected |           | 0,0315415 | 132,12 | 114,11 | 0,23873 |         | 0,02724 |
| Glutamine                                                 | not detected |           | 0,0210520 | 146,15 | 128,14 | 0,14404 |         | 0,01846 |
| Proline                                                   | 0,0211960    | 0,0024992 | 0,0211960 | 115,13 | 97,12  | 0,18411 |         | 0,01788 |
| Selenocysteine                                            | not detected |           | 0,0000762 | 168,05 | 150,04 | 0,00045 |         | 0,00007 |
| Diaminopimelate                                           | 0,0273905    | 0,0013085 | 0,0273905 | 190,20 | 172,19 | 0,14401 | 0,14401 | 0,00000 |
| Sum                                                       | 0,5582758    |           | 0,5705483 |        |        |         |         | 0,42997 |
| <i>Clostridium difficile</i> 630 $\Delta$ erm (this work) |              |           |           |        |        |         |         |         |

Peptidoglycan/Biomass based on corrected  
diaminopimelate concentration: 0,145035

## Protein

| Amino acid      | Corrected demand for protein per biomass [g/g] | Demand [mmol/g Protein] |
|-----------------|------------------------------------------------|-------------------------|
| Glycine         | 0,02279                                        | 0,59772                 |
| L-alanine       | 0,02857                                        | 0,63120                 |
| L-valine        | 0,02635                                        | 0,44284                 |
| L-leucine       | 0,04142                                        | 0,62167                 |
| L-isoleucine    | 0,02516                                        | 0,37755                 |
| L-serine        | 0,02299                                        | 0,43067                 |
| L-threonine     | 0,02665                                        | 0,44035                 |
| L-phenylalanine | 0,02209                                        | 0,26329                 |
| L-tyrosine      | 0,01957                                        | 0,21261                 |
| L-tryptophan    | 0,00657                                        | 0,06332                 |
| L-cysteine      | 0,00613                                        | 0,09966                 |
| L-methionine    | 0,00532                                        | 0,07019                 |
| L-lysine        | 0,04927                                        | 0,65890                 |
| L-arginine      | 0,02441                                        | 0,27429                 |
| L-histidine     | 0,00796                                        | 0,10099                 |
| L-aspartate     | 0,03218                                        | 0,47959                 |
| L-glutamate     | 0,06535                                        | 0,88041                 |
| L-asparagine    | 0,03218                                        | 0,47953                 |



|                  |         |         |
|------------------|---------|---------|
| L-glutamine      | 0,02181 | 0,29371 |
| L-proline        | 0,02112 | 0,36118 |
| L-selenocysteine | 0,00008 | 0,00094 |
| Sum              | 0,50800 | 7,78062 |

## RNA

|      | Weight per cell<br>[fg] | $\chi$  |
|------|-------------------------|---------|
| rRNA | 48                      | 0,81356 |
| tRNA | 8,6                     | 0,14576 |
| mRNA | 2,4                     | 0,04068 |

### rRNA

|               | Count | $\chi$ | Molecular weight [g/mol] | Molecular weight (real) [g/mol] | Mass [g/mol monomer] | Demand [mmol/g RNA] |         |
|---------------|-------|--------|--------------------------|---------------------------------|----------------------|---------------------|---------|
| AMP (ATP)     | 14915 |        | 0,27661                  | 345,21                          | 328,20               | 90,78370            | 0,70362 |
| GMP (GTP)     | 11726 |        | 0,21747                  | 361,21                          | 344,20               | 74,85255            | 0,55318 |
| CMP (CTP)     | 15954 |        | 0,29588                  | 321,18                          | 304,17               | 89,99789            | 0,75264 |
| UMP (UTP)     | 11326 |        | 0,21005                  | 322,17                          | 305,16               | 64,09889            | 0,53431 |
| Methylation   | 360   |        | 0,00668                  | 16,04                           | 14,03                | 0,09365             | 0,01698 |
| Hydrogenation | 24    |        | 0,00045                  |                                 | 2,02                 | 0,00090             | 0,00113 |
|               | 53921 |        |                          |                                 |                      | 319,82757           | 2,56186 |

### tRNA

|               | Count | $\chi$ | Molecular weight [g/mol] | Molecular weight (real) [g/mol] | Mass [g/mol monomer] | Demand [mmol/g RNA] |         |
|---------------|-------|--------|--------------------------|---------------------------------|----------------------|---------------------|---------|
| AMP (ATP)     | 1409  |        | 0,19977                  | 345,21                          | 328,20               | 65,56615            | 0,08508 |
| GMP (GTP)     | 1579  |        | 0,22388                  | 361,21                          | 344,20               | 77,05892            | 0,09535 |
| CMP (CTP)     | 2134  |        | 0,30257                  | 362,21                          | 345,20               | 104,44679           | 0,12887 |
| UMP (UTP)     | 1931  |        | 0,27378                  | 363,21                          | 346,20               | 94,78491            | 0,11661 |
| Methylation   | 180   |        | 0,02552                  | 16,04                           | 14,03                | 0,35798             | 0,01087 |
| Hydrogenation | 90    |        | 0,01276                  |                                 | 2,02                 | 0,02573             | 0,00543 |
|               | 7053  |        |                          |                                 |                      | 342,24047           | 0,44221 |

### mRNA

|           | Count | $\chi$ | Molecular weight [g/mol] | Molecular weight (real) [g/mol] | Mass [g/mol monomer] | Demand [mmol/g RNA] |         |
|-----------|-------|--------|--------------------------|---------------------------------|----------------------|---------------------|---------|
| AMP (ATP) |       |        | 0,35459                  | 345,21                          | 328,20               | 116,37835           | 0,04524 |

|               |         |        |        |           |         |
|---------------|---------|--------|--------|-----------|---------|
| GMP (GTP)     | 0,14541 | 361,21 | 344,20 | 50,04967  | 0,01855 |
| CMP (CTP)     | 0,14541 | 321,18 | 304,17 | 44,22901  | 0,01855 |
| UMP (UTP)     | 0,35459 | 322,17 | 305,16 | 108,20854 | 0,04524 |
| Methylation   | 0,00000 | 16,04  | 14,03  | 0,00000   | 0,00000 |
| Hydrogenation | 0,00000 |        | 2,02   | 0,00000   | 0,00000 |
|               |         |        |        | 318,86557 | 0,12757 |

Abundances of RNA types in *E. coli* (Neidhard *et al.*, 1990)  
Methylation and hydrogenation based on Modomics database (Machnicka *et al.*, 2013)  
23S rRNA: *E. coli*, 16S rRNA: *C. acetobutylicum*, tRNA: *B.subtilis*  
GC contend of genome (unpublished work, Dannheim *et al.*, 2016)

|               | Demand<br>[mmol/g RNA] |
|---------------|------------------------|
| AMP (ATP)     | 0,83394                |
| GMP (GTP)     | 0,66708                |
| CMP (CTP)     | 0,90005                |
| UMP (UTP)     | 0,69615                |
| Metylation    | 0,02785                |
| Hydrogenation | 0,00657                |

## DNA

|             | Count   | $\chi$  | Molecular weight [g/mol] | Molecular weight (real) [g/mol] | Mass [g/mol monomer] | Demand [mmol/g DNA] |
|-------------|---------|---------|--------------------------|---------------------------------|----------------------|---------------------|
| dAMP (dATP) | 3044566 | 0,35459 | 329,21                   | 312,20                          | 110,70487            | 1,15183             |
| dGMP (dGTP) | 1248482 | 0,14541 | 345,21                   | 328,20                          | 47,72315             | 0,47233             |
| dCMP (dCTP) | 1248482 | 0,14541 | 305,18                   | 288,17                          | 41,90249             | 0,47233             |
| dTMP (dTTP) | 3044566 | 0,35459 | 320,20                   | 303,19                          | 107,50999            | 1,15183             |
| Metylation  | 8000    | 0,00093 | 14,03                    | 12,01                           | 0,01119              | 0,00303             |
|             | 8586096 |         |                          |                                 | 307,85169            |                     |

Based on sequence (unpublished work, Dannheim *et al.*, 2016)  
Estimated from literature (van Eijk *et al.*, 2015):

## Lipid

|                   | Molecular weight [g/mol] | Fatty acids          |
|-------------------|--------------------------|----------------------|
| Fatty acid        | 258,54                   | chain length: 16,246 |
| Glycerolphosphate | 170,06                   | unsaturations: 0,164 |
| Glycerol          | 92,09                    |                      |

|                      | Molecular weight [g/mol] | $\chi$ | Demand [mmol/g Lipid] |
|----------------------|--------------------------|--------|-----------------------|
| phosphatidylglycerol | 722,17                   | 0,5    | 0,69236               |
| cardiolipin          | 1352,24                  | 0,5    | 0,36976               |

Fatty acids of *C. difficile* NCIB 10666 (Elsden *et al.*, 1980):

Only phosphatidylglycerol-analogs could be found in *C. difficile* isolates (Drucker *et al.*, 1996)

### Lipoteichoic acid

|                        | $\chi$   | Molecular weight [g/mol] | Molecular weight (real) [g/mol] | Mass [g/mol monomer] |
|------------------------|----------|--------------------------|---------------------------------|----------------------|
| N-Acetyl-D-Glucosamine | 10,14804 | 221,21                   | 203,20                          | 2062,03              |
| Deacetylation          | 1,22221  | 60,05                    | -42,04                          | -51,38               |
| Glycerate              | 5,07402  | 105,07                   | 87,06                           | 441,72               |
| Glucose                | 3,00000  | 180,16                   | 162,15                          | 486,44               |
| 1,2-diacyl-sn-glycerol | 1,00000  | 575,16                   | 575,16                          | 575,16               |
| Phosphate              | 5,07402  | 95,98                    | 78,97                           | 400,71               |
|                        |          |                          |                                 | 3914,68              |

  

|                            | Demand [mmol/g Lipoteichoic acid] |
|----------------------------|-----------------------------------|
| UDP-N-acetyl-D-Glucosamine | 2,59231                           |
| Deacetylation              | 0,31221                           |
| 2-phospho-D-glycerate      | 1,29615                           |
| UDP-Glucose                | 0,76635                           |
| 1,2-diacyl-sn-glycerol     | 0,25545                           |
| ATP                        | 1,29615                           |

Composition and chain length in *C. difficile* 630 (Reid *et al.*, 2012)

Average chain length from integration of NMR data: 4,07

### Peptidoglycan

|                 | $\chi$  | Molecular weight [g/mol] | Molecular weight (real) [g/mol] | Mass [g/mol monomer] | Demand [mmol/g Peptidoglycan] |
|-----------------|---------|--------------------------|---------------------------------|----------------------|-------------------------------|
| L-alanine       | 1,00000 | 89,09                    | 71,08                           | 71,08                | 1,17720                       |
| D-glutamate     | 1,00000 | 146,12                   | 128,11                          | 128,11               | 1,17720                       |
| Diaminopimelate | 0,99654 | 190,20                   | 172,19                          | 171,59               | 1,17312                       |
| D-alanine       | 0,61085 | 89,09                    | 71,08                           | 43,42                | 0,71910                       |
| Glycine         | 0,04532 | 75,07                    | 57,05                           | 2,59                 | 0,05335                       |
| Deacetylation   | 0,92783 | 59,04                    | -42,04                          | -39,00               | 1,09224                       |

|                        |         |        |        |        |         |
|------------------------|---------|--------|--------|--------|---------|
| Other modifications    | 0,31933 |        | -18,02 | -5,75  | 0,37591 |
| N-Acetyl-D-Glucosamine | 1,00000 | 221,21 | 203,20 | 203,20 | 1,17720 |
| N-Acetylmuramic acid   | 1,00000 | 292,27 | 274,26 | 274,26 | 1,17720 |
|                        |         |        |        | 849,47 |         |

Peptidoglycan composition of *C. difficile* 630 (Peltier *et al.*, 2011)

## Polysaccharide II

|                          | $\chi$ | Molecular weight [g/mol] | Molecular weight (real) [g/mol] | Mass [g/mol monomer] | Demand [mmol/g Polysaccharide II] |
|--------------------------|--------|--------------------------|---------------------------------|----------------------|-----------------------------------|
| N-Acetyl-D-Galactosamine | 2      | 221,21                   | 203,20                          | 406,39               | 1,76376                           |
| Glucose                  | 3      | 180,16                   | 162,15                          | 486,44               | 2,64564                           |
| Mannose                  | 1      | 180,16                   | 162,15                          | 162,15               | 0,88188                           |
| Phosphate                | 1      | 95,98                    | 78,97                           | 78,97                | 0,88188                           |
|                          |        |                          |                                 | 1133,94              |                                   |

Structure of polysaccharide II (Ganeshapillai *et al.*, 2008):

[ $\rightarrow$ 6)- $\beta$ -D-Glcp-(1 $\rightarrow$ 3)- $\beta$ -D-GalpNAc-(1 $\rightarrow$ 4)- $\alpha$ -D-Glcp-(1 $\rightarrow$ 4)-[ $\beta$ -D-Glcp-(1 $\rightarrow$ )- $\beta$ -D-GalpNAc-(1 $\rightarrow$ 3)- $\alpha$ -D-Manp-(1 $\rightarrow$ P]

## Glycogen

Demand [mmol/g Glycogen]  
6,16732

## Ions

|             | $\chi$ | Molecular weight [g/mol] | Mass [g/mol monomer] | mmol/g Ions |
|-------------|--------|--------------------------|----------------------|-------------|
| K           | 0,86   | 39,10                    | 33,62                | 20,96743    |
| Mg          | 0,077  | 24,31                    | 1,87                 | 1,87732     |
| Fe(+3)      | 0,006  | 55,85                    | 0,34                 | 0,14628     |
| Ca          | 0,004  | 40,08                    | 0,16                 | 0,09752     |
| Phosphate   | 0,043  | 95,98                    | 4,13                 | 1,04837     |
| Diphosphate | 0,005  | 174,95                   | 0,87                 | 0,12190     |
| Na          | 0,001  | 22,99                    | 0,02                 | 0,02438     |
| Fe(+2)      | 0,001  | 55,85                    | 0,06                 | 0,02438     |
| Ni          | 0,001  | 58,70                    | 0,06                 | 0,02438     |
| Cd          | 0,001  | 112,40                   | 0,11                 | 0,02438     |
| Zn          | 0,001  | 65,38                    | 0,07                 | 0,02438     |
|             | 1      | 745,58                   | 41,02                |             |

*B. subtilis* (Dauner and Sauer, 2001)

## Metabolites

| Mass [g/mol molecule]             | Ratio   | Molecular weight (real) [g/mol] | $\chi$  | Mass [g/mol Metabolite] | mmol/g Metabolite |
|-----------------------------------|---------|---------------------------------|---------|-------------------------|-------------------|
| ATP                               | 3,2656  | 503,15                          | 0,20446 | 102,87165               | 0,33818           |
| ADP                               | 0,8190  | 424,18                          | 0,05128 | 21,75051                | 0,08481           |
| AMP                               | 0,2988  | 345,21                          | 0,01871 | 6,45802                 | 0,03094           |
| Acetyl-CoA                        | 1,6736  | 805,54                          | 0,10478 | 84,40614                | 0,17332           |
| FAD                               | 0,6438  | 782,53                          | 0,04031 | 31,54185                | 0,06667           |
| NAD                               | 1,6046  | 662,42                          | 0,10046 | 66,54807                | 0,16617           |
| NADH                              | 0,3393  | 663,43                          | 0,02124 | 14,09335                | 0,03514           |
| NADP                              | 0,0042  | 740,39                          | 0,00026 | 0,19469                 | 0,00043           |
| NADPH                             | 0,2415  | 741,39                          | 0,01512 | 11,20983                | 0,02501           |
| ppGpp                             | 0,6438  | 598,12                          | 0,04031 | 24,10874                | 0,06667           |
| Tetrahydropteroyltryglutamate     | 0,6438  | 699,63                          | 0,04031 | 28,20036                | 0,06667           |
| Di-trans,octa-cis-undecaprenyl PP | 0,6438  | 924,25                          | 0,04031 | 37,25424                | 0,06667           |
| Thiamin diphosphate               | 0,6438  | 422,29                          | 0,04031 | 17,02147                | 0,06667           |
| Adenosylcobalamin                 | 0,6438  | 1579,60                         | 0,04031 | 63,66978                | 0,06667           |
| Mg-protoporphyrin                 | 0,6438  | 582,94                          | 0,04031 | 23,49687                | 0,06667           |
| MoO <sub>2</sub> -molybdopterin   | 0,6438  | 519,25                          | 0,04031 | 20,92969                | 0,06667           |
| Biotin                            | 0,6438  | 243,3                           | 0,04031 | 9,80682                 | 0,06667           |
| Me-Thr-P-GluNAc-FliC              | 0,6438  | 279,94                          | 0,04031 | 11,28379                | 0,06667           |
| Pyridoxine 5'-phosphate           | 0,6438  | 247,14                          | 0,04031 | 9,96160                 | 0,06667           |
| L-threonylcarbamoyladenylate      | 0,6438  | 490,32                          | 0,04031 | 19,76359                | 0,06667           |
|                                   | 15,9722 | 12255,02                        | 1,00000 | 604,57108               |                   |

*C. acetobutylicum* in the acidogenic growth phase (Amador-Noguez *et al.*, 2011)

## References

- Amador-Noguez D, Brasg IA, Feng X-J, Roquet N, Rabinowitz JD: Metabolome Remodeling during the Acidogenic-Solventogenic Transition in *Clostridium acetobutylicum*. *Appl Environ Microbiol* 2011, 77:7984–7997.
- Dauner M, Sauer U: Stoichiometric growth model for riboflavin-producing *Bacillus subtilis*. *Biotechnology and Bioengineering* 2001, 76:132–143.
- Drucker DB, Wardle HM, Boote V: Phospholipid profiles of *Clostridium difficile*. *J Bacteriol* 1996, 178:5844–5846.
- van Eijk E, Anvar SY, Browne HP, Leung WY, Frank J, Schmitz AM, Roberts AP, Smits WK: Complete genome sequence of the *Clostridium difficile* laboratory strain 630 $\Delta$ erm reveals differences from strain 630, including translocation of the mobile element CTn5. *BMC Genomics* 2015, 16:31.
- Elsden SR, Hilton MG, Parsley KR, Self R: The Lipid Fatty Acids of Proteolytic *Clostridia*. *J Gen Microbiol* 1980, 118:115–123.
- Ganeshapillai J, Vinogradov E, Rousseau J, Weese JS, Monteiro MA: *Clostridium difficile* cell-surface polysaccharides composed of pentaglycosyl and hexaglycosyl phosphate repeating units. *Carbohydrate Research* 2008, 343:703–710.
- Heinemann M, Kummel A, Ruinatscha R, Panke S: In silico genome-scale reconstruction and validation of the *Staphylococcus aureus* metabolic network. *Biotechnology and Bioengineering* 2005, 92:850–864.

Machnicka, M. A., Milanowska, K., Osman Oglou, O., Purta, E., Kurkowska, M., Olchowik, A., Januszewski, W., Kalinowski, S., Dunin-Horkawicz, S. & other authors. (2013). MODOMICS: a database of RNA modification pathways--2013 update. *Nucleic Acids Res* 41, D262-267.

Neidhardt FC, Ingraham JL, Schaechter M: *Physiology of the Bacterial Cell: A Molecular Approach*. Sunderland: Sinauer Associates; 1990.

Peltier J, Courtin P, Meouche IE, Lemée L, Chapot-Chartier M-P, Pons J-L: *Clostridium difficile* Has an Original Peptidoglycan Structure with a High Level of N-Acetylglucosamine Deacetylation and Mainly 3-3 Cross-links. *J Biol Chem* 2011, 286:29053–29062.

Poxton IR, Cartmill TDI: Immunochemistry of the Cell-Surface Carbohydrate Antigens of *Clostridium difficile*. *J Gen Microbiol* 1982, 128:1365–1370.

Reid CW, Vinogradov E, Li J, Jarrell HC, Logan SM, Brisson J-R: Structural characterization of surface glycans from *Clostridium difficile*. *Carbohydrate Research* 2012, 354:65–73.

Table S3: Fits of the substrate concentrations and OD over time of MDM-cultures with *C. difficile* 630 $\Delta$ erm.

| Function                                                          | Parameters                                                |                                                            | Range            | R <sup>2</sup> |
|-------------------------------------------------------------------|-----------------------------------------------------------|------------------------------------------------------------|------------------|----------------|
| $OD(t) = A_1 + \frac{A_2 - A_1}{(1 + ((t_0/t)^h)^s)}$             | $A_1 = 0.00500$<br>$t_0 = 9.09315$<br>$s = 0.10158$       | $A_2 = 0.39989$<br>$h = 12.89192$                          | 0.0 h to 12.0 h  | 0.99234        |
| $Cys_{rel.}(t) = a + b_1 \cdot t + b_2 \cdot t^2 + b_3 \cdot t^3$ | $a = 0.99488$<br>$b_2 = -0.01235$                         | $b_1 = -0.16893$<br>$b_3 = 0.00231$                        | 0.0 h to 6.67 h  | 0.92454        |
| $Ile_{rel.}(t) = A_1 + \frac{A_2 - A_1}{(1 + e^{(t-t_0)/dt})}$    | $A_1 = 0.99257$<br>$t_0 = 5.13433$<br>$span = 0.83222$    | $A_2 = 0.14788$<br>$dt = 1.53344$<br>$EC_{50} = 169.75062$ | 0.0 h to 12.0 h  | 0.98845        |
| $Leu_{rel.}(t) = a + b \cdot t$                                   | $a = 0.96612$                                             | $b = -0.02369$                                             | 0.0 h to 5.25 h  | 0.48804        |
| $Leu_{rel.}(t) = A_1 \cdot e^{-t/x_1} + y_0$                      | $y_0 = 0.27023$<br>$x_1 = 1.20063$<br>$\tau = 0.83222$    | $A_1 = 35.72743$<br>$k = 0.83289$                          | 5.25 h to 12.0 h | 0.87374        |
| $Met_{rel.}(t) = a + b_1 \cdot t + b_2 \cdot t^2 + b_3 \cdot t^3$ | $a = 1.01491$<br>$b_2 = -0.07927$                         | $b_1 = -0.07017$<br>$b_3 = 0.01041$                        | 0.0 h to 4.67 h  | 0.87616        |
| $Pro_{rel.}(t) = A_1 \cdot e^{-t/x_1} + y_0$                      | $y_0 = 1.31687$<br>$x_1 = -11.33440$<br>$\tau = -7.85641$ | $A_1 = -0.32291$<br>$k = -0.08823$                         | 0.0 h to 5.25 h  | 0.99559        |
| $Pro_{rel.}(t) = A_1 \cdot e^{-t/x_1} + y_0$                      | $y_0 = 0.02347$<br>$x_1 = 1.07132$<br>$\tau = 0.74259$    | $A_1 = 57.12713$<br>$k = 0.93342$                          | 5.25 h to 12.0 h | 0.95409        |
| $Trp_{rel.}(t) = A_1 \cdot e^{-t/x_1} + y_0$                      | $y_0 = 1.34255$<br>$x_1 = -6.93747$<br>$\tau = -4.70769$  | $A_1 = -0.37572$<br>$k = -0.14414$                         | 0.0 h to 8.5 h   | 0.98919        |
| $Val_{rel.}(t) = a + b \cdot t$                                   | $a = 0.98328$                                             | $b = -0.02910$                                             | 0.0 h to 5.25 h  | 0.84721        |
| $Val_{rel.}(t) = A_1 \cdot e^{-t/x_1} + y_0$                      | $y_0 = 0.32975$<br>$x_1 = 0.88397$<br>$\tau = 0.61272$    | $A_1 = 196.70196$<br>$k = 1.13126$                         | 5.25 h to 12.0 h | 0.97966        |

Table S3 – continued from previous page

| Function                                                     | Parameters                                                                                   | Range            | R <sup>2</sup> |
|--------------------------------------------------------------|----------------------------------------------------------------------------------------------|------------------|----------------|
| $Gluc_{rel.}(t) = a + b_1 \cdot t + b_2 \cdot t^2$           | $a = 0.98356$<br>$b_1 = -0.06647$<br>$b_2 = -0.01745$                                        | 0.0 h to 5.25 h  | 0.99923        |
| $Gluc_{rel.}(t) = A_1 + \frac{A_2 - A_1}{(1 + (t_0/t)^h)^s}$ | $A_1 = 0.05196$<br>$t_0 = 15.87124$<br>$s = 1225.95789$<br>$A_2 = 2.17470$<br>$h = -9.82418$ | 5.25 h to 12.0 h | 0.99007        |



Table S4: Fits of the substrate concentrations and OD over time of CDMM-cultures with *C. difficile* 630 $\Delta$ *erm*.

| Function                                                          | Parameters                                               | Range                                                     | R <sup>2</sup>             |
|-------------------------------------------------------------------|----------------------------------------------------------|-----------------------------------------------------------|----------------------------|
| $OD(t) = A_1 \cdot e^{-t/x_1} + y_0$                              | $y_0 = -0.04045$<br>$x_1 = -1.04652$<br>$\tau = 0.72539$ | $A_1 = 0.04110$<br>$k = 0.955552$                         | 0.0 h to 2.0 h<br>0.95351  |
| $OD(t) = A_1 \cdot e^{-t/x_1} + y_0$                              | $y_0 = 0.00000$<br>$x_1 = -1.32201$<br>$\tau = 0.91635$  | $A_1 = 0.04757$<br>$k = 0.75642$                          | 1.0 h to 3.4 h<br>0.89764  |
| $OD(t) = a + b \cdot t$                                           | $a = -0.02090$                                           | $b = 0.19075$                                             | 3.5 h to 8.0 h<br>0.86917  |
| $Cys_{rel.}(t) = A_1 + \frac{A_2 - A_1}{(1 + e^{(t-t_0)/dt})}$    | $A_1 = 0.96740$<br>$t_0 = 2.03742$<br>$span = 0.86195$   | $A_2 = 0.10545$<br>$dt = 0.34962$<br>$EC_{50} = 7.67078$  | 0.0 h to 3.5 h<br>0.99883  |
| $Cys_{rel.}(t) = a + b \cdot t$                                   | $a = 0.75591$                                            | $b = -0.18272$                                            | 3.5 h to 4.0 h<br>0.99303  |
| $Ile_{rel.}(t) = A_1 \cdot e^{-t/x_1} + y_0$                      | $y_0 = 1.12163$<br>$x_1 = -1.58509$<br>$\tau = -1.09870$ | $A_1 = -0.10272$<br>$k = -0.63088$                        | 0.0 h to 3.5 h<br>0.92790  |
| $Ile_{rel.}(t) = a + b \cdot t$                                   | $a = 0.58216$                                            | $b = -0.12008$                                            | 3.5 h to 4.5 h<br>0.76521  |
| $Leu_{rel.}(t) = a + b_1 \cdot t + b_2 \cdot t^2 + b_3 \cdot t^3$ | $a = 0.99344$<br>$b_2 = 0.03270$                         | $b_1 = -0.10645$<br>$b_3 = -0.02375$                      | 0.0 h to 3.5 h<br>0.96144  |
| $Leu_{rel.}(t) = a + b \cdot t$                                   | $a = 0.31681$                                            | $b = -0.08192$                                            | 3.5 h to 3.75 h<br>-       |
| $Met_{rel.}(t) = A_1 \cdot e^{-t/x_1} + y_0$                      | $y_0 = 0.94952$<br>$x_1 = -1.17058$<br>$\tau = -0.81139$ | $A_1 = -0.03582$<br>$k = -0.85428$                        | 0.0 h to 3.75 h<br>0.99105 |
| $Pro_{rel.}(t) = A_1 + \frac{A_2 - A_1}{(1 + e^{(t-t_0)/dt})}$    | $A_1 = 1.31883$<br>$t_0 = 1.75619$<br>$span = 1.59886$   | $A_2 = -0.28003$<br>$dt = 1.19337$<br>$EC_{50} = 5.79033$ | 0.0 h to 3.5 h<br>0.99472  |
| $Trp_{rel.}(t) = A_1 \cdot e^{-t/x_1} + y_0$                      | $y_0 = 1.71645$<br>$x_1 = -9.26705$<br>$\tau = -6.42343$ | $A_1 = -0.72456$<br>$k = -0.10791$                        | 0.0 h to 5.25 h<br>0.99083 |

Table S4 – continued from previous page

| Function                                                       | Parameters                                               |                                                            | Range           | R <sup>2</sup> |
|----------------------------------------------------------------|----------------------------------------------------------|------------------------------------------------------------|-----------------|----------------|
| $Val_{rel.}(t) = A_1 \cdot e^{-t/x_1} + y_0$                   | $y_0 = 1.02750$<br>$x_1 = -2.33158$<br>$\tau = -1.61613$ | $A_1 = -0.09812$<br>$k = -0.42889$                         | 0.0 h to 5.25 h | 0.99051        |
| $Ala_{rel.}(t) = A_1 + \frac{A_2 - A_1}{(1 + e^{(t-t_0)/dt})}$ | $A_1 = 0.96241$<br>$t_0 = 2.44879$<br>$span = 0.63071$   | $A_2 = 0.33169$<br>$dt = 0.41349$<br>$EC_{50} = 11.17042$  | 0.0 h to 3.5 h  | 0.96921        |
| $Ala_{rel.}(t) = a + b_1 \cdot t + b_2 \cdot t^2$              | $a = -1.07653$<br>$b_2 = -0.10834$                       | $b_1 = 0.80434$                                            | 3.5 h to 5.25 h | 0.93296        |
| $Arg_{rel.}(t) = A_1 + \frac{A_2 - A_1}{(1 + e^{(t-t_0)/dt})}$ | $A_1 = 1.05930$<br>$t_0 = 2.41832$<br>$span = 0.69836$   | $A_2 = 0.36094$<br>$dt = 0.74592$<br>$EC_{50} = 11.22696$  | 0.0 h to 11.0 h | 0.99115        |
| $Asp_{rel.}(t) = A_1 + \frac{A_2 - A_1}{(1 + e^{(t-t_0)/dt})}$ | $A_1 = 0.99783$<br>$t_0 = 2.06163$<br>$span = 0.60847$   | $A_2 = 0.38936$<br>$dt = 0.25586$<br>$EC_{50} = 7.85877$   | 0.0 h to 3.5 h  | 0.99395        |
| $Asp_{rel.}(t) = A_1 \cdot e^{-t/x_1} + y_0$                   | $y_0 = 0.17968$<br>$x_1 = 0.43935$<br>$\tau = 0.30453$   | $A_1 = 619.04429$<br>$k = 2.27611$                         | 3.5 h to 5.25 h | 0.97811        |
| $Gly_{rel.}(t) = A_1 \cdot e^{-t/x_1} + y_0$                   | $y_0 = 1.34096$<br>$x_1 = -2.87096$<br>$\tau = -1.99000$ | $A_1 = -0.32757$<br>$k = -0.34832$                         | 3.5 h to 4.0 h  | 0.99942        |
| $Phe_{rel.}(t) = A_1 \cdot e^{-t/x_1} + y_0$                   | $y_0 = 1.11495$<br>$x_1 = -1.62541$<br>$\tau = -1.12651$ | $A_1 = -0.09174$<br>$k = -0.61530$                         | 0.0 h to 4.0 h  | 0.99718        |
| $Ser_{rel.}(t) = A_1 + \frac{A_2 - A_1}{(1 + e^{(t-t_0)/dt})}$ | $A_1 = 0.95887$<br>$t_0 = 2.83070$<br>$span = 0.99020$   | $A_2 = -0.03133$<br>$dt = 0.23137$<br>$EC_{50} = 16.95729$ | 0.0 h to 3.5 h  | 0.99801        |
| $Ser_{rel.}(t) = a + b \cdot t$                                | $a = 0.13832$                                            | $b = -0.03361$                                             | 3.5 h to 3.75 h | -              |
| $Thr_{rel.}(t) = A_1 \cdot e^{-t/x_1} + y_0$                   | $y_0 = 2.57581$<br>$x_1 = -9.94436$                      | $A_1 = -1.49028$<br>$k = -0.10056$                         | 0.0 h to 5.25 h | 0.96896        |

Table S4 – continued from previous page

| Function                                                        | Parameters                                               | Range                                                     | R <sup>2</sup>             |
|-----------------------------------------------------------------|----------------------------------------------------------|-----------------------------------------------------------|----------------------------|
|                                                                 | $\tau = -6.89291$                                        |                                                           |                            |
| $Tyr_{rel.}(t) = A_1 \cdot e^{-t/x_1} + y_0$                    | $y_0 = 1.39161$<br>$x_1 = -4.42492$<br>$\tau = -3.06712$ | $A_1 = -0.39354$<br>$k = -0.22599$                        | 0.0 h to 4.5 h<br>0.96196  |
| $His_{rel.}(t) = A_1 + \frac{A_2 - A_1}{(1 + e^{(t-t_0)/dt})}$  | $A_1 = 1.00560$<br>$t_0 = 2.90486$<br>$span = 0.76985$   | $A_2 = 0.23575$<br>$dt = 0.75226$<br>$EC_{50} = 18.26266$ | 0.0 h to 11.0 h<br>0.99096 |
| $Gluc_{rel.}(t) = a + b \cdot t$                                | $a = 0.99484$                                            | $b = -0.02424$                                            | 0.0 h to 3.0 h<br>0.69519  |
| $Gluc_{rel.}(t) = A_1 + \frac{A_2 - A_1}{(1 + e^{(t-t_0)/dt})}$ | $A_1 = 0.95438$<br>$t_0 = 4.06080$<br>$span = 0.86008$   | $A_2 = 0.09430$<br>$dt = 0.35287$<br>$EC_{50} = 58.02097$ | 1.5 h to 5.5 h<br>0.99589  |
